# Supplementary material
Source: publisher figshare collection journal article supplement (https://tandf.figshare.com/articles/dataset/_/26029465)
Supplement: Supplementary file 1 [file 1]

## Sheet: Table S1
Table S1. RNA-seq data.
gene ID	baseMean	log2FoldChange	lfcSE	stat	pvalue	padj	GO.BP	GO.CC	GO.MF
ENSG00000198842|DUSP27	1167.56	7.67495	0.454143	16.8998	4.51116e-64	7.42673e-60	GO:0006470: protein dephosphorylation;GO:0043409: negative regulation of MAPK cascade	GO:0005737: cytoplasm;GO:0030017: sarcomere	GO:0008138: protein tyrosine/serine/threonine phosphatase activity;GO:0008138: protein tyrosine/serine/threonine phosphatase activity;GO:0033549: MAP kinase phosphatase activity
ENSG00000125538|IL1B	8415.92	-3.96457	0.280336	-14.1422	2.08656e-45	1.71755e-41	GO:0000165: MAPK cascade;GO:0001660: fever generation;GO:0001934: positive regulation of protein phosphorylation;GO:0001934: positive regulation of protein phosphorylation;GO:0002711: positive regulation of T cell mediated immunity;GO:0006915: apoptotic process;GO:0006954: inflammatory response;GO:0006954: inflammatory response;GO:0006954: inflammatory response;GO:0006954: inflammatory response;G…	GO:0005576: extracellular region;GO:0005576: extracellular region;GO:0005576: extracellular region;GO:0005615: extracellular space;GO:0005615: extracellular space;GO:0005615: extracellular space;GO:0005764: lysosome;GO:0005829: cytosol	GO:0005125: cytokine activity;GO:0005125: cytokine activity;GO:0005125: cytokine activity;GO:0005125: cytokine activity;GO:0005149: interleukin-1 receptor binding;GO:0005178: integrin binding;GO:0005515: protein binding;GO:0019904: protein domain specific binding
ENSG00000171570|RAB4B-EGLN2	285.47	-5.38469	0.455951	-11.8098	3.47377e-32	1.90629e-28
ENSG00000183160|TMEM119	738.937	3.71647	0.318504	11.6685	1.84615e-31	7.59827e-28	GO:0001649: osteoblast differentiation;GO:0001934: positive regulation of protein phosphorylation;GO:0001958: endochondral ossification;GO:0007283: spermatogenesis;GO:0010628: positive regulation of gene expression;GO:0010832: negative regulation of myotube differentiation;GO:0030501: positive regulation of bone mineralization;GO:0030501: positive regulation of bone mineralization;GO:0031214: bio…	GO:0005789: endoplasmic reticulum membrane;GO:0005886: plasma membrane;GO:0005886: plasma membrane;GO:0016021: integral component of membrane	GO:0003674: molecular_function
ENSG00000060566|CREB3L3	320.211	4.19251	0.38529	10.8815	1.41274e-27	4.6516e-24	GO:0002675: positive regulation of acute inflammatory response;GO:0006357: regulation of transcription by RNA polymerase II;GO:0030968: endoplasmic reticulum unfolded protein response;GO:0045944: positive regulation of transcription by RNA polymerase II;GO:1990440: positive regulation of transcription from RNA polymerase II promoter in response to endoplasmic reticulum stress	GO:0000139: Golgi membrane;GO:0000785: chromatin;GO:0005634: nucleus;GO:0005634: nucleus;GO:0005654: nucleoplasm;GO:0005783: endoplasmic reticulum;GO:0005789: endoplasmic reticulum membrane;GO:0005829: cytosol;GO:0016020: membrane;GO:0016021: integral component of membrane	GO:0000976: transcription cis-regulatory region binding;GO:0000977: RNA polymerase II transcription regulatory region sequence-specific DNA binding;GO:0000978: RNA polymerase II cis-regulatory region sequence-specific DNA binding;GO:0000981: DNA-binding transcription factor activity, RNA polymerase II-specific;GO:0000981: DNA-binding transcription factor activity, RNA polymerase II-specific;GO:00…
ENSG00000064195|DLX3	1033.08	3.43961	0.317958	10.8178	2.83376e-27	7.77537e-24	GO:0001568: blood vessel development;GO:0001890: placenta development;GO:0006357: regulation of transcription by RNA polymerase II;GO:0009790: embryo development;GO:0030154: cell differentiation;GO:0030855: epithelial cell differentiation;GO:0042475: odontogenesis of dentin-containing tooth;GO:0045944: positive regulation of transcription by RNA polymerase II;GO:0071895: odontoblast differentiati…	GO:0000785: chromatin;GO:0005634: nucleus	GO:0000978: RNA polymerase II cis-regulatory region sequence-specific DNA binding;GO:0000981: DNA-binding transcription factor activity, RNA polymerase II-specific;GO:0000981: DNA-binding transcription factor activity, RNA polymerase II-specific;GO:0001228: DNA-binding transcription activator activity, RNA polymerase II-specific;GO:0003677: DNA binding;GO:0003682: chromatin binding;GO:0003700: DN…
ENSG00000089250|NOS1	3507.52	6.35335	0.593292	10.7086	9.27223e-27	2.1807e-23	GO:0001666: response to hypoxia;GO:0002028: regulation of sodium ion transport;GO:0006527: arginine catabolic process;GO:0006527: arginine catabolic process;GO:0006809: nitric oxide biosynthetic process;GO:0006809: nitric oxide biosynthetic process;GO:0006936: muscle contraction;GO:0006941: striated muscle contraction;GO:0007263: nitric oxide mediated signal transduction;GO:0007520: myoblast fusi…	GO:0001917: photoreceptor inner segment;GO:0005634: nucleus;GO:0005654: nucleoplasm;GO:0005737: cytoplasm;GO:0005737: cytoplasm;GO:0005739: mitochondrion;GO:0005829: cytosol;GO:0005829: cytosol;GO:0005856: cytoskeleton;GO:0005886: plasma membrane;GO:0005886: plasma membrane;GO:0012506: vesicle membrane;GO:0014069: postsynaptic density;GO:0016529: sarcoplasmic reticulum;GO:0032991: protein-contain…	GO:0004517: nitric-oxide synthase activity;GO:0004517: nitric-oxide synthase activity;GO:0004517: nitric-oxide synthase activity;GO:0004517: nitric-oxide synthase activity;GO:0005515: protein binding;GO:0005516: calmodulin binding;GO:0010181: FMN binding;GO:0010181: FMN binding;GO:0016491: oxidoreductase activity;GO:0017080: sodium channel regulator activity;GO:0020037: heme binding;GO:0034617: t…
ENSG00000269113|TRABD2B	179.37	6.20158	0.599947	10.3369	4.7991e-25	9.87595e-22	GO:0006508: proteolysis;GO:0016055: Wnt signaling pathway;GO:0030178: negative regulation of Wnt signaling pathway;GO:0030178: negative regulation of Wnt signaling pathway;GO:0031334: positive regulation of protein-containing complex assembly;GO:1904808: positive regulation of protein oxidation	GO:0005887: integral component of plasma membrane;GO:0005887: integral component of plasma membrane;GO:0016020: membrane;GO:0031301: integral component of organelle membrane;GO:0031301: integral component of organelle membrane	GO:0004222: metalloendopeptidase activity;GO:0004222: metalloendopeptidase activity;GO:0005515: protein binding;GO:0017147: Wnt-protein binding;GO:0017147: Wnt-protein binding;GO:0017147: Wnt-protein binding;GO:0046872: metal ion binding
ENSG00000196502|SULT1A1	353.539	4.69789	0.457196	10.2754	9.09423e-25	1.66354e-21	GO:0006068: ethanol catabolic process;GO:0006584: catecholamine metabolic process;GO:0006805: xenobiotic metabolic process;GO:0008210: estrogen metabolic process;GO:0009308: amine metabolic process;GO:0009812: flavonoid metabolic process;GO:0050427: 3'-phosphoadenosine 5'-phosphosulfate metabolic process;GO:0051923: sulfation;GO:0051923: sulfation;GO:0051923: sulfation	GO:0005737: cytoplasm;GO:0005829: cytosol;GO:0005829: cytosol	GO:0004062: aryl sulfotransferase activity;GO:0004062: aryl sulfotransferase activity;GO:0005515: protein binding;GO:0008146: sulfotransferase activity;GO:0008146: sulfotransferase activity;GO:0047894: flavonol 3-sulfotransferase activity;GO:0050294: steroid sulfotransferase activity;GO:0050656: 3'-phosphoadenosine 5'-phosphosulfate binding
ENSG00000102935|ZNF423	178.558	6.48704	0.638168	10.1651	2.83836e-24	4.67279e-21	GO:0006355: regulation of transcription, DNA-templated;GO:0006357: regulation of transcription by RNA polymerase II;GO:0007219: Notch signaling pathway;GO:0021930: cerebellar granule cell precursor proliferation;GO:0021938: smoothened signaling pathway involved in regulation of cerebellar granule cell precursor cell proliferation;GO:0030154: cell differentiation;GO:0030513: positive regulation of…	GO:0005634: nucleus;GO:0005654: nucleoplasm	GO:0000978: RNA polymerase II cis-regulatory region sequence-specific DNA binding;GO:0000981: DNA-binding transcription factor activity, RNA polymerase II-specific;GO:0005515: protein binding;GO:0043565: sequence-specific DNA binding;GO:0046872: metal ion binding
ENSG00000254996|ANKHD1-EIF4EBP3	1211.26	-3.05047	0.301769	-10.1086	5.0582e-24	7.57028e-21
ENSG00000274012|RN7SL2	7465	3.99532	0.401537	9.95007	2.52002e-23	3.45725e-20	GO:0006617: SRP-dependent cotranslational protein targeting to membrane, signal sequence recognition	GO:0005786: signal recognition particle, endoplasmic reticulum targeting
ENSG00000278771|RN7SL3	1405.79	3.80108	0.382425	9.93941	2.80478e-23	3.55193e-20	GO:0006617: SRP-dependent cotranslational protein targeting to membrane, signal sequence recognition	GO:0005786: signal recognition particle, endoplasmic reticulum targeting
ENSG00000243649|CFB	472.406	4.05269	0.428426	9.45949	3.09441e-21	3.6388e-18	GO:0006508: proteolysis;GO:0006957: complement activation, alternative pathway;GO:0006957: complement activation, alternative pathway	GO:0005576: extracellular region;GO:0005615: extracellular space;GO:0005886: plasma membrane;GO:0070062: extracellular exosome;GO:0072562: blood microparticle	GO:0001848: complement binding;GO:0004252: serine-type endopeptidase activity;GO:0005515: protein binding
ENSG00000163815|CLEC3B	642.81	3.63773	0.402083	9.0472	1.4668e-19	1.60986e-16	GO:0001503: ossification;GO:0001503: ossification;GO:0010756: positive regulation of plasminogen activation;GO:0030282: bone mineralization;GO:0030282: bone mineralization;GO:0030282: bone mineralization;GO:0071310: cellular response to organic substance;GO:0071560: cellular response to transforming growth factor beta stimulus	GO:0001652: granular component;GO:0005576: extracellular region;GO:0005576: extracellular region;GO:0005576: extracellular region;GO:0005615: extracellular space;GO:0005615: extracellular space;GO:0005615: extracellular space;GO:0005737: cytoplasm;GO:0031089: platelet dense granule lumen;GO:0062023: collagen-containing extracellular matrix;GO:0062023: collagen-containing extracellular matrix;GO:0…	GO:0005509: calcium ion binding;GO:0008201: heparin binding;GO:0030246: carbohydrate binding;GO:0036143: kringle domain binding
ENSG00000231764|DLX6-AS1	224.84	5.80873	0.649812	8.9391	3.92367e-19	4.03722e-16
ENSG00000187498|COL4A1	262.51	5.74229	0.642869	8.93228	4.17314e-19	4.04132e-16	GO:0001569: branching involved in blood vessel morphogenesis;GO:0007420: brain development;GO:0007528: neuromuscular junction development;GO:0030198: extracellular matrix organization;GO:0030855: epithelial cell differentiation;GO:0038063: collagen-activated tyrosine kinase receptor signaling pathway;GO:0048514: blood vessel morphogenesis;GO:0061304: retinal blood vessel morphogenesis;GO:0061333:…	GO:0005576: extracellular region;GO:0005576: extracellular region;GO:0005587: collagen type IV trimer;GO:0005604: basement membrane;GO:0005604: basement membrane;GO:0005615: extracellular space;GO:0005788: endoplasmic reticulum lumen;GO:0031012: extracellular matrix;GO:0062023: collagen-containing extracellular matrix;GO:0062023: collagen-containing extracellular matrix	GO:0005201: extracellular matrix structural constituent;GO:0005201: extracellular matrix structural constituent;GO:0005515: protein binding;GO:0030020: extracellular matrix structural constituent conferring tensile strength;GO:0030020: extracellular matrix structural constituent conferring tensile strength;GO:0030020: extracellular matrix structural constituent conferring tensile strength;GO:0048…
ENSG00000168528|SERINC2	203.149	3.93632	0.450734	8.73313	2.47728e-18	2.26575e-15	GO:0006658: phosphatidylserine metabolic process;GO:0006665: sphingolipid metabolic process;GO:1904219: positive regulation of CDP-diacylglycerol-serine O-phosphatidyltransferase activity;GO:1904222: positive regulation of serine C-palmitoyltransferase activity	GO:0016020: membrane;GO:0016021: integral component of membrane;GO:0070062: extracellular exosome
ENSG00000240505|TNFRSF13B	104.283	5.04855	0.578509	8.72682	2.61923e-18	2.2695e-15	GO:0001782: B cell homeostasis;GO:0002244: hematopoietic progenitor cell differentiation;GO:0002250: adaptive immune response;GO:0007166: cell surface receptor signaling pathway;GO:0030889: negative regulation of B cell proliferation	GO:0005886: plasma membrane;GO:0005887: integral component of plasma membrane	GO:0005515: protein binding;GO:0038023: signaling receptor activity
ENSG00000276168|RN7SL1	6771.48	3.76306	0.432029	8.71021	3.03313e-18	2.49672e-15	GO:0006617: SRP-dependent cotranslational protein targeting to membrane, signal sequence recognition	GO:0005786: signal recognition particle, endoplasmic reticulum targeting
ENSG00000167941|SOST	304.693	3.34264	0.388208	8.61045	7.27735e-18	5.7051e-15	GO:0001503: ossification;GO:0009612: response to mechanical stimulus;GO:0016055: Wnt signaling pathway;GO:0030178: negative regulation of Wnt signaling pathway;GO:0030279: negative regulation of ossification;GO:0030514: negative regulation of BMP signaling pathway;GO:0030514: negative regulation of BMP signaling pathway;GO:0031333: negative regulation of protein-containing complex assembly;GO:004…	GO:0005576: extracellular region;GO:0005615: extracellular space;GO:0005794: Golgi apparatus;GO:0032991: protein-containing complex;GO:0062023: collagen-containing extracellular matrix	GO:0005515: protein binding;GO:0008134: transcription factor binding;GO:0008201: heparin binding;GO:0036122: BMP binding
ENSG00000206077|ZDHHC11B	157.065	3.80464	0.443903	8.57088	1.027e-17	7.68521e-15	GO:0006612: protein targeting to membrane;GO:0018230: peptidyl-L-cysteine S-palmitoylation	GO:0005783: endoplasmic reticulum;GO:0005794: Golgi apparatus;GO:0016021: integral component of membrane	GO:0019706: protein-cysteine S-palmitoyltransferase activity
ENSG00000268388|FENDRR	110.764	6.15914	0.722668	8.52278	1.55768e-17	1.11496e-14
ENSG00000283293|RN7SK	2799.76	4.55766	0.540703	8.42914	3.48209e-17	2.38857e-14	GO:0034244: negative regulation of transcription elongation from RNA polymerase II promoter	GO:0120259: 7SK snRNP
ENSG00000136235|GPNMB	1495.65	2.53006	0.306178	8.26337	1.41622e-16	9.32611e-14	GO:0001649: osteoblast differentiation;GO:0001818: negative regulation of cytokine production;GO:0001934: positive regulation of protein phosphorylation;GO:0007155: cell adhesion;GO:0007165: signal transduction;GO:0007267: cell-cell signaling;GO:0008285: negative regulation of cell population proliferation;GO:0030282: bone mineralization;GO:0030335: positive regulation of cell migration;GO:003195…	GO:0005886: plasma membrane;GO:0005887: integral component of plasma membrane;GO:0016021: integral component of membrane;GO:0031901: early endosome membrane;GO:0033162: melanosome membrane	GO:0005178: integrin binding;GO:0005515: protein binding;GO:0008201: heparin binding;GO:0042056: chemoattractant activity;GO:0045545: syndecan binding;GO:0048018: receptor ligand activity
ENSG00000277209|RPPH1	140.078	3.98901	0.483306	8.2536	1.53696e-16	9.67287e-14
ENSG00000287542|AC098582.1	701.95	4.00544	0.485519	8.24982	1.58639e-16	9.67287e-14	GO:0016567: protein ubiquitination	GO:0005829: cytosol;GO:0031410: cytoplasmic vesicle	GO:0004842: ubiquitin-protein transferase activity
ENSG00000064205|CCN5	247.414	3.92453	0.495425	7.92154	2.34579e-15	1.37924e-12	GO:0007155: cell adhesion;GO:0007165: signal transduction;GO:0007267: cell-cell signaling;GO:0060548: negative regulation of cell death	GO:0005615: extracellular space;GO:0005634: nucleus;GO:0031012: extracellular matrix	GO:0005178: integrin binding;GO:0005515: protein binding;GO:0005520: insulin-like growth factor binding;GO:0008201: heparin binding
ENSG00000099994|SUSD2	113.579	4.79812	0.611758	7.84316	4.39341e-15	2.49409e-12	GO:0051782: negative regulation of cell division;GO:1902807: negative regulation of cell cycle G1/S phase transition	GO:0005615: extracellular space;GO:0005886: plasma membrane;GO:0016021: integral component of membrane;GO:0070062: extracellular exosome	GO:0005515: protein binding
ENSG00000159713|TPPP3	807.442	2.32665	0.303882	7.65644	1.91153e-14	1.04898e-11	GO:0001578: microtubule bundle formation;GO:0001578: microtubule bundle formation;GO:0007566: embryo implantation;GO:0032273: positive regulation of protein polymerization;GO:0046697: decidualization;GO:0046785: microtubule polymerization;GO:0046785: microtubule polymerization	GO:0005874: microtubule;GO:0048471: perinuclear region of cytoplasm;GO:0097427: microtubule bundle	GO:0015631: tubulin binding;GO:0015631: tubulin binding
ENSG00000175084|DES	161.18	3.4974	0.462673	7.55911	4.05825e-14	2.15519e-11	GO:0006936: muscle contraction;GO:0007010: cytoskeleton organization;GO:0008016: regulation of heart contraction;GO:0045109: intermediate filament organization	GO:0005634: nucleus;GO:0005829: cytosol;GO:0005882: intermediate filament;GO:0005916: fascia adherens;GO:0014704: intercalated disc;GO:0030018: Z disc;GO:0031594: neuromuscular junction;GO:0042383: sarcolemma;GO:0045111: intermediate filament cytoskeleton;GO:0070062: extracellular exosome;GO:0097512: cardiac myofibril	GO:0005200: structural constituent of cytoskeleton;GO:0005515: protein binding;GO:0008092: cytoskeletal protein binding;GO:0042802: identical protein binding
ENSG00000265735|RN7SL5P	579.969	2.55114	0.340699	7.48796	6.99531e-14	3.59887e-11
ENSG00000285837|AC024598.1	204.037	-3.64075	0.491414	-7.40873	1.27515e-13	6.36147e-11
ENSG00000151025|GPR158	100.613	-4.39861	0.604396	-7.27769	3.39579e-13	1.64426e-10	GO:0007186: G protein-coupled receptor signaling pathway;GO:0072659: protein localization to plasma membrane	GO:0005886: plasma membrane;GO:0016021: integral component of membrane	GO:0004930: G protein-coupled receptor activity
ENSG00000162551|ALPL	201.14	3.0054	0.417638	7.19619	6.19205e-13	2.91256e-10	GO:0001501: skeletal system development;GO:0001649: osteoblast differentiation;GO:0001958: endochondral ossification;GO:0003006: developmental process involved in reproduction;GO:0016311: dephosphorylation;GO:0032496: response to lipopolysaccharide;GO:0033280: response to vitamin D;GO:0046677: response to antibiotic;GO:0051384: response to glucocorticoid;GO:0071407: cellular response to organic c…	GO:0005576: extracellular region;GO:0005758: mitochondrial intermembrane space;GO:0005886: plasma membrane;GO:0005886: plasma membrane;GO:0016020: membrane;GO:0031012: extracellular matrix;GO:0031225: anchored component of membrane;GO:0031966: mitochondrial membrane;GO:0070062: extracellular exosome	GO:0004035: alkaline phosphatase activity;GO:0005515: protein binding;GO:0016462: pyrophosphatase activity;GO:0046872: metal ion binding;GO:0050187: phosphoamidase activity
ENSG00000187244|BCAM	296.706	2.63655	0.366929	7.18546	6.69803e-13	3.06305e-10	GO:0007155: cell adhesion;GO:0007160: cell-matrix adhesion;GO:0007165: signal transduction	GO:0005576: extracellular region;GO:0005886: plasma membrane;GO:0005886: plasma membrane;GO:0005887: integral component of plasma membrane;GO:0009897: external side of plasma membrane;GO:0062023: collagen-containing extracellular matrix;GO:0070062: extracellular exosome	GO:0004888: transmembrane signaling receptor activity;GO:0005055: laminin receptor activity;GO:0005055: laminin receptor activity;GO:0005515: protein binding;GO:0008022: protein C-terminus binding;GO:0043236: laminin binding
ENSG00000105880|DLX5	242.736	2.8187	0.393281	7.16713	7.6587e-13	3.40771e-10	GO:0001501: skeletal system development;GO:0001649: osteoblast differentiation;GO:0001958: endochondral ossification;GO:0006357: regulation of transcription by RNA polymerase II;GO:0007399: nervous system development;GO:0008283: cell population proliferation;GO:0009790: embryo development;GO:0010628: positive regulation of gene expression;GO:0021889: olfactory bulb interneuron differentiation;GO:…	GO:0000785: chromatin;GO:0000785: chromatin;GO:0005634: nucleus;GO:0005737: cytoplasm	GO:0000976: transcription cis-regulatory region binding;GO:0000978: RNA polymerase II cis-regulatory region sequence-specific DNA binding;GO:0000978: RNA polymerase II cis-regulatory region sequence-specific DNA binding;GO:0000981: DNA-binding transcription factor activity, RNA polymerase II-specific;GO:0000981: DNA-binding transcription factor activity, RNA polymerase II-specific;GO:0001228: DNA…
ENSG00000115165|CYTIP	188.287	2.84919	0.398248	7.15431	8.40922e-13	3.64318e-10	GO:0030155: regulation of cell adhesion;GO:0030155: regulation of cell adhesion	GO:0005654: nucleoplasm;GO:0005737: cytoplasm;GO:0005769: early endosome;GO:0005829: cytosol;GO:0005938: cell cortex;GO:0005938: cell cortex	GO:0005515: protein binding
ENSG00000197632|SERPINB2	1544.26	-2.10274	0.29504	-7.12696	1.02608e-12	4.33139e-10	GO:0010951: negative regulation of endopeptidase activity;GO:0042060: wound healing;GO:0042730: fibrinolysis;GO:0043066: negative regulation of apoptotic process	GO:0005576: extracellular region;GO:0005615: extracellular space;GO:0005737: cytoplasm;GO:0005886: plasma membrane	GO:0004867: serine-type endopeptidase inhibitor activity;GO:0004867: serine-type endopeptidase inhibitor activity
ENSG00000165507|DEPP1	3366.51	2.34458	0.331348	7.07589	1.48489e-12	5.96239e-10	GO:0006914: autophagy;GO:0010506: regulation of autophagy;GO:0010506: regulation of autophagy	GO:0005737: cytoplasm;GO:0005739: mitochondrion;GO:0005739: mitochondrion;GO:0005777: peroxisome;GO:0043231: intracellular membrane-bounded organelle
ENSG00000281181|FP236383.5	283576	4.64014	0.655618	7.07751	1.46764e-12	5.96239e-10
ENSG00000105825|TFPI2	14902	-2.46568	0.349661	-7.05161	1.76855e-12	6.93228e-10	GO:0007596: blood coagulation;GO:0010951: negative regulation of endopeptidase activity;GO:0071498: cellular response to fluid shear stress	GO:0005615: extracellular space;GO:0031012: extracellular matrix	GO:0004867: serine-type endopeptidase inhibitor activity;GO:0005201: extracellular matrix structural constituent
ENSG00000148346|LCN2	96.2383	-3.69146	0.526151	-7.01598	2.28343e-12	8.74236e-10	GO:0006915: apoptotic process;GO:0006953: acute-phase response;GO:0009410: response to xenobiotic stimulus;GO:0009635: response to herbicide;GO:0009637: response to blue light;GO:0010040: response to iron(II) ion;GO:0010046: response to mycotoxin;GO:0010595: positive regulation of endothelial cell migration;GO:0010628: positive regulation of gene expression;GO:0015891: siderophore transport;GO:00…	GO:0005576: extracellular region;GO:0005576: extracellular region;GO:0005576: extracellular region;GO:0005615: extracellular space;GO:0005615: extracellular space;GO:0005615: extracellular space;GO:0005829: cytosol;GO:0035580: specific granule lumen;GO:0070062: extracellular exosome	GO:0002020: protease binding;GO:0005506: iron ion binding;GO:0005506: iron ion binding;GO:0005515: protein binding;GO:0036094: small molecule binding;GO:0042802: identical protein binding;GO:1903981: enterobactin binding
ENSG00000012171|SEMA3B	463.676	2.33473	0.333104	7.00901	2.40013e-12	8.9803e-10	GO:0001755: neural crest cell migration;GO:0007267: cell-cell signaling;GO:0007411: axon guidance;GO:0030335: positive regulation of cell migration;GO:0048843: negative regulation of axon extension involved in axon guidance;GO:0050919: negative chemotaxis;GO:0061643: chemorepulsion of axon;GO:0071526: semaphorin-plexin signaling pathway	GO:0005615: extracellular space;GO:0005783: endoplasmic reticulum;GO:0005887: integral component of plasma membrane;GO:0062023: collagen-containing extracellular matrix	GO:0030215: semaphorin receptor binding;GO:0045499: chemorepellent activity;GO:0045499: chemorepellent activity
ENSG00000189129|PLAC9	88.7855	3.54809	0.508943	6.97149	3.13602e-12	1.14729e-09		GO:0005576: extracellular region	GO:0005515: protein binding
ENSG00000117643|MAN1C1	355.807	2.55411	0.368945	6.92275	4.4296e-12	1.58532e-09	GO:0005975: carbohydrate metabolic process;GO:0006487: protein N-linked glycosylation;GO:0006491: N-glycan processing;GO:1904381: Golgi apparatus mannose trimming	GO:0000139: Golgi membrane;GO:0000139: Golgi membrane;GO:0005783: endoplasmic reticulum;GO:0030173: integral component of Golgi membrane;GO:0070062: extracellular exosome	GO:0004571: mannosyl-oligosaccharide 1,2-alpha-mannosidase activity;GO:0004571: mannosyl-oligosaccharide 1,2-alpha-mannosidase activity;GO:0005509: calcium ion binding;GO:0005515: protein binding
ENSG00000109846|CRYAB	256.327	2.47285	0.361696	6.83682	8.09705e-12	2.83621e-09	GO:0001666: response to hypoxia;GO:0002088: lens development in camera-type eye;GO:0006457: protein folding;GO:0006936: muscle contraction;GO:0007021: tubulin complex assembly;GO:0007517: muscle organ development;GO:0010259: multicellular organism aging;GO:0010629: negative regulation of gene expression;GO:0010941: regulation of cell death;GO:0030308: negative regulation of cell growth;GO:0031109…	GO:0005634: nucleus;GO:0005654: nucleoplasm;GO:0005737: cytoplasm;GO:0005739: mitochondrion;GO:0005794: Golgi apparatus;GO:0005829: cytosol;GO:0009986: cell surface;GO:0014069: postsynaptic density;GO:0015630: microtubule cytoskeleton;GO:0030018: Z disc;GO:0030424: axon;GO:0031430: M band;GO:0032432: actin filament bundle;GO:0032991: protein-containing complex;GO:0043197: dendritic spine;GO:00432…	GO:0001540: amyloid-beta binding;GO:0005198: structural molecule activity;GO:0005212: structural constituent of eye lens;GO:0005515: protein binding;GO:0008017: microtubule binding;GO:0042802: identical protein binding;GO:0042803: protein homodimerization activity;GO:0044877: protein-containing complex binding;GO:0046872: metal ion binding;GO:0051082: unfolded protein binding
ENSG00000106483|SFRP4	118.02	3.17037	0.464355	6.82746	8.64325e-12	2.96446e-09	GO:0002092: positive regulation of receptor internalization;GO:0008285: negative regulation of cell population proliferation;GO:0009725: response to hormone;GO:0010628: positive regulation of gene expression;GO:0030154: cell differentiation;GO:0030178: negative regulation of Wnt signaling pathway;GO:0030510: regulation of BMP signaling pathway;GO:0035567: non-canonical Wnt signaling pathway;GO:00…	GO:0005615: extracellular space;GO:0005615: extracellular space;GO:0005634: nucleus;GO:0005737: cytoplasm;GO:0005737: cytoplasm;GO:0009986: cell surface	GO:0005515: protein binding;GO:0017147: Wnt-protein binding;GO:0017147: Wnt-protein binding;GO:0017147: Wnt-protein binding;GO:0017147: Wnt-protein binding
ENSG00000130487|KLHDC7B	95.8548	-3.67379	0.542726	-6.76915	1.29544e-11	4.35242e-09			GO:0005515: protein binding
ENSG00000272601|AC010655.3	274.826	2.68872	0.397512	6.76386	1.34365e-11	4.42409e-09
ENSG00000175868|CALCB	195.857	2.62609	0.391138	6.71396	1.89407e-11	6.11413e-09	GO:0006874: cellular calcium ion homeostasis;GO:0007165: signal transduction;GO:0007189: adenylate cyclase-activating G protein-coupled receptor signaling pathway;GO:0051480: regulation of cytosolic calcium ion concentration	GO:0005576: extracellular region;GO:0005615: extracellular space	GO:0005184: neuropeptide hormone activity;GO:0005515: protein binding;GO:0031716: calcitonin receptor binding
ENSG00000138641|HERC3	973.877	-2.26905	0.339043	-6.6925	2.19394e-11	6.94594e-09	GO:0016567: protein ubiquitination	GO:0005829: cytosol;GO:0031410: cytoplasmic vesicle	GO:0004842: ubiquitin-protein transferase activity
ENSG00000161381|PLXDC1	202.268	2.51309	0.381143	6.59357	4.29375e-11	1.33374e-08	GO:0001525: angiogenesis;GO:0021510: spinal cord development	GO:0005576: extracellular region;GO:0005737: cytoplasm;GO:0005886: plasma membrane;GO:0005923: bicellular tight junction;GO:0016021: integral component of membrane;GO:0030425: dendrite;GO:0043025: neuronal cell body;GO:0043235: receptor complex	GO:0005515: protein binding
ENSG00000277739|5_8S_rRNA	85.005	3.74557	0.571252	6.55677	5.49844e-11	1.67631e-08
ENSG00000277075|H2AC8	88.5704	3.40439	0.520075	6.54596	5.91148e-11	1.76947e-08	GO:0008285: negative regulation of cell population proliferation;GO:0031507: heterochromatin assembly	GO:0000786: nucleosome;GO:0005634: nucleus;GO:0005634: nucleus;GO:0070062: extracellular exosome	GO:0003677: DNA binding;GO:0003677: DNA binding;GO:0005515: protein binding;GO:0046982: protein heterodimerization activity
ENSG00000136541|ERMN	240.314	2.5128	0.384237	6.53971	6.1639e-11	1.81208e-08	GO:0001763: morphogenesis of a branching structure;GO:0007015: actin filament organization;GO:0007015: actin filament organization;GO:0008360: regulation of cell shape;GO:0008360: regulation of cell shape;GO:0031344: regulation of cell projection organization;GO:0031344: regulation of cell projection organization	GO:0005737: cytoplasm;GO:0005856: cytoskeleton;GO:0005938: cell cortex;GO:0005938: cell cortex;GO:0030175: filopodium;GO:0033269: internode region of axon;GO:0033269: internode region of axon;GO:0033270: paranode region of axon;GO:0033270: paranode region of axon;GO:0043025: neuronal cell body;GO:0043209: myelin sheath;GO:0070062: extracellular exosome	GO:0005515: protein binding;GO:0051015: actin filament binding
ENSG00000105246|EBI3	70.2837	3.84133	0.59079	6.50203	7.92446e-11	2.24932e-08	GO:0006959: humoral immune response;GO:0019221: cytokine-mediated signaling pathway;GO:0032729: positive regulation of interferon-gamma production;GO:0033210: leptin-mediated signaling pathway;GO:0042088: T-helper 1 type immune response;GO:0046641: positive regulation of alpha-beta T cell proliferation	GO:0005576: extracellular region;GO:0005615: extracellular space;GO:0005788: endoplasmic reticulum lumen;GO:0005886: plasma membrane;GO:0009897: external side of plasma membrane;GO:0043235: receptor complex	GO:0004896: cytokine receptor activity;GO:0004896: cytokine receptor activity;GO:0005125: cytokine activity;GO:0005515: protein binding;GO:0017046: peptide hormone binding;GO:0019955: cytokine binding
ENSG00000095303|PTGS1	63.2595	4.29601	0.660691	6.5023	7.90991e-11	2.24932e-08	GO:0001516: prostaglandin biosynthetic process;GO:0006954: inflammatory response;GO:0006979: response to oxidative stress;GO:0008217: regulation of blood pressure;GO:0019371: cyclooxygenase pathway;GO:0019371: cyclooxygenase pathway;GO:0042127: regulation of cell population proliferation;GO:0098869: cellular oxidant detoxification	GO:0001750: photoreceptor outer segment;GO:0005737: cytoplasm;GO:0005737: cytoplasm;GO:0005737: cytoplasm;GO:0005789: endoplasmic reticulum membrane;GO:0005794: Golgi apparatus;GO:0043005: neuron projection;GO:0043231: intracellular membrane-bounded organelle;GO:0070062: extracellular exosome	GO:0004601: peroxidase activity;GO:0004666: prostaglandin-endoperoxide synthase activity;GO:0004666: prostaglandin-endoperoxide synthase activity;GO:0005515: protein binding;GO:0016702: oxidoreductase activity, acting on single donors with incorporation of molecular oxygen, incorporation of two atoms of oxygen;GO:0020037: heme binding;GO:0046872: metal ion binding;GO:0051213: dioxygenase activity
ENSG00000175745|NR2F1	5007.02	1.88492	0.290915	6.47928	9.21619e-11	2.57163e-08	GO:0000122: negative regulation of transcription by RNA polymerase II;GO:0000122: negative regulation of transcription by RNA polymerase II;GO:0006357: regulation of transcription by RNA polymerase II;GO:0007165: signal transduction;GO:0007399: nervous system development;GO:0010977: negative regulation of neuron projection development;GO:0030154: cell differentiation;GO:0030522: intracellular rec…	GO:0005634: nucleus;GO:0005654: nucleoplasm;GO:0005654: nucleoplasm;GO:0005829: cytosol	GO:0000978: RNA polymerase II cis-regulatory region sequence-specific DNA binding;GO:0000978: RNA polymerase II cis-regulatory region sequence-specific DNA binding;GO:0001227: DNA-binding transcription repressor activity, RNA polymerase II-specific;GO:0003700: DNA-binding transcription factor activity;GO:0004879: nuclear receptor activity;GO:0005515: protein binding;GO:0008270: zinc ion binding;G…
ENSG00000278233|RNA5-8SN2	91.6944	3.69989	0.575107	6.43338	1.24794e-10	3.42413e-08
ENSG00000275215|RNA5-8SN3	84.3225	3.62183	0.563411	6.42839	1.28962e-10	3.48049e-08
ENSG00000265185|SNORD3B-1	91.4086	3.24269	0.505665	6.41273	1.42935e-10	3.7954e-08
ENSG00000145934|TENM2	1591.08	-2.30407	0.364027	-6.3294	2.46116e-10	6.43143e-08	GO:0000122: negative regulation of transcription by RNA polymerase II;GO:0007157: heterophilic cell-cell adhesion via plasma membrane cell adhesion molecules;GO:0007165: signal transduction;GO:0048666: neuron development;GO:0051491: positive regulation of filopodium assembly;GO:0098609: cell-cell adhesion	GO:0005634: nucleus;GO:0005783: endoplasmic reticulum;GO:0005794: Golgi apparatus;GO:0005886: plasma membrane;GO:0005887: integral component of plasma membrane;GO:0016605: PML body;GO:0030054: cell junction;GO:0030175: filopodium;GO:0030425: dendrite;GO:0030426: growth cone;GO:0043005: neuron projection;GO:0043005: neuron projection;GO:0043197: dendritic spine;GO:0045202: synapse;GO:0045211: post…	GO:0005509: calcium ion binding;GO:0042803: protein homodimerization activity;GO:0042803: protein homodimerization activity;GO:0046982: protein heterodimerization activity;GO:0046982: protein heterodimerization activity;GO:0050839: cell adhesion molecule binding
ENSG00000188385|JAKMIP3	78.0459	3.79252	0.60089	6.31151	2.76334e-10	7.10825e-08		GO:0005794: Golgi apparatus	GO:0008017: microtubule binding;GO:0019900: kinase binding
ENSG00000259001|AL355075.4	144.734	4.40111	0.698416	6.30156	2.94673e-10	7.46338e-08
ENSG00000203812|H2AC18	350.067	2.18927	0.348477	6.2824	3.33396e-10	8.31622e-08	GO:0008150: biological_process;GO:0031507: heterochromatin assembly	GO:0000786: nucleosome;GO:0005634: nucleus;GO:0005634: nucleus;GO:0070062: extracellular exosome	GO:0003674: molecular_function;GO:0003677: DNA binding;GO:0005515: protein binding;GO:0046982: protein heterodimerization activity
ENSG00000168000|BSCL2	1728.69	1.91927	0.306024	6.27163	3.57277e-10	8.77888e-08	GO:0016042: lipid catabolic process;GO:0019915: lipid storage;GO:0019915: lipid storage;GO:0034389: lipid droplet organization;GO:0034389: lipid droplet organization;GO:0045444: fat cell differentiation;GO:0050995: negative regulation of lipid catabolic process;GO:0120162: positive regulation of cold-induced thermogenesis;GO:0140042: lipid droplet formation;GO:0140042: lipid droplet formation	GO:0005789: endoplasmic reticulum membrane;GO:0005811: lipid droplet;GO:0030176: integral component of endoplasmic reticulum membrane;GO:0030176: integral component of endoplasmic reticulum membrane	GO:0005515: protein binding;GO:0005543: phospholipid binding
ENSG00000272196|H2AC19	357.479	2.18986	0.349803	6.26026	3.84347e-10	9.30515e-08	GO:0008150: biological_process;GO:0031507: heterochromatin assembly	GO:0000786: nucleosome;GO:0005634: nucleus;GO:0005634: nucleus;GO:0070062: extracellular exosome	GO:0003674: molecular_function;GO:0003677: DNA binding;GO:0005515: protein binding;GO:0046982: protein heterodimerization activity
ENSG00000102878|HSF4	626.208	2.00683	0.322121	6.23006	4.66265e-10	1.11248e-07	GO:0000122: negative regulation of transcription by RNA polymerase II;GO:0006357: regulation of transcription by RNA polymerase II;GO:0007601: visual perception;GO:0008284: positive regulation of cell population proliferation;GO:0033169: histone H3-K9 demethylation;GO:0045597: positive regulation of cell differentiation;GO:0045944: positive regulation of transcription by RNA polymerase II;GO:0048…	GO:0000785: chromatin;GO:0000785: chromatin;GO:0005634: nucleus;GO:0016607: nuclear speck	GO:0000978: RNA polymerase II cis-regulatory region sequence-specific DNA binding;GO:0000978: RNA polymerase II cis-regulatory region sequence-specific DNA binding;GO:0000981: DNA-binding transcription factor activity, RNA polymerase II-specific;GO:0000981: DNA-binding transcription factor activity, RNA polymerase II-specific;GO:0003700: DNA-binding transcription factor activity;GO:0042802: ident…
ENSG00000263934|SNORD3A	103.325	3.11406	0.500511	6.22177	4.91572e-10	1.15611e-07
ENSG00000143603|KCNN3	700.508	-2.28567	0.367511	-6.21931	4.99333e-10	1.15782e-07	GO:0006811: ion transport;GO:0071805: potassium ion transmembrane transport;GO:0071805: potassium ion transmembrane transport	GO:0005737: cytoplasm;GO:0005886: plasma membrane;GO:0005886: plasma membrane;GO:0016021: integral component of membrane;GO:0043005: neuron projection;GO:0043025: neuronal cell body	GO:0005242: inward rectifier potassium channel activity;GO:0005516: calmodulin binding;GO:0005516: calmodulin binding;GO:0016286: small conductance calcium-activated potassium channel activity;GO:0016286: small conductance calcium-activated potassium channel activity
ENSG00000118898|PPL	3573.53	2.60887	0.42069	6.20141	5.59579e-10	1.27949e-07	GO:0009612: response to mechanical stimulus;GO:0031424: keratinization;GO:0042060: wound healing;GO:0045104: intermediate filament cytoskeleton organization	GO:0001533: cornified envelope;GO:0005737: cytoplasm;GO:0005737: cytoplasm;GO:0005829: cytosol;GO:0005856: cytoskeleton;GO:0005882: intermediate filament;GO:0005886: plasma membrane;GO:0016020: membrane;GO:0030057: desmosome;GO:0070062: extracellular exosome	GO:0005198: structural molecule activity;GO:0005200: structural constituent of cytoskeleton;GO:0005515: protein binding;GO:0045296: cadherin binding
ENSG00000088340|FER1L4	2295.05	1.85713	0.299765	6.19527	5.81847e-10	1.31219e-07
ENSG00000277925|Telomerase-vert	59.0763	3.72559	0.602419	6.18437	6.23491e-10	1.3871e-07
ENSG00000103485|QPRT	1235.29	1.9231	0.311234	6.17893	6.45373e-10	1.41664e-07	GO:0009435: NAD biosynthetic process;GO:0009435: NAD biosynthetic process;GO:0019674: NAD metabolic process;GO:0034213: quinolinate catabolic process;GO:0034213: quinolinate catabolic process;GO:0034213: quinolinate catabolic process	GO:0005737: cytoplasm;GO:0005829: cytosol;GO:0070062: extracellular exosome;GO:1902494: catalytic complex	GO:0004514: nicotinate-nucleotide diphosphorylase (carboxylating) activity;GO:0004514: nicotinate-nucleotide diphosphorylase (carboxylating) activity;GO:0004514: nicotinate-nucleotide diphosphorylase (carboxylating) activity;GO:0005515: protein binding;GO:0042802: identical protein binding
ENSG00000172824|CES4A	71.4517	4.37459	0.711763	6.14613	7.93965e-10	1.71987e-07		GO:0005576: extracellular region	GO:0052689: carboxylic ester hydrolase activity
ENSG00000263740|RN7SL4P	643.012	2.6166	0.427082	6.12669	8.97235e-10	1.91833e-07
ENSG00000131386|GALNT15	104.795	-3.00956	0.495391	-6.07511	1.23901e-09	2.61511e-07	GO:0016266: O-glycan processing	GO:0000139: Golgi membrane;GO:0005794: Golgi apparatus;GO:0016021: integral component of membrane;GO:0030133: transport vesicle	GO:0004653: polypeptide N-acetylgalactosaminyltransferase activity;GO:0005515: protein binding;GO:0030246: carbohydrate binding;GO:0046872: metal ion binding
ENSG00000253633|AP002852.1	517.787	2.12812	0.352082	6.04437	1.49991e-09	3.12569e-07
ENSG00000278834|AC073508.3	63.8139	3.47997	0.576146	6.04009	1.54032e-09	3.16979e-07
ENSG00000185499|MUC1	327.18	2.25012	0.375834	5.98699	2.13755e-09	4.3445e-07	GO:0006977: DNA damage response, signal transduction by p53 class mediator resulting in cell cycle arrest;GO:0006978: DNA damage response, signal transduction by p53 class mediator resulting in transcription of p21 class mediator;GO:0010944: negative regulation of transcription by competitive promoter binding;GO:0033629: negative regulation of cell adhesion mediated by integrin;GO:0036003: positi…	GO:0000785: chromatin;GO:0005615: extracellular space;GO:0005634: nucleus;GO:0005796: Golgi lumen;GO:0005886: plasma membrane;GO:0005886: plasma membrane;GO:0005887: integral component of plasma membrane;GO:0016324: apical plasma membrane;GO:0031982: vesicle;GO:0070062: extracellular exosome;GO:0070062: extracellular exosome	GO:0000978: RNA polymerase II cis-regulatory region sequence-specific DNA binding;GO:0002039: p53 binding;GO:0003712: transcription coregulator activity;GO:0005515: protein binding
ENSG00000126368|NR1D1	724.26	-1.84279	0.309819	-5.94794	2.71534e-09	5.45154e-07	GO:0000122: negative regulation of transcription by RNA polymerase II;GO:0000122: negative regulation of transcription by RNA polymerase II;GO:0000122: negative regulation of transcription by RNA polymerase II;GO:0000122: negative regulation of transcription by RNA polymerase II;GO:0001678: cellular glucose homeostasis;GO:0005978: glycogen biosynthetic process;GO:0009755: hormone-mediated signali…	GO:0000785: chromatin;GO:0000785: chromatin;GO:0005634: nucleus;GO:0005654: nucleoplasm;GO:0005737: cytoplasm;GO:0016604: nuclear body;GO:0030425: dendrite;GO:0043197: dendritic spine	GO:0000976: transcription cis-regulatory region binding;GO:0000977: RNA polymerase II transcription regulatory region sequence-specific DNA binding;GO:0000978: RNA polymerase II cis-regulatory region sequence-specific DNA binding;GO:0000978: RNA polymerase II cis-regulatory region sequence-specific DNA binding;GO:0000978: RNA polymerase II cis-regulatory region sequence-specific DNA binding;GO:00…
ENSG00000150636|CCDC102B	148.456	2.5528	0.429365	5.94552	2.75586e-09	5.46624e-07			GO:0005515: protein binding
ENSG00000081041|CXCL2	753.336	-1.88857	0.31824	-5.93442	2.94891e-09	5.77951e-07	GO:0002237: response to molecule of bacterial origin;GO:0006935: chemotaxis;GO:0006954: inflammatory response;GO:0030593: neutrophil chemotaxis;GO:0061844: antimicrobial humoral immune response mediated by antimicrobial peptide;GO:0070098: chemokine-mediated signaling pathway;GO:0071222: cellular response to lipopolysaccharide	GO:0005576: extracellular region;GO:0005615: extracellular space	GO:0005515: protein binding;GO:0008009: chemokine activity;GO:0045236: CXCR chemokine receptor binding
ENSG00000255508|AP002990.1	4021.62	1.85703	0.313506	5.92342	3.15319e-09	6.10717e-07
ENSG00000278189|RNA5-8SN1	73.3323	3.57455	0.603858	5.91953	3.22871e-09	6.10969e-07
ENSG00000099998|GGT5	84.6029	3.4267	0.578731	5.92105	3.19891e-09	6.10969e-07	GO:0006412: translation;GO:0006508: proteolysis;GO:0006520: cellular amino acid metabolic process;GO:0006631: fatty acid metabolic process;GO:0006750: glutathione biosynthetic process;GO:0006751: glutathione catabolic process;GO:0006751: glutathione catabolic process;GO:0006954: inflammatory response;GO:0007283: spermatogenesis;GO:0032355: response to estradiol;GO:0032496: response to lipopolysac…	GO:0005886: plasma membrane;GO:0005886: plasma membrane;GO:0016021: integral component of membrane;GO:0031226: intrinsic component of plasma membrane	GO:0000048: peptidyltransferase activity;GO:0000048: peptidyltransferase activity;GO:0002951: leukotriene-C(4) hydrolase;GO:0036374: glutathione hydrolase activity;GO:0036374: glutathione hydrolase activity;GO:0102953: hypoglycin A gamma-glutamyl transpeptidase activity;GO:0103068: leukotriene C4 gamma-glutamyl transferase activity
ENSG00000262074|SNORD3B-2	59.1888	3.57258	0.60631	5.89233	3.80787e-09	7.12375e-07
ENSG00000063438|AHRR	139.196	-3.51473	0.598775	-5.86986	4.36159e-09	8.06797e-07	GO:0006357: regulation of transcription by RNA polymerase II;GO:0006805: xenobiotic metabolic process;GO:0030522: intracellular receptor signaling pathway	GO:0000785: chromatin;GO:0005634: nucleus;GO:0005654: nucleoplasm;GO:0005654: nucleoplasm;GO:0005829: cytosol;GO:0034751: aryl hydrocarbon receptor complex	GO:0000976: transcription cis-regulatory region binding;GO:0000981: DNA-binding transcription factor activity, RNA polymerase II-specific;GO:0004879: nuclear receptor activity;GO:0005515: protein binding;GO:0046983: protein dimerization activity
ENSG00000136689|IL1RN	549.663	-1.84135	0.31596	-5.82778	5.61698e-09	1.01618e-06	GO:0002437: inflammatory response to antigenic stimulus;GO:0006629: lipid metabolic process;GO:0006954: inflammatory response;GO:0006955: immune response;GO:0007165: signal transduction;GO:0030073: insulin secretion;GO:0034115: negative regulation of heterotypic cell-cell adhesion;GO:0051384: response to glucocorticoid;GO:2000660: negative regulation of interleukin-1-mediated signaling pathway;GO…	GO:0005615: extracellular space;GO:0005615: extracellular space;GO:0005737: cytoplasm;GO:0005886: plasma membrane;GO:0070062: extracellular exosome	GO:0005125: cytokine activity;GO:0005150: interleukin-1, type I receptor binding;GO:0005151: interleukin-1, type II receptor binding;GO:0005152: interleukin-1 receptor antagonist activity;GO:0005152: interleukin-1 receptor antagonist activity;GO:0005152: interleukin-1 receptor antagonist activity;GO:0005515: protein binding;GO:0045352: interleukin-1 type I receptor antagonist activity;GO:0045353:…
ENSG00000276368|H2AC14	78.9337	3.21814	0.552058	5.82935	5.56433e-09	1.01618e-06
ENSG00000108932|SLC16A6	283.334	-2.0819	0.358093	-5.81385	6.10521e-09	1.0925e-06	GO:0015718: monocarboxylic acid transport;GO:0055085: transmembrane transport	GO:0005887: integral component of plasma membrane;GO:0016020: membrane;GO:0016021: integral component of membrane	GO:0005515: protein binding;GO:0008028: monocarboxylic acid transmembrane transporter activity;GO:0015293: symporter activity
ENSG00000138100|TRIM54	443	1.9582	0.337051	5.80979	6.25495e-09	1.10242e-06	GO:0007017: microtubule-based process;GO:0007026: negative regulation of microtubule depolymerization;GO:0007165: signal transduction;GO:0016567: protein ubiquitination;GO:0030154: cell differentiation	GO:0005737: cytoplasm;GO:0005874: microtubule;GO:0005875: microtubule associated complex;GO:0030018: Z disc	GO:0005515: protein binding;GO:0008017: microtubule binding;GO:0008270: zinc ion binding;GO:0061630: ubiquitin protein ligase activity
ENSG00000274917|RNA5-8SN5	55.4761	3.7121	0.639054	5.80874	6.29458e-09	1.10242e-06		GO:0005840: ribosome	GO:0003735: structural constituent of ribosome
ENSG00000189223|PAX8-AS1	2343.97	-1.62582	0.283226	-5.74035	9.44831e-09	1.63734e-06
ENSG00000276700|RNA5-8SN4	52.6782	3.81416	0.666115	5.72598	1.02841e-08	1.76361e-06
ENSG00000116774|OLFML3	1397.55	1.7103	0.299634	5.70796	1.14337e-08	1.94055e-06		GO:1903561: extracellular vesicle
ENSG00000129422|MTUS1	96.4621	2.81057	0.497306	5.65158	1.58979e-08	2.67069e-06	GO:0010758: regulation of macrophage chemotaxis	GO:0005615: extracellular space;GO:0005634: nucleus;GO:0005730: nucleolus;GO:0005737: cytoplasm;GO:0005739: mitochondrion;GO:0005794: Golgi apparatus;GO:0005815: microtubule organizing center;GO:0005819: spindle;GO:0005874: microtubule;GO:0005886: plasma membrane;GO:0015630: microtubule cytoskeleton	GO:0008017: microtubule binding
ENSG00000120738|EGR1	1603.6	-1.7097	0.302838	-5.6456	1.6461e-08	2.73735e-06	GO:0000122: negative regulation of transcription by RNA polymerase II;GO:0001666: response to hypoxia;GO:0002931: response to ischemia;GO:0006357: regulation of transcription by RNA polymerase II;GO:0009749: response to glucose;GO:0010628: positive regulation of gene expression;GO:0030217: T cell differentiation;GO:0030509: BMP signaling pathway;GO:0032722: positive regulation of chemokine produc…	GO:0000785: chromatin;GO:0000785: chromatin;GO:0005634: nucleus;GO:0005634: nucleus;GO:0005654: nucleoplasm;GO:0005654: nucleoplasm;GO:0005737: cytoplasm;GO:0005737: cytoplasm	GO:0000976: transcription cis-regulatory region binding;GO:0000977: RNA polymerase II transcription regulatory region sequence-specific DNA binding;GO:0000978: RNA polymerase II cis-regulatory region sequence-specific DNA binding;GO:0000981: DNA-binding transcription factor activity, RNA polymerase II-specific;GO:0000981: DNA-binding transcription factor activity, RNA polymerase II-specific;GO:00…
ENSG00000138185|ENTPD1	589.002	-2.85693	0.506534	-5.64015	1.69898e-08	2.76933e-06	GO:0007155: cell adhesion;GO:0007596: blood coagulation;GO:0009134: nucleoside diphosphate catabolic process	GO:0005886: plasma membrane;GO:0005886: plasma membrane;GO:0005887: integral component of plasma membrane;GO:0016020: membrane;GO:0016020: membrane;GO:0070062: extracellular exosome	GO:0004382: guanosine-diphosphatase activity;GO:0005515: protein binding;GO:0005524: ATP binding;GO:0017110: nucleoside-diphosphatase activity;GO:0045134: uridine-diphosphatase activity;GO:0102485: dATP phosphohydrolase activity;GO:0102486: dCTP phosphohydrolase activity;GO:0102487: dUTP phosphohydrolase activity;GO:0102488: dTTP phosphohydrolase activity;GO:0102489: GTP phosphohydrolase activity…
ENSG00000275757|5_8S_rRNA	49.7066	3.82384	0.677888	5.64082	1.69244e-08	2.76933e-06
ENSG00000108342|CSF3	2500.02	-2.08055	0.369794	-5.62626	1.84162e-08	2.97242e-06	GO:0006955: immune response;GO:0007275: multicellular organism development;GO:0008284: positive regulation of cell population proliferation;GO:0014068: positive regulation of phosphatidylinositol 3-kinase signaling;GO:0019221: cytokine-mediated signaling pathway;GO:0030838: positive regulation of actin filament polymerization;GO:0030851: granulocyte differentiation;GO:0032092: positive regulation…	GO:0005576: extracellular region;GO:0005615: extracellular space;GO:0043202: lysosomal lumen;GO:0071682: endocytic vesicle lumen	GO:0005125: cytokine activity;GO:0005125: cytokine activity;GO:0005125: cytokine activity;GO:0005130: granulocyte colony-stimulating factor receptor binding;GO:0008083: growth factor activity;GO:0019899: enzyme binding
ENSG00000237289|CKMT1B	54.6945	3.37526	0.60137	5.61262	1.99287e-08	3.1853e-06	GO:0016310: phosphorylation;GO:0046314: phosphocreatine biosynthetic process	GO:0005739: mitochondrion;GO:0005743: mitochondrial inner membrane	GO:0004111: creatine kinase activity;GO:0005515: protein binding;GO:0005524: ATP binding;GO:0016301: kinase activity
ENSG00000273730|5_8S_rRNA	50.3485	3.74432	0.670651	5.58311	2.36258e-08	3.73991e-06
ENSG00000196611|MMP1	3289.54	-1.65883	0.298723	-5.55308	2.80684e-08	4.40086e-06	GO:0006508: proteolysis;GO:0022617: extracellular matrix disassembly;GO:0030198: extracellular matrix organization;GO:0030574: collagen catabolic process;GO:0030574: collagen catabolic process;GO:0031334: positive regulation of protein-containing complex assembly;GO:0044267: cellular protein metabolic process;GO:0071492: cellular response to UV-A	GO:0005576: extracellular region;GO:0031012: extracellular matrix	GO:0004175: endopeptidase activity;GO:0004222: metalloendopeptidase activity;GO:0004222: metalloendopeptidase activity;GO:0004222: metalloendopeptidase activity;GO:0004252: serine-type endopeptidase activity;GO:0008233: peptidase activity;GO:0008270: zinc ion binding
ENSG00000103569|AQP9	1084.97	1.66283	0.301525	5.51473	3.49322e-08	5.42537e-06	GO:0006833: water transport;GO:0006833: water transport;GO:0006863: purine nucleobase transport;GO:0006970: response to osmotic stress;GO:0007588: excretion;GO:0010033: response to organic substance;GO:0015722: canalicular bile acid transport;GO:0015791: polyol transport;GO:0015793: glycerol transport;GO:0015793: glycerol transport;GO:0015793: glycerol transport;GO:0015837: amine transport;GO:001…	GO:0005886: plasma membrane;GO:0005886: plasma membrane;GO:0005887: integral component of plasma membrane;GO:0016021: integral component of membrane;GO:0016323: basolateral plasma membrane;GO:0016323: basolateral plasma membrane;GO:0043231: intracellular membrane-bounded organelle	GO:0005275: amine transmembrane transporter activity;GO:0005345: purine nucleobase transmembrane transporter activity;GO:0005350: pyrimidine nucleobase transmembrane transporter activity;GO:0005372: water transmembrane transporter activity;GO:0005515: protein binding;GO:0015166: polyol transmembrane transporter activity;GO:0015204: urea transmembrane transporter activity;GO:0015250: water channel…
ENSG00000159388|BTG2	347.533	2.06227	0.375172	5.49686	3.86619e-08	5.94852e-06	GO:0000122: negative regulation of transcription by RNA polymerase II;GO:0006281: DNA repair;GO:0006479: protein methylation;GO:0006974: cellular response to DNA damage stimulus;GO:0008285: negative regulation of cell population proliferation;GO:0008285: negative regulation of cell population proliferation;GO:0008306: associative learning;GO:0009612: response to mechanical stimulus;GO:0009952: an…	GO:0005634: nucleus;GO:0005737: cytoplasm;GO:0005829: cytosol;GO:0070062: extracellular exosome	GO:0003714: transcription corepressor activity;GO:0005515: protein binding
ENSG00000169429|CXCL8	9721.05	-1.6527	0.30175	-5.47705	4.3247e-08	6.59236e-06	GO:0001525: angiogenesis;GO:0002237: response to molecule of bacterial origin;GO:0006935: chemotaxis;GO:0006954: inflammatory response;GO:0006954: inflammatory response;GO:0007165: signal transduction;GO:0007186: G protein-coupled receptor signaling pathway;GO:0008285: negative regulation of cell population proliferation;GO:0010628: positive regulation of gene expression;GO:0010629: negative regu…	GO:0005576: extracellular region;GO:0005615: extracellular space	GO:0005153: interleukin-8 receptor binding;GO:0005515: protein binding;GO:0008009: chemokine activity;GO:0008009: chemokine activity;GO:0008009: chemokine activity;GO:0045236: CXCR chemokine receptor binding
ENSG00000143387|CTSK	1908.54	1.69605	0.309796	5.47474	4.38162e-08	6.61785e-06	GO:0000422: autophagy of mitochondrion;GO:0001957: intramembranous ossification;GO:0006508: proteolysis;GO:0006590: thyroid hormone generation;GO:0006955: immune response;GO:0022617: extracellular matrix disassembly;GO:0030574: collagen catabolic process;GO:0030574: collagen catabolic process;GO:0045453: bone resorption;GO:0051603: proteolysis involved in cellular protein catabolic process;GO:005…	GO:0005576: extracellular region;GO:0005615: extracellular space;GO:0005615: extracellular space;GO:0005654: nucleoplasm;GO:0005764: lysosome;GO:0005764: lysosome;GO:0009897: external side of plasma membrane;GO:0016324: apical plasma membrane;GO:0036021: endolysosome lumen;GO:0043202: lysosomal lumen;GO:0043231: intracellular membrane-bounded organelle	GO:0001968: fibronectin binding;GO:0004197: cysteine-type endopeptidase activity;GO:0004197: cysteine-type endopeptidase activity;GO:0004252: serine-type endopeptidase activity;GO:0005515: protein binding;GO:0005518: collagen binding;GO:0008234: cysteine-type peptidase activity;GO:0043394: proteoglycan binding
ENSG00000102886|GDPD3	990.217	1.78292	0.325989	5.46928	4.51877e-08	6.70202e-06	GO:0034638: phosphatidylcholine catabolic process;GO:0046475: glycerophospholipid catabolic process;GO:0070291: N-acylethanolamine metabolic process	GO:0005783: endoplasmic reticulum;GO:0005789: endoplasmic reticulum membrane;GO:0005789: endoplasmic reticulum membrane;GO:0016021: integral component of membrane;GO:0048471: perinuclear region of cytoplasm;GO:0070062: extracellular exosome	GO:0004622: lysophospholipase activity;GO:0008081: phosphoric diester hydrolase activity;GO:0008081: phosphoric diester hydrolase activity;GO:0046872: metal ion binding
ENSG00000107281|NPDC1	51.4799	3.59549	0.657397	5.46928	4.51868e-08	6.70202e-06		GO:0005886: plasma membrane;GO:0016021: integral component of membrane	GO:0005515: protein binding
ENSG00000106538|RARRES2	42.8447	4.0748	0.745658	5.4647	4.63678e-08	6.81566e-06	GO:0001523: retinoid metabolic process;GO:0001934: positive regulation of protein phosphorylation;GO:0003084: positive regulation of systemic arterial blood pressure;GO:0006935: chemotaxis;GO:0006954: inflammatory response;GO:0008286: insulin receptor signaling pathway;GO:0010759: positive regulation of macrophage chemotaxis;GO:0014823: response to activity;GO:0019732: antifungal humoral response…	GO:0005576: extracellular region;GO:0005576: extracellular region;GO:0005615: extracellular space;GO:0005615: extracellular space;GO:0031012: extracellular matrix;GO:0031089: platelet dense granule lumen;GO:0062023: collagen-containing extracellular matrix	GO:0005102: signaling receptor binding;GO:0005102: signaling receptor binding;GO:0005515: protein binding
ENSG00000168298|H1-4	166.42	3.11357	0.570594	5.45671	4.85042e-08	7.06659e-06	GO:0006334: nucleosome assembly;GO:0016584: nucleosome positioning;GO:0030261: chromosome condensation;GO:0045910: negative regulation of DNA recombination	GO:0000786: nucleosome;GO:0000792: heterochromatin;GO:0005634: nucleus;GO:0005634: nucleus	GO:0003690: double-stranded DNA binding;GO:0003723: RNA binding;GO:0005509: calcium ion binding;GO:0005515: protein binding;GO:0005524: ATP binding;GO:0005525: GTP binding;GO:0016208: AMP binding;GO:0031490: chromatin DNA binding;GO:0031492: nucleosomal DNA binding;GO:0032564: dATP binding;GO:0043531: ADP binding
ENSG00000130592|LSP1	101.155	2.53755	0.465566	5.45047	5.0236e-08	7.2547e-06	GO:0006935: chemotaxis;GO:0006968: cellular defense response;GO:0007165: signal transduction;GO:0098761: cellular response to interleukin-7	GO:0005886: plasma membrane;GO:0015629: actin cytoskeleton;GO:0016020: membrane;GO:0070062: extracellular exosome	GO:0003779: actin binding
ENSG00000091129|NRCAM	139.006	2.49023	0.457038	5.44863	5.076e-08	7.26662e-06	GO:0001525: angiogenesis;GO:0001764: neuron migration;GO:0007409: axonogenesis;GO:0007411: axon guidance;GO:0007411: axon guidance;GO:0007413: axonal fasciculation;GO:0007416: synapse assembly;GO:0007417: central nervous system development;GO:0007420: brain development;GO:0030516: regulation of axon extension;GO:0045162: clustering of voltage-gated sodium channels;GO:0045666: positive regulation …	GO:0005576: extracellular region;GO:0005886: plasma membrane;GO:0005886: plasma membrane;GO:0005887: integral component of plasma membrane;GO:0009897: external side of plasma membrane;GO:0030424: axon;GO:0043005: neuron projection;GO:0043194: axon initial segment	GO:0005515: protein binding;GO:0030506: ankyrin binding;GO:0098632: cell-cell adhesion mediator activity
ENSG00000184497|TMEM255B	381.7	1.83285	0.338727	5.41101	6.26714e-08	8.89448e-06		GO:0016021: integral component of membrane	GO:0005515: protein binding
ENSG00000101255|TRIB3	120.181	-2.35185	0.436438	-5.38873	7.09572e-08	9.98434e-06	GO:0000122: negative regulation of transcription by RNA polymerase II;GO:0006468: protein phosphorylation;GO:0006469: negative regulation of protein kinase activity;GO:0010506: regulation of autophagy;GO:0010827: regulation of glucose transmembrane transport;GO:0032092: positive regulation of protein binding;GO:0032436: positive regulation of proteasomal ubiquitin-dependent protein catabolic proc…	GO:0005634: nucleus;GO:0005634: nucleus;GO:0005654: nucleoplasm;GO:0005654: nucleoplasm;GO:0005829: cytosol;GO:0005886: plasma membrane	GO:0003714: transcription corepressor activity;GO:0004860: protein kinase inhibitor activity;GO:0005515: protein binding;GO:0005524: ATP binding;GO:0016301: kinase activity;GO:0019901: protein kinase binding;GO:0019901: protein kinase binding;GO:0031434: mitogen-activated protein kinase kinase binding;GO:0031625: ubiquitin protein ligase binding;GO:0055106: ubiquitin-protein transferase regulator…
ENSG00000184357|H1-5	128.971	2.59336	0.481596	5.38493	7.24738e-08	1.01113e-05	GO:0000122: negative regulation of transcription by RNA polymerase II;GO:0006325: chromatin organization;GO:0006334: nucleosome assembly;GO:0016584: nucleosome positioning;GO:0030261: chromosome condensation;GO:0030307: positive regulation of cell growth;GO:0045910: negative regulation of DNA recombination;GO:0050821: protein stabilization;GO:0051574: positive regulation of histone H3-K9 methylat…	GO:0000785: chromatin;GO:0000786: nucleosome;GO:0000792: heterochromatin;GO:0005634: nucleus;GO:0005634: nucleus	GO:0003690: double-stranded DNA binding;GO:0003723: RNA binding;GO:0005515: protein binding;GO:0031490: chromatin DNA binding;GO:0031492: nucleosomal DNA binding;GO:0042826: histone deacetylase binding
ENSG00000164181|ELOVL7	318.886	-1.83537	0.340996	-5.38236	7.3514e-08	1.01703e-05	GO:0006636: unsaturated fatty acid biosynthetic process;GO:0019367: fatty acid elongation, saturated fatty acid;GO:0019367: fatty acid elongation, saturated fatty acid;GO:0030148: sphingolipid biosynthetic process;GO:0034625: fatty acid elongation, monounsaturated fatty acid;GO:0034626: fatty acid elongation, polyunsaturated fatty acid;GO:0034626: fatty acid elongation, polyunsaturated fatty acid…	GO:0005783: endoplasmic reticulum;GO:0005789: endoplasmic reticulum membrane;GO:0030176: integral component of endoplasmic reticulum membrane	GO:0005515: protein binding;GO:0009922: fatty acid elongase activity;GO:0009922: fatty acid elongase activity;GO:0009922: fatty acid elongase activity;GO:0102336: 3-oxo-arachidoyl-CoA synthase activity;GO:0102337: 3-oxo-cerotoyl-CoA synthase activity;GO:0102338: 3-oxo-lignoceronyl-CoA synthase activity;GO:0102756: very-long-chain 3-ketoacyl-CoA synthase activity
ENSG00000152582|SPEF2	522.386	1.81549	0.337444	5.38014	7.44295e-08	1.02111e-05	GO:0003351: epithelial cilium movement involved in extracellular fluid movement;GO:0007283: spermatogenesis;GO:0007288: sperm axoneme assembly;GO:0007288: sperm axoneme assembly;GO:0007288: sperm axoneme assembly;GO:0048705: skeletal system morphogenesis;GO:0048854: brain morphogenesis;GO:0060541: respiratory system development	GO:0002177: manchette;GO:0002177: manchette;GO:0005576: extracellular region;GO:0005737: cytoplasm;GO:0005794: Golgi apparatus;GO:0036126: sperm flagellum;GO:0097225: sperm midpiece;GO:0097225: sperm midpiece	GO:0003674: molecular_function
ENSG00000020181|ADGRA2	280.977	2.92039	0.543695	5.37137	7.81407e-08	1.06317e-05	GO:0002040: sprouting angiogenesis;GO:0002040: sprouting angiogenesis;GO:0007166: cell surface receptor signaling pathway;GO:0007186: G protein-coupled receptor signaling pathway;GO:0007417: central nervous system development;GO:0007417: central nervous system development;GO:0010595: positive regulation of endothelial cell migration;GO:0016055: Wnt signaling pathway;GO:0043542: endothelial cell m…	GO:0005886: plasma membrane;GO:0005886: plasma membrane;GO:0009986: cell surface;GO:0016021: integral component of membrane;GO:0030175: filopodium;GO:1990909: Wnt signalosome;GO:1990909: Wnt signalosome	GO:0004930: G protein-coupled receptor activity;GO:0005515: protein binding
ENSG00000008086|CDKL5	168.86	-2.10368	0.392719	-5.35671	8.47528e-08	1.14368e-05	GO:0001764: neuron migration;GO:0006468: protein phosphorylation;GO:0043547: positive regulation of GTPase activity;GO:0045773: positive regulation of axon extension;GO:0045773: positive regulation of axon extension;GO:0046777: protein autophosphorylation;GO:0050773: regulation of dendrite development;GO:0050773: regulation of dendrite development;GO:0050775: positive regulation of dendrite morph…	GO:0005634: nucleus;GO:0005634: nucleus;GO:0005654: nucleoplasm;GO:0005813: centrosome;GO:0032587: ruffle membrane;GO:0032839: dendrite cytoplasm;GO:0032839: dendrite cytoplasm;GO:0036064: ciliary basal body;GO:0044294: dendritic growth cone;GO:0048471: perinuclear region of cytoplasm;GO:0097542: ciliary tip;GO:0098978: glutamatergic synapse;GO:0098978: glutamatergic synapse;GO:0098978: glutamate…	GO:0004672: protein kinase activity;GO:0004674: protein serine/threonine kinase activity;GO:0004674: protein serine/threonine kinase activity;GO:0004693: cyclin-dependent protein serine/threonine kinase activity;GO:0005515: protein binding;GO:0005524: ATP binding;GO:0016301: kinase activity;GO:0031267: small GTPase binding;GO:0106310: protein serine kinase activity
ENSG00000211459|MT-RNR1	7490	1.584	0.295929	5.35262	8.66876e-08	1.16028e-05
ENSG00000273540|AGBL1	162.323	3.09047	0.579031	5.33732	9.43288e-08	1.24235e-05	GO:0006508: proteolysis;GO:0035609: C-terminal protein deglutamylation;GO:0035609: C-terminal protein deglutamylation;GO:0035610: protein side chain deglutamylation;GO:0035610: protein side chain deglutamylation	GO:0005829: cytosol	GO:0004181: metallocarboxypeptidase activity;GO:0008270: zinc ion binding;GO:0015631: tubulin binding
ENSG00000185565|LSAMP	471.794	-2.02386	0.379093	-5.33868	9.36236e-08	1.24235e-05	GO:0007155: cell adhesion;GO:0007399: nervous system development	GO:0005576: extracellular region;GO:0005829: cytosol;GO:0005886: plasma membrane;GO:0031225: anchored component of membrane	GO:0005515: protein binding
ENSG00000225756|DBH-AS1	312.136	2.28087	0.428911	5.31783	1.05011e-07	1.37206e-05
ENSG00000128052|KDR	326.731	-2.0448	0.385728	-5.30116	1.15068e-07	1.49162e-05	GO:0001525: angiogenesis;GO:0001525: angiogenesis;GO:0001569: branching involved in blood vessel morphogenesis;GO:0001570: vasculogenesis;GO:0001934: positive regulation of protein phosphorylation;GO:0001938: positive regulation of endothelial cell proliferation;GO:0002042: cell migration involved in sprouting angiogenesis;GO:0002244: hematopoietic progenitor cell differentiation;GO:0003158: endo…	GO:0005576: extracellular region;GO:0005634: nucleus;GO:0005768: endosome;GO:0005769: early endosome;GO:0005783: endoplasmic reticulum;GO:0005794: Golgi apparatus;GO:0005886: plasma membrane;GO:0005886: plasma membrane;GO:0005886: plasma membrane;GO:0005887: integral component of plasma membrane;GO:0005887: integral component of plasma membrane;GO:0030054: cell junction;GO:0043235: receptor compl…	GO:0004713: protein tyrosine kinase activity;GO:0004713: protein tyrosine kinase activity;GO:0004714: transmembrane receptor protein tyrosine kinase activity;GO:0004714: transmembrane receptor protein tyrosine kinase activity;GO:0005021: vascular endothelial growth factor-activated receptor activity;GO:0005178: integrin binding;GO:0005515: protein binding;GO:0005524: ATP binding;GO:0019838: growt…
ENSG00000107485|GATA3	67.4742	-2.93155	0.556483	-5.268	1.3792e-07	1.77388e-05	GO:0000122: negative regulation of transcription by RNA polymerase II;GO:0001701: in utero embryonic development;GO:0001709: cell fate determination;GO:0001764: neuron migration;GO:0001806: type IV hypersensitivity;GO:0001817: regulation of cytokine production;GO:0001822: kidney development;GO:0001823: mesonephros development;GO:0002088: lens development in camera-type eye;GO:0002520: immune syst…	GO:0000785: chromatin;GO:0000785: chromatin;GO:0005634: nucleus;GO:0005654: nucleoplasm;GO:0005654: nucleoplasm	GO:0000976: transcription cis-regulatory region binding;GO:0000978: RNA polymerase II cis-regulatory region sequence-specific DNA binding;GO:0000978: RNA polymerase II cis-regulatory region sequence-specific DNA binding;GO:0000981: DNA-binding transcription factor activity, RNA polymerase II-specific;GO:0000981: DNA-binding transcription factor activity, RNA polymerase II-specific;GO:0000981: DNA…
ENSG00000095752|IL11	713.353	-1.77206	0.338332	-5.23765	1.62636e-07	2.07556e-05	GO:0007165: signal transduction;GO:0008284: positive regulation of cell population proliferation;GO:0008284: positive regulation of cell population proliferation;GO:0030183: B cell differentiation;GO:0030219: megakaryocyte differentiation;GO:0033138: positive regulation of peptidyl-serine phosphorylation;GO:0043410: positive regulation of MAPK cascade;GO:0043410: positive regulation of MAPK casca…	GO:0005576: extracellular region;GO:0005615: extracellular space;GO:0005737: cytoplasm	GO:0005125: cytokine activity;GO:0005142: interleukin-11 receptor binding;GO:0005515: protein binding;GO:0008083: growth factor activity;GO:0008083: growth factor activity
ENSG00000175592|FOSL1	28351.1	-1.53133	0.292963	-5.22705	1.72237e-07	2.18118e-05	GO:0001701: in utero embryonic development;GO:0006357: regulation of transcription by RNA polymerase II;GO:0006935: chemotaxis;GO:0006968: cellular defense response;GO:0007296: vitellogenesis;GO:0007565: female pregnancy;GO:0007612: learning;GO:0008284: positive regulation of cell population proliferation;GO:0008285: negative regulation of cell population proliferation;GO:0009410: response to xen…	GO:0000785: chromatin;GO:0005634: nucleus;GO:0005654: nucleoplasm;GO:0005829: cytosol;GO:0042734: presynaptic membrane;GO:0043005: neuron projection	GO:0000978: RNA polymerase II cis-regulatory region sequence-specific DNA binding;GO:0000978: RNA polymerase II cis-regulatory region sequence-specific DNA binding;GO:0000981: DNA-binding transcription factor activity, RNA polymerase II-specific;GO:0000981: DNA-binding transcription factor activity, RNA polymerase II-specific;GO:0001228: DNA-binding transcription activator activity, RNA polymeras…
ENSG00000177106|EPS8L2	618.015	1.60652	0.307527	5.22402	1.75084e-07	2.20031e-05	GO:0007266: Rho protein signal transduction;GO:0007266: Rho protein signal transduction;GO:0007605: sensory perception of sound;GO:0035023: regulation of Rho protein signal transduction;GO:0035023: regulation of Rho protein signal transduction;GO:0050790: regulation of catalytic activity;GO:1900029: positive regulation of ruffle assembly;GO:1900029: positive regulation of ruffle assembly	GO:0005829: cytosol;GO:0005886: plasma membrane;GO:0005886: plasma membrane;GO:0031982: vesicle;GO:0032421: stereocilium bundle;GO:0032426: stereocilium tip;GO:0032587: ruffle membrane;GO:0032587: ruffle membrane;GO:0032991: protein-containing complex;GO:0070062: extracellular exosome	GO:0003779: actin binding;GO:0003779: actin binding;GO:0005085: guanyl-nucleotide exchange factor activity;GO:0005515: protein binding;GO:0045296: cadherin binding
ENSG00000154265|ABCA5	370.423	2.19544	0.421357	5.21039	1.88439e-07	2.35021e-05	GO:0006869: lipid transport;GO:0006869: lipid transport;GO:0008203: cholesterol metabolic process;GO:0010745: negative regulation of macrophage derived foam cell differentiation;GO:0010874: regulation of cholesterol efflux;GO:0010874: regulation of cholesterol efflux;GO:0033344: cholesterol efflux;GO:0034375: high-density lipoprotein particle remodeling;GO:0042632: cholesterol homeostasis;GO:0043…	GO:0000139: Golgi membrane;GO:0005764: lysosome;GO:0005765: lysosomal membrane;GO:0005770: late endosome;GO:0005770: late endosome;GO:0005794: Golgi apparatus;GO:0005886: plasma membrane;GO:0016021: integral component of membrane;GO:0031902: late endosome membrane;GO:0043231: intracellular membrane-bounded organelle	GO:0005319: lipid transporter activity;GO:0005319: lipid transporter activity;GO:0005524: ATP binding;GO:0042626: ATPase-coupled transmembrane transporter activity;GO:0140359: ABC-type transporter activity
ENSG00000108387|SEPTIN4	151.258	2.16777	0.418152	5.18417	2.16982e-07	2.68584e-05	GO:0001764: neuron migration;GO:0006915: apoptotic process;GO:0017157: regulation of exocytosis;GO:0030317: flagellated sperm motility;GO:0031398: positive regulation of protein ubiquitination;GO:0034613: cellular protein localization;GO:0042981: regulation of apoptotic process;GO:0043065: positive regulation of apoptotic process;GO:0048515: spermatid differentiation;GO:0061640: cytoskeleton-depe…	GO:0005634: nucleus;GO:0005654: nucleoplasm;GO:0005739: mitochondrion;GO:0005741: mitochondrial outer membrane;GO:0005829: cytosol;GO:0005940: septin ring;GO:0008021: synaptic vesicle;GO:0015630: microtubule cytoskeleton;GO:0030424: axon;GO:0030425: dendrite;GO:0031105: septin complex;GO:0031105: septin complex;GO:0031105: septin complex;GO:0032153: cell division site;GO:0043204: perikaryon;GO:00…	GO:0000287: magnesium ion binding;GO:0003924: GTPase activity;GO:0003924: GTPase activity;GO:0005198: structural molecule activity;GO:0005515: protein binding;GO:0005525: GTP binding;GO:0042802: identical protein binding;GO:0060090: molecular adaptor activity
ENSG00000255663|AP002373.1	70.9486	-3.83533	0.740678	-5.17813	2.24115e-07	2.73551e-05
ENSG00000278677|H2AC17	67.9207	2.79968	0.540691	5.17797	2.24317e-07	2.73551e-05	GO:0008150: biological_process;GO:0031507: heterochromatin assembly	GO:0000786: nucleosome;GO:0005634: nucleus;GO:0005634: nucleus;GO:0070062: extracellular exosome	GO:0003677: DNA binding;GO:0005515: protein binding;GO:0019899: enzyme binding;GO:0046982: protein heterodimerization activity
ENSG00000157873|TNFRSF14	193.552	2.15004	0.41554	5.17408	2.29033e-07	2.77248e-05	GO:0002250: adaptive immune response;GO:0002720: positive regulation of cytokine production involved in immune response;GO:0006955: immune response;GO:0007166: cell surface receptor signaling pathway;GO:0031295: T cell costimulation;GO:0033209: tumor necrosis factor-mediated signaling pathway;GO:0045087: innate immune response;GO:0046642: negative regulation of alpha-beta T cell proliferation;GO:…	GO:0005886: plasma membrane;GO:0005886: plasma membrane;GO:0009897: external side of plasma membrane;GO:0016021: integral component of membrane	GO:0001618: virus receptor activity;GO:0005031: tumor necrosis factor-activated receptor activity;GO:0005515: protein binding;GO:0019955: cytokine binding;GO:0031625: ubiquitin protein ligase binding
ENSG00000118307|CASC1	214.801	2.19655	0.428011	5.13199	2.86688e-07	3.43057e-05		GO:0005858: axonemal dynein complex;GO:0005929: cilium;GO:0005930: axoneme	GO:0005515: protein binding;GO:0008017: microtubule binding;GO:0008017: microtubule binding;GO:0048487: beta-tubulin binding;GO:0048487: beta-tubulin binding
ENSG00000181885|CLDN7	183.788	2.29884	0.447993	5.13142	2.87566e-07	3.43057e-05	GO:0007155: cell adhesion;GO:0016338: calcium-independent cell-cell adhesion via plasma membrane cell-adhesion molecules;GO:0070830: bicellular tight junction assembly	GO:0005886: plasma membrane;GO:0005886: plasma membrane;GO:0005923: bicellular tight junction;GO:0005923: bicellular tight junction;GO:0016021: integral component of membrane;GO:0016323: basolateral plasma membrane	GO:0005198: structural molecule activity;GO:0005515: protein binding;GO:0042802: identical protein binding
ENSG00000108953|YWHAE	51535.2	-1.43973	0.282006	-5.10531	3.30252e-07	3.88353e-05	GO:0000165: MAPK cascade;GO:0003064: regulation of heart rate by hormone;GO:0007165: signal transduction;GO:0007346: regulation of mitotic cell cycle;GO:0021762: substantia nigra development;GO:0034504: protein localization to nucleus;GO:0034605: cellular response to heat;GO:0034613: cellular protein localization;GO:0035556: intracellular signal transduction;GO:0046827: positive regulation of pro…	GO:0005634: nucleus;GO:0005737: cytoplasm;GO:0005737: cytoplasm;GO:0005829: cytosol;GO:0005829: cytosol;GO:0005871: kinesin complex;GO:0005886: plasma membrane;GO:0005925: focal adhesion;GO:0016020: membrane;GO:0042470: melanosome;GO:0070062: extracellular exosome;GO:0090724: central region of growth cone;GO:0098978: glutamatergic synapse	GO:0003723: RNA binding;GO:0005246: calcium channel regulator activity;GO:0005515: protein binding;GO:0015459: potassium channel regulator activity;GO:0019899: enzyme binding;GO:0023026: MHC class II protein complex binding;GO:0031625: ubiquitin protein ligase binding;GO:0042802: identical protein binding;GO:0042826: histone deacetylase binding;GO:0044325: transmembrane transporter binding;GO:004…
ENSG00000129990|SYT5	142.713	2.30331	0.451049	5.10655	3.28088e-07	3.88353e-05	GO:0007268: chemical synaptic transmission;GO:0014059: regulation of dopamine secretion;GO:0016192: vesicle-mediated transport;GO:0017156: calcium-ion regulated exocytosis;GO:0017158: regulation of calcium ion-dependent exocytosis;GO:0048488: synaptic vesicle endocytosis;GO:0048791: calcium ion-regulated exocytosis of neurotransmitter;GO:0071277: cellular response to calcium ion	GO:0005886: plasma membrane;GO:0030424: axon;GO:0030672: synaptic vesicle membrane;GO:0031045: dense core granule;GO:0043025: neuronal cell body;GO:0048471: perinuclear region of cytoplasm;GO:0055038: recycling endosome membrane;GO:0070382: exocytic vesicle;GO:0099066: integral component of neuronal dense core vesicle membrane;GO:1990769: proximal neuron projection	GO:0000149: SNARE binding;GO:0001786: phosphatidylserine binding;GO:0005509: calcium ion binding;GO:0005509: calcium ion binding;GO:0005544: calcium-dependent phospholipid binding;GO:0005546: phosphatidylinositol-4,5-bisphosphate binding;GO:0019905: syntaxin binding;GO:0030276: clathrin binding;GO:0046982: protein heterodimerization activity
ENSG00000153404|PLEKHG4B	2595.25	-1.43203	0.282586	-5.06758	4.029e-07	4.70422e-05	GO:0050790: regulation of catalytic activity;GO:0051056: regulation of small GTPase mediated signal transduction	GO:0005829: cytosol	GO:0005085: guanyl-nucleotide exchange factor activity;GO:0005515: protein binding
ENSG00000171962|DRC3	289.025	1.94446	0.384142	5.06183	4.15257e-07	4.81435e-05		GO:0005737: cytoplasm;GO:0005930: axoneme;GO:0031514: motile cilium	GO:0005515: protein binding
ENSG00000172061|LRRC15	6241.23	-2.07575	0.410596	-5.05545	4.29373e-07	4.94319e-05	GO:0030335: positive regulation of cell migration;GO:0046813: receptor-mediated virion attachment to host cell;GO:1903077: negative regulation of protein localization to plasma membrane	GO:0005615: extracellular space;GO:0016021: integral component of membrane;GO:0031012: extracellular matrix;GO:0062023: collagen-containing extracellular matrix;GO:0070062: extracellular exosome	GO:0001968: fibronectin binding;GO:0005518: collagen binding;GO:0043236: laminin binding
ENSG00000144802|NFKBIZ	3664.58	-1.76234	0.348764	-5.05311	4.34674e-07	4.96947e-05	GO:0006954: inflammatory response;GO:0010468: regulation of gene expression;GO:0050729: positive regulation of inflammatory response;GO:0050852: T cell receptor signaling pathway;GO:2000321: positive regulation of T-helper 17 cell differentiation	GO:0005634: nucleus;GO:0016607: nuclear speck;GO:0036464: cytoplasmic ribonucleoprotein granule	GO:0005515: protein binding
ENSG00000131459|GFPT2	14723.2	-1.66014	0.329109	-5.04436	4.55047e-07	5.16651e-05	GO:0006002: fructose 6-phosphate metabolic process;GO:0006047: UDP-N-acetylglucosamine metabolic process;GO:0006048: UDP-N-acetylglucosamine biosynthetic process;GO:0006048: UDP-N-acetylglucosamine biosynthetic process;GO:0006112: energy reserve metabolic process;GO:0006487: protein N-linked glycosylation;GO:0006541: glutamine metabolic process;GO:1990830: cellular response to leukemia inhibitory…	GO:0005829: cytosol	GO:0004360: glutamine-fructose-6-phosphate transaminase (isomerizing) activity;GO:0004360: glutamine-fructose-6-phosphate transaminase (isomerizing) activity;GO:0005515: protein binding;GO:0097367: carbohydrate derivative binding
ENSG00000102032|RENBP	501.697	1.80902	0.358862	5.04099	4.63129e-07	5.22225e-05	GO:0005975: carbohydrate metabolic process;GO:0006044: N-acetylglucosamine metabolic process;GO:0006051: N-acetylmannosamine metabolic process;GO:0008217: regulation of blood pressure;GO:0010951: negative regulation of endopeptidase activity;GO:0019262: N-acetylneuraminate catabolic process;GO:0019262: N-acetylneuraminate catabolic process	GO:0005829: cytosol;GO:0070062: extracellular exosome	GO:0004866: endopeptidase inhibitor activity;GO:0005515: protein binding;GO:0005524: ATP binding;GO:0030414: peptidase inhibitor activity;GO:0042802: identical protein binding;GO:0050121: N-acylglucosamine 2-epimerase activity;GO:0050121: N-acylglucosamine 2-epimerase activity
ENSG00000128510|CPA4	3686.33	1.53977	0.306988	5.01575	5.28271e-07	5.91628e-05	GO:0006508: proteolysis;GO:0016573: histone acetylation	GO:0005575: cellular_component;GO:0005615: extracellular space	GO:0004181: metallocarboxypeptidase activity;GO:0004181: metallocarboxypeptidase activity;GO:0008270: zinc ion binding
ENSG00000162745|OLFML2B	1192.15	1.5706	0.313482	5.01016	5.43844e-07	6.04953e-05	GO:0030198: extracellular matrix organization	GO:0005576: extracellular region;GO:0031012: extracellular matrix	GO:0042802: identical protein binding;GO:0050840: extracellular matrix binding
ENSG00000261408|TEN1-CDK3	583.057	2.41902	0.484119	4.99675	5.83036e-07	6.44196e-05
ENSG00000151012|SLC7A11	604.402	-1.85482	0.371473	-4.99315	5.94028e-07	6.48516e-05	GO:0003333: amino acid transmembrane transport;GO:0006749: glutathione metabolic process;GO:0008542: visual learning;GO:0009636: response to toxic substance;GO:0014070: response to organic cyclic compound;GO:0021591: ventricular system development;GO:0021756: striatum development;GO:0030534: adult behavior;GO:0033029: regulation of neutrophil apoptotic process;GO:0034599: cellular response to oxi…	GO:0005791: rough endoplasmic reticulum;GO:0005856: cytoskeleton;GO:0005886: plasma membrane;GO:0009986: cell surface;GO:0016021: integral component of membrane;GO:0031526: brush border membrane;GO:0045177: apical part of cell;GO:0097449: astrocyte projection	GO:0005515: protein binding;GO:0015179: L-amino acid transmembrane transporter activity;GO:0015327: cystine:glutamate antiporter activity
ENSG00000105835|NAMPT	33618.8	-1.37196	0.274783	-4.99289	5.94825e-07	6.48516e-05	GO:0001774: microglial cell activation;GO:0007165: signal transduction;GO:0007267: cell-cell signaling;GO:0007565: female pregnancy;GO:0007568: aging;GO:0008284: positive regulation of cell population proliferation;GO:0008286: insulin receptor signaling pathway;GO:0009435: NAD biosynthetic process;GO:0010507: negative regulation of autophagy;GO:0014070: response to organic cyclic compound;GO:0014…	GO:0005829: cytosol;GO:0005886: plasma membrane;GO:0016607: nuclear speck;GO:0030054: cell junction;GO:0070062: extracellular exosome	GO:0000166: nucleotide binding;GO:0004514: nicotinate-nucleotide diphosphorylase (carboxylating) activity;GO:0005125: cytokine activity;GO:0005515: protein binding;GO:0042802: identical protein binding;GO:0047280: nicotinamide phosphoribosyltransferase activity;GO:0047280: nicotinamide phosphoribosyltransferase activity
ENSG00000182809|CRIP2	1587.7	1.4377	0.288048	4.99119	6.001e-07	6.49963e-05	GO:0008284: positive regulation of cell population proliferation;GO:0030097: hemopoiesis	GO:0005938: cell cortex	GO:0005515: protein binding;GO:0008270: zinc ion binding
ENSG00000138829|FBN2	1528.44	-1.87683	0.376931	-4.97924	6.3836e-07	6.86884e-05	GO:0009653: anatomical structure morphogenesis;GO:0030326: embryonic limb morphogenesis;GO:0030501: positive regulation of bone mineralization;GO:0035583: sequestering of TGFbeta in extracellular matrix;GO:0043010: camera-type eye development;GO:0045669: positive regulation of osteoblast differentiation;GO:0048048: embryonic eye morphogenesis;GO:0060346: bone trabecula formation	GO:0001527: microfibril;GO:0001527: microfibril;GO:0005576: extracellular region;GO:0031012: extracellular matrix;GO:0062023: collagen-containing extracellular matrix	GO:0005201: extracellular matrix structural constituent;GO:0005201: extracellular matrix structural constituent;GO:0005509: calcium ion binding;GO:0005515: protein binding;GO:0030023: extracellular matrix constituent conferring elasticity
ENSG00000173267|SNCG	148.83	2.31658	0.466206	4.969	6.72989e-07	7.16367e-05	GO:0007268: chemical synaptic transmission;GO:0008344: adult locomotory behavior;GO:0009306: protein secretion;GO:0014059: regulation of dopamine secretion;GO:0046928: regulation of neurotransmitter secretion;GO:0048488: synaptic vesicle endocytosis;GO:0050808: synapse organization;GO:1901214: regulation of neuron death	GO:0005737: cytoplasm;GO:0005737: cytoplasm;GO:0005813: centrosome;GO:0005819: spindle;GO:0043025: neuronal cell body;GO:0043679: axon terminus;GO:0048471: perinuclear region of cytoplasm;GO:0070062: extracellular exosome	GO:0005515: protein binding;GO:1903136: cuprous ion binding
ENSG00000133321|PLAAT4	153.829	2.31364	0.465655	4.96858	6.74463e-07	7.16367e-05	GO:0006644: phospholipid metabolic process;GO:0008285: negative regulation of cell population proliferation;GO:0016042: lipid catabolic process;GO:0036152: phosphatidylethanolamine acyl-chain remodeling;GO:0045618: positive regulation of keratinocyte differentiation;GO:0070292: N-acylphosphatidylethanolamine metabolic process;GO:0070292: N-acylphosphatidylethanolamine metabolic process;GO:0150074…	GO:0005737: cytoplasm;GO:0005829: cytosol;GO:0016020: membrane;GO:0016021: integral component of membrane	GO:0004623: phospholipase A2 activity;GO:0004623: phospholipase A2 activity;GO:0004623: phospholipase A2 activity;GO:0005515: protein binding;GO:0008970: phospholipase A1 activity;GO:0008970: phospholipase A1 activity;GO:0016410: N-acyltransferase activity;GO:0016410: N-acyltransferase activity;GO:0016746: acyltransferase activity;GO:0052739: phosphatidylserine 1-acylhydrolase activity;GO:0052740…
ENSG00000168140|VASN	2186.66	1.5799	0.318641	4.95823	7.11374e-07	7.50728e-05	GO:0010719: negative regulation of epithelial to mesenchymal transition;GO:0030512: negative regulation of transforming growth factor beta receptor signaling pathway;GO:0030512: negative regulation of transforming growth factor beta receptor signaling pathway;GO:0030512: negative regulation of transforming growth factor beta receptor signaling pathway;GO:0071456: cellular response to hypoxia;GO:0…	GO:0005615: extracellular space;GO:0005615: extracellular space;GO:0005739: mitochondrion;GO:0005765: lysosomal membrane;GO:0005886: plasma membrane;GO:0009986: cell surface;GO:0016021: integral component of membrane;GO:0031012: extracellular matrix;GO:0070062: extracellular exosome;GO:0070062: extracellular exosome	GO:0005515: protein binding;GO:0045296: cadherin binding;GO:0050431: transforming growth factor beta binding;GO:0050431: transforming growth factor beta binding
ENSG00000222328|RNU2-2P	45.1097	4.83738	0.977797	4.94722	7.52797e-07	7.81618e-05
ENSG00000130303|BST2	128.689	2.59012	0.523608	4.94668	7.54889e-07	7.81618e-05	GO:0002737: negative regulation of plasmacytoid dendritic cell cytokine production;GO:0009615: response to virus;GO:0010951: negative regulation of endopeptidase activity;GO:0030308: negative regulation of cell growth;GO:0030336: negative regulation of cell migration;GO:0032956: regulation of actin cytoskeleton organization;GO:0034341: response to interferon-gamma;GO:0035455: response to interfer…	GO:0005737: cytoplasm;GO:0005771: multivesicular body;GO:0005794: Golgi apparatus;GO:0005794: Golgi apparatus;GO:0005829: cytosol;GO:0005886: plasma membrane;GO:0005886: plasma membrane;GO:0009986: cell surface;GO:0009986: cell surface;GO:0009986: cell surface;GO:0016020: membrane;GO:0016021: integral component of membrane;GO:0016324: apical plasma membrane;GO:0031225: anchored component of membr…	GO:0003723: RNA binding;GO:0005515: protein binding;GO:0008191: metalloendopeptidase inhibitor activity;GO:0008191: metalloendopeptidase inhibitor activity;GO:0042802: identical protein binding;GO:0042803: protein homodimerization activity
ENSG00000187837|H1-2	1404.19	1.89472	0.383024	4.94673	7.54709e-07	7.81618e-05	GO:0000122: negative regulation of transcription by RNA polymerase II;GO:0006334: nucleosome assembly;GO:0016584: nucleosome positioning;GO:0030261: chromosome condensation;GO:0045910: negative regulation of DNA recombination;GO:0080182: histone H3-K4 trimethylation;GO:0098532: histone H3-K27 trimethylation	GO:0000786: nucleosome;GO:0000791: euchromatin;GO:0005634: nucleus;GO:0005634: nucleus;GO:0035327: transcriptionally active chromatin	GO:0003690: double-stranded DNA binding;GO:0003723: RNA binding;GO:0005515: protein binding;GO:0031490: chromatin DNA binding;GO:0031492: nucleosomal DNA binding
ENSG00000197903|H2BC12	275.758	2.06876	0.418388	4.94461	7.62972e-07	7.85051e-05	GO:0002227: innate immune response in mucosa;GO:0006334: nucleosome assembly;GO:0019731: antibacterial humoral response;GO:0031640: killing of cells of other organism;GO:0050829: defense response to Gram-negative bacterium;GO:0050830: defense response to Gram-positive bacterium;GO:0061844: antimicrobial humoral immune response mediated by antimicrobial peptide	GO:0000786: nucleosome;GO:0005615: extracellular space;GO:0005634: nucleus;GO:0005634: nucleus;GO:0005654: nucleoplasm;GO:0005654: nucleoplasm;GO:0005829: cytosol	GO:0003674: molecular_function;GO:0003677: DNA binding;GO:0005515: protein binding;GO:0046982: protein heterodimerization activity
ENSG00000196273|LINC00523	97.7236	2.37958	0.483944	4.91706	8.78529e-07	8.98337e-05
ENSG00000117020|AKT3	2834.88	-1.57507	0.320695	-4.91143	9.04141e-07	9.14666e-05	GO:0000002: mitochondrial genome maintenance;GO:0001938: positive regulation of endothelial cell proliferation;GO:0006468: protein phosphorylation;GO:0007165: signal transduction;GO:0018105: peptidyl-serine phosphorylation;GO:0032008: positive regulation of TOR signaling;GO:0035556: intracellular signal transduction;GO:0043536: positive regulation of blood vessel endothelial cell migration;GO:004…	GO:0005634: nucleus;GO:0005737: cytoplasm;GO:0016020: membrane	GO:0004672: protein kinase activity;GO:0004674: protein serine/threonine kinase activity;GO:0004674: protein serine/threonine kinase activity;GO:0004674: protein serine/threonine kinase activity;GO:0005515: protein binding;GO:0005524: ATP binding;GO:0106310: protein serine kinase activity
ENSG00000026559|KCNG1	678.319	-1.65776	0.337553	-4.91111	9.0561e-07	9.14666e-05	GO:0006813: potassium ion transport;GO:0051260: protein homooligomerization;GO:0071805: potassium ion transmembrane transport;GO:0071805: potassium ion transmembrane transport;GO:0071805: potassium ion transmembrane transport;GO:1902259: regulation of delayed rectifier potassium channel activity;GO:1902259: regulation of delayed rectifier potassium channel activity	GO:0005886: plasma membrane;GO:0005886: plasma membrane;GO:0005886: plasma membrane;GO:0008076: voltage-gated potassium channel complex;GO:0016021: integral component of membrane	GO:0005249: voltage-gated potassium channel activity;GO:0005251: delayed rectifier potassium channel activity;GO:0005251: delayed rectifier potassium channel activity;GO:0005251: delayed rectifier potassium channel activity;GO:0005267: potassium channel activity
ENSG00000135426|TESPA1	88.8633	2.34107	0.477134	4.90652	9.27054e-07	9.30616e-05	GO:0010387: COP9 signalosome assembly;GO:0033089: positive regulation of T cell differentiation in thymus;GO:0050862: positive regulation of T cell receptor signaling pathway;GO:0050862: positive regulation of T cell receptor signaling pathway	GO:0005737: cytoplasm;GO:0005737: cytoplasm;GO:0005789: endoplasmic reticulum membrane;GO:0008180: COP9 signalosome	GO:0005102: signaling receptor binding
ENSG00000184588|PDE4B	1510.5	-1.78682	0.365011	-4.89524	9.81867e-07	9.73763e-05	GO:0001780: neutrophil homeostasis;GO:0006198: cAMP catabolic process;GO:0007165: signal transduction;GO:0030593: neutrophil chemotaxis;GO:0032729: positive regulation of interferon-gamma production;GO:0032743: positive regulation of interleukin-2 production;GO:0050852: T cell receptor signaling pathway;GO:0050900: leukocyte migration;GO:0071222: cellular response to lipopolysaccharide;GO:0071466…	GO:0000930: gamma-tubulin complex;GO:0005634: nucleus;GO:0005813: centrosome;GO:0005829: cytosol;GO:0005829: cytosol;GO:0005891: voltage-gated calcium channel complex;GO:0008021: synaptic vesicle;GO:0014069: postsynaptic density;GO:0030018: Z disc;GO:0043197: dendritic spine;GO:0048471: perinuclear region of cytoplasm;GO:0060076: excitatory synapse	GO:0004114: 3',5'-cyclic-nucleotide phosphodiesterase activity;GO:0004115: 3',5'-cyclic-AMP phosphodiesterase activity;GO:0004115: 3',5'-cyclic-AMP phosphodiesterase activity;GO:0004115: 3',5'-cyclic-AMP phosphodiesterase activity;GO:0004115: 3',5'-cyclic-AMP phosphodiesterase activity;GO:0004115: 3',5'-cyclic-AMP phosphodiesterase activity;GO:0030552: cAMP binding;GO:0043015: gamma-tubulin bindi…
ENSG00000128965|CHAC1	158.047	-2.00812	0.410156	-4.89599	9.78124e-07	9.73763e-05	GO:0006750: glutathione biosynthetic process;GO:0006751: glutathione catabolic process;GO:0006986: response to unfolded protein;GO:0007219: Notch signaling pathway;GO:0010955: negative regulation of protein processing;GO:0022008: neurogenesis;GO:0045746: negative regulation of Notch signaling pathway;GO:0070059: intrinsic apoptotic signaling pathway in response to endoplasmic reticulum stress	GO:0005737: cytoplasm;GO:0005802: trans-Golgi network;GO:0005829: cytosol;GO:0005829: cytosol	GO:0003839: gamma-glutamylcyclotransferase activity;GO:0003839: gamma-glutamylcyclotransferase activity;GO:0005112: Notch binding;GO:0005515: protein binding;GO:0061928: glutathione specific gamma-glutamylcyclotransferase activity
ENSG00000215853|RPTN	96.6437	2.48579	0.509934	4.87473	1.08959e-06	0.000107412		GO:0001533: cornified envelope;GO:0001533: cornified envelope;GO:0005576: extracellular region;GO:0005829: cytosol	GO:0005509: calcium ion binding;GO:0046914: transition metal ion binding
ENSG00000213859|KCTD11	3237.25	1.66646	0.343075	4.85742	1.18926e-06	0.000116541	GO:0007049: cell cycle;GO:0016567: protein ubiquitination;GO:0040008: regulation of growth;GO:0045666: positive regulation of neuron differentiation;GO:0051260: protein homooligomerization		GO:0016740: transferase activity;GO:0042802: identical protein binding
ENSG00000124882|EREG	9466.13	-1.43122	0.297133	-4.81677	1.459e-06	0.000142128	GO:0001525: angiogenesis;GO:0001550: ovarian cumulus expansion;GO:0001556: oocyte maturation;GO:0001819: positive regulation of cytokine production;GO:0001819: positive regulation of cytokine production;GO:0007143: female meiotic nuclear division;GO:0007173: epidermal growth factor receptor signaling pathway;GO:0007173: epidermal growth factor receptor signaling pathway;GO:0007267: cell-cell sign…	GO:0005576: extracellular region;GO:0005615: extracellular space;GO:0005615: extracellular space;GO:0005887: integral component of plasma membrane;GO:0030669: clathrin-coated endocytic vesicle membrane	GO:0005154: epidermal growth factor receptor binding;GO:0005154: epidermal growth factor receptor binding;GO:0005154: epidermal growth factor receptor binding;GO:0005515: protein binding;GO:0008083: growth factor activity
ENSG00000126561|STAT5A	122.9	2.74415	0.570359	4.81127	1.49977e-06	0.00014524	GO:0001938: positive regulation of endothelial cell proliferation;GO:0006357: regulation of transcription by RNA polymerase II;GO:0006952: defense response;GO:0007259: receptor signaling pathway via JAK-STAT;GO:0007595: lactation;GO:0019221: cytokine-mediated signaling pathway;GO:0019530: taurine metabolic process;GO:0038026: reelin-mediated signaling pathway;GO:0040014: regulation of multicellul…	GO:0000785: chromatin;GO:0005654: nucleoplasm;GO:0005654: nucleoplasm;GO:0005829: cytosol;GO:0005829: cytosol	GO:0000978: RNA polymerase II cis-regulatory region sequence-specific DNA binding;GO:0000981: DNA-binding transcription factor activity, RNA polymerase II-specific;GO:0000981: DNA-binding transcription factor activity, RNA polymerase II-specific;GO:0003700: DNA-binding transcription factor activity;GO:0005515: protein binding
ENSG00000198431|TXNRD1	24713.3	-1.65548	0.345205	-4.79564	1.62156e-06	0.000153696	GO:0001707: mesoderm formation;GO:0007165: signal transduction;GO:0008283: cell population proliferation;GO:0045454: cell redox homeostasis;GO:0098869: cellular oxidant detoxification	GO:0001650: fibrillar center;GO:0005654: nucleoplasm;GO:0005737: cytoplasm;GO:0005739: mitochondrion;GO:0005829: cytosol;GO:0070062: extracellular exosome	GO:0004791: thioredoxin-disulfide reductase activity;GO:0005515: protein binding;GO:0050660: flavin adenine dinucleotide binding;GO:0097573: glutathione oxidoreductase activity
ENSG00000078098|FAP	787.779	1.55759	0.324818	4.79529	1.62444e-06	0.000153696	GO:0001525: angiogenesis;GO:0006508: proteolysis;GO:0006508: proteolysis;GO:0006508: proteolysis;GO:0007155: cell adhesion;GO:0010710: regulation of collagen catabolic process;GO:0010716: negative regulation of extracellular matrix disassembly;GO:0043542: endothelial cell migration;GO:0051603: proteolysis involved in cellular protein catabolic process;GO:0051726: regulation of cell cycle;GO:00519…	GO:0005615: extracellular space;GO:0005737: cytoplasm;GO:0005886: plasma membrane;GO:0005886: plasma membrane;GO:0005886: plasma membrane;GO:0005925: focal adhesion;GO:0009986: cell surface;GO:0016021: integral component of membrane;GO:0030027: lamellipodium;GO:0031258: lamellipodium membrane;GO:0032587: ruffle membrane;GO:0045177: apical part of cell;GO:0045178: basal part of cell;GO:1905368: pe…	GO:0002020: protease binding;GO:0004175: endopeptidase activity;GO:0004252: serine-type endopeptidase activity;GO:0005178: integrin binding;GO:0005515: protein binding;GO:0008233: peptidase activity;GO:0008236: serine-type peptidase activity;GO:0008236: serine-type peptidase activity;GO:0008236: serine-type peptidase activity;GO:0008239: dipeptidyl-peptidase activity;GO:0008239: dipeptidyl-peptid…
ENSG00000124225|PMEPA1	896.706	-1.46102	0.304608	-4.79639	1.61552e-06	0.000153696	GO:0010991: negative regulation of SMAD protein complex assembly;GO:0010991: negative regulation of SMAD protein complex assembly;GO:0030512: negative regulation of transforming growth factor beta receptor signaling pathway;GO:0030512: negative regulation of transforming growth factor beta receptor signaling pathway;GO:0030512: negative regulation of transforming growth factor beta receptor signa…	GO:0000139: Golgi membrane;GO:0000139: Golgi membrane;GO:0005886: plasma membrane;GO:0010008: endosome membrane;GO:0016021: integral component of membrane;GO:0031901: early endosome membrane;GO:0031901: early endosome membrane;GO:0031901: early endosome membrane;GO:0043231: intracellular membrane-bounded organelle	GO:0005515: protein binding;GO:0050699: WW domain binding;GO:0070412: R-SMAD binding;GO:0070412: R-SMAD binding
ENSG00000107249|GLIS3	843.037	-1.43474	0.299058	-4.79752	1.6064e-06	0.000153696	GO:0000122: negative regulation of transcription by RNA polymerase II;GO:0006357: regulation of transcription by RNA polymerase II;GO:0006366: transcription by RNA polymerase II;GO:0045944: positive regulation of transcription by RNA polymerase II	GO:0005634: nucleus;GO:0005634: nucleus	GO:0000978: RNA polymerase II cis-regulatory region sequence-specific DNA binding;GO:0000978: RNA polymerase II cis-regulatory region sequence-specific DNA binding;GO:0000981: DNA-binding transcription factor activity, RNA polymerase II-specific;GO:0001227: DNA-binding transcription repressor activity, RNA polymerase II-specific;GO:0001228: DNA-binding transcription activator activity, RNA polyme…
ENSG00000213648|SULT1A4	51.9073	3.02698	0.63265	4.78461	1.71323e-06	0.00016117	GO:0006068: ethanol catabolic process;GO:0006584: catecholamine metabolic process;GO:0006805: xenobiotic metabolic process;GO:0007212: dopamine receptor signaling pathway;GO:0008202: steroid metabolic process;GO:0009812: flavonoid metabolic process;GO:0042420: dopamine catabolic process;GO:0050427: 3'-phosphoadenosine 5'-phosphosulfate metabolic process;GO:0051923: sulfation;GO:0051923: sulfation…	GO:0005737: cytoplasm;GO:0005829: cytosol	GO:0004062: aryl sulfotransferase activity;GO:0004062: aryl sulfotransferase activity;GO:0005515: protein binding;GO:0008146: sulfotransferase activity;GO:0008146: sulfotransferase activity;GO:0043199: sulfate binding;GO:0047685: amine sulfotransferase activity
ENSG00000155265|GOLGA7B	1042.86	1.40654	0.294221	4.78057	1.74798e-06	0.000163506	GO:0006612: protein targeting to membrane;GO:0018230: peptidyl-L-cysteine S-palmitoylation	GO:0000139: Golgi membrane;GO:0002178: palmitoyltransferase complex	GO:0005515: protein binding;GO:0019899: enzyme binding
ENSG00000047457|CP	66.0812	2.55247	0.53456	4.77489	1.79803e-06	0.000167237	GO:0006825: copper ion transport;GO:0006826: iron ion transport;GO:0006879: cellular iron ion homeostasis;GO:0055072: iron ion homeostasis	GO:0005576: extracellular region;GO:0005576: extracellular region;GO:0005615: extracellular space;GO:0005615: extracellular space;GO:0005765: lysosomal membrane;GO:0005788: endoplasmic reticulum lumen;GO:0005886: plasma membrane;GO:0070062: extracellular exosome;GO:0072562: blood microparticle	GO:0004322: ferroxidase activity;GO:0005507: copper ion binding;GO:0016491: oxidoreductase activity;GO:0051087: chaperone binding
ENSG00000164898|FMC1	449.739	1.53539	0.322554	4.76008	1.93513e-06	0.000178978	GO:0033615: mitochondrial proton-transporting ATP synthase complex assembly;GO:0050995: negative regulation of lipid catabolic process;GO:0061469: regulation of type B pancreatic cell proliferation	GO:0005739: mitochondrion;GO:0005739: mitochondrion	GO:0005515: protein binding
ENSG00000184500|PROS1	1401.92	1.4342	0.302269	4.74479	2.08724e-06	0.000191968	GO:0007596: blood coagulation;GO:0010951: negative regulation of endopeptidase activity;GO:0042730: fibrinolysis	GO:0000139: Golgi membrane;GO:0005576: extracellular region;GO:0005576: extracellular region;GO:0005615: extracellular space;GO:0005615: extracellular space;GO:0005789: endoplasmic reticulum membrane;GO:0005796: Golgi lumen;GO:0005886: plasma membrane;GO:0031093: platelet alpha granule lumen;GO:0070062: extracellular exosome;GO:0072562: blood microparticle	GO:0004866: endopeptidase inhibitor activity;GO:0005509: calcium ion binding;GO:0005515: protein binding
ENSG00000071242|RPS6KA2	272.939	-2.342	0.493904	-4.74181	2.11813e-06	0.000193727	GO:0001556: oocyte maturation;GO:0002035: brain renin-angiotensin system;GO:0007165: signal transduction;GO:0007268: chemical synaptic transmission;GO:0007507: heart development;GO:0008285: negative regulation of cell population proliferation;GO:0010628: positive regulation of gene expression;GO:0010659: cardiac muscle cell apoptotic process;GO:0018105: peptidyl-serine phosphorylation;GO:0035556:…	GO:0005634: nucleus;GO:0005654: nucleoplasm;GO:0005654: nucleoplasm;GO:0005654: nucleoplasm;GO:0005737: cytoplasm;GO:0005737: cytoplasm;GO:0005829: cytosol;GO:0045202: synapse;GO:0072687: meiotic spindle	GO:0000287: magnesium ion binding;GO:0004674: protein serine/threonine kinase activity;GO:0004674: protein serine/threonine kinase activity;GO:0004674: protein serine/threonine kinase activity;GO:0004711: ribosomal protein S6 kinase activity;GO:0004712: protein serine/threonine/tyrosine kinase activity;GO:0005515: protein binding;GO:0005524: ATP binding;GO:0106310: protein serine kinase activity
ENSG00000203780|FANK1	692.578	1.65734	0.350091	4.73403	2.20109e-06	0.000200202	GO:0042981: regulation of apoptotic process;GO:0043065: positive regulation of apoptotic process;GO:0043066: negative regulation of apoptotic process;GO:0045893: positive regulation of transcription, DNA-templated;GO:0051091: positive regulation of DNA-binding transcription factor activity;GO:0051091: positive regulation of DNA-binding transcription factor activity	GO:0000785: chromatin;GO:0005634: nucleus;GO:0005634: nucleus;GO:0005654: nucleoplasm;GO:0005737: cytoplasm;GO:0005829: cytosol;GO:0005929: cilium;GO:0036064: ciliary basal body;GO:0097546: ciliary base	GO:0005515: protein binding
ENSG00000105509|HAS1	1187.51	-1.39847	0.295662	-4.72998	2.24542e-06	0.000202866	GO:0006024: glycosaminoglycan biosynthetic process;GO:0007155: cell adhesion;GO:0010764: negative regulation of fibroblast migration;GO:0030213: hyaluronan biosynthetic process;GO:0030213: hyaluronan biosynthetic process;GO:0030213: hyaluronan biosynthetic process;GO:0036120: cellular response to platelet-derived growth factor stimulus;GO:0045226: extracellular polysaccharide biosynthetic process…	GO:0005886: plasma membrane;GO:0005887: integral component of plasma membrane	GO:0005515: protein binding;GO:0042802: identical protein binding;GO:0050501: hyaluronan synthase activity;GO:0050501: hyaluronan synthase activity;GO:0050501: hyaluronan synthase activity
ENSG00000287149|AC092640.1	128.557	2.01016	0.425061	4.72911	2.25502e-06	0.000202866
ENSG00000188015|S100A3	640.892	1.80387	0.381913	4.72325	2.321e-06	0.000207666		GO:0005794: Golgi apparatus;GO:0005829: cytosol;GO:0005886: plasma membrane	GO:0005509: calcium ion binding;GO:0005515: protein binding;GO:0008270: zinc ion binding;GO:0048306: calcium-dependent protein binding
ENSG00000109511|ANXA10	432.064	-1.70204	0.361126	-4.71315	2.43917e-06	0.00021706		GO:0005737: cytoplasm	GO:0005509: calcium ion binding;GO:0005515: protein binding;GO:0005544: calcium-dependent phospholipid binding
ENSG00000156886|ITGAD	79.8304	2.75918	0.586818	4.70194	2.577e-06	0.000228092	GO:0006955: immune response;GO:0007229: integrin-mediated signaling pathway;GO:0034113: heterotypic cell-cell adhesion	GO:0005886: plasma membrane;GO:0008305: integrin complex;GO:0009986: cell surface	GO:0046872: metal ion binding
ENSG00000104936|DMPK	2059.48	1.35725	0.289601	4.68663	2.7774e-06	0.000244515	GO:0006468: protein phosphorylation;GO:0006874: cellular calcium ion homeostasis;GO:0006874: cellular calcium ion homeostasis;GO:0006998: nuclear envelope organization;GO:0006998: nuclear envelope organization;GO:0008016: regulation of heart contraction;GO:0008016: regulation of heart contraction;GO:0010657: muscle cell apoptotic process;GO:0010830: regulation of myotube differentiation;GO:001472…	GO:0005640: nuclear outer membrane;GO:0005789: endoplasmic reticulum membrane;GO:0005829: cytosol;GO:0005886: plasma membrane;GO:0031307: integral component of mitochondrial outer membrane;GO:0031965: nuclear membrane;GO:0033017: sarcoplasmic reticulum membrane;GO:0033017: sarcoplasmic reticulum membrane	GO:0004674: protein serine/threonine kinase activity;GO:0004674: protein serine/threonine kinase activity;GO:0004674: protein serine/threonine kinase activity;GO:0005515: protein binding;GO:0005524: ATP binding;GO:0017020: myosin phosphatase regulator activity;GO:0046872: metal ion binding;GO:0106310: protein serine kinase activity
ENSG00000237950|AL357079.1	421.502	1.60944	0.344527	4.67145	2.99077e-06	0.000260826
ENSG00000267073|AC005256.1	113.915	2.32226	0.497143	4.67121	2.99436e-06	0.000260826
ENSG00000129910|CDH15	28.1355	3.91595	0.838586	4.66971	3.01628e-06	0.000261353	GO:0007155: cell adhesion;GO:0007156: homophilic cell adhesion via plasma membrane adhesion molecules;GO:0098742: cell-cell adhesion via plasma-membrane adhesion molecules	GO:0005794: Golgi apparatus;GO:0005886: plasma membrane;GO:0005886: plasma membrane;GO:0005901: caveola;GO:0016021: integral component of membrane;GO:0016342: catenin complex;GO:0031594: neuromuscular junction;GO:0070062: extracellular exosome	GO:0005509: calcium ion binding;GO:0005515: protein binding;GO:0045296: cadherin binding
ENSG00000187642|PERM1	27.3876	4.08101	0.875103	4.66346	3.10938e-06	0.000268009	GO:0006355: regulation of transcription, DNA-templated;GO:0006355: regulation of transcription, DNA-templated;GO:0014850: response to muscle activity;GO:0014850: response to muscle activity	GO:0005634: nucleus;GO:0005634: nucleus;GO:0005737: cytoplasm;GO:0005737: cytoplasm
ENSG00000145335|SNCA	1253.1	1.38269	0.29665	4.66102	3.14651e-06	0.000269796	GO:0000122: negative regulation of transcription by RNA polymerase II;GO:0001774: microglial cell activation;GO:0001921: positive regulation of receptor recycling;GO:0001956: positive regulation of neurotransmitter secretion;GO:0006469: negative regulation of protein kinase activity;GO:0006631: fatty acid metabolic process;GO:0006638: neutral lipid metabolic process;GO:0006644: phospholipid metab…	GO:0005576: extracellular region;GO:0005576: extracellular region;GO:0005615: extracellular space;GO:0005634: nucleus;GO:0005640: nuclear outer membrane;GO:0005737: cytoplasm;GO:0005737: cytoplasm;GO:0005739: mitochondrion;GO:0005741: mitochondrial outer membrane;GO:0005743: mitochondrial inner membrane;GO:0005758: mitochondrial intermembrane space;GO:0005759: mitochondrial matrix;GO:0005764: lys…	GO:0000149: SNARE binding;GO:0000287: magnesium ion binding;GO:0000976: transcription cis-regulatory region binding;GO:0003779: actin binding;GO:0004860: protein kinase inhibitor activity;GO:0005504: fatty acid binding;GO:0005507: copper ion binding;GO:0005509: calcium ion binding;GO:0005515: protein binding;GO:0005543: phospholipid binding;GO:0008017: microtubule binding;GO:0008198: ferrous iron…
ENSG00000243137|PSG4	100.749	2.18647	0.469698	4.65506	3.23882e-06	0.000276273	GO:0007565: female pregnancy	GO:0005576: extracellular region
ENSG00000286214|AUXG01000058.1	317.239	2.22915	0.482745	4.61765	3.88114e-06	0.000329357
ENSG00000101335|MYL9	7747.5	1.2724	0.27581	4.6133	3.96322e-06	0.000334597	GO:0006937: regulation of muscle contraction;GO:0070527: platelet aggregation	GO:0001725: stress fiber;GO:0005829: cytosol;GO:0005859: muscle myosin complex;GO:0005938: cell cortex;GO:0030018: Z disc	GO:0005509: calcium ion binding;GO:0008307: structural constituent of muscle;GO:0032036: myosin heavy chain binding
ENSG00000206585|RNVU1-7	66.4505	3.08873	0.671125	4.60232	4.17812e-06	0.000350941	GO:0000395: mRNA 5'-splice site recognition	GO:0005685: U1 snRNP	GO:0030627: pre-mRNA 5'-splice site binding
ENSG00000175130|MARCKSL1	1998.68	-1.30157	0.283763	-4.58681	4.50078e-06	0.000376123	GO:0007015: actin filament organization;GO:0007417: central nervous system development;GO:0008284: positive regulation of cell population proliferation	GO:0005737: cytoplasm;GO:0005856: cytoskeleton;GO:0005886: plasma membrane;GO:0005886: plasma membrane;GO:0070062: extracellular exosome	GO:0005515: protein binding;GO:0005516: calmodulin binding;GO:0051015: actin filament binding
ENSG00000170454|KRT75	659.282	-1.58997	0.347213	-4.57924	4.66675e-06	0.000388024	GO:0002244: hematopoietic progenitor cell differentiation	GO:0005829: cytosol;GO:0005882: intermediate filament;GO:0045095: keratin filament;GO:0070062: extracellular exosome	GO:0005198: structural molecule activity;GO:0005515: protein binding
ENSG00000173947|PIFO	111.639	2.7018	0.590569	4.57491	4.76421e-06	0.000394136	GO:0031344: regulation of cell projection organization;GO:0031344: regulation of cell projection organization;GO:0033674: positive regulation of kinase activity;GO:0044782: cilium organization;GO:0060971: embryonic heart tube left/right pattern formation	GO:0005634: nucleus;GO:0005802: trans-Golgi network;GO:0031410: cytoplasmic vesicle;GO:0036064: ciliary basal body;GO:0036064: ciliary basal body	GO:0005515: protein binding;GO:0008092: cytoskeletal protein binding;GO:0019894: kinesin binding;GO:0019901: protein kinase binding;GO:0031267: small GTPase binding;GO:0043015: gamma-tubulin binding;GO:0048487: beta-tubulin binding
ENSG00000226777|FAM30A	39.8723	-3.22352	0.705489	-4.56919	4.89603e-06	0.000403017
ENSG00000003137|CYP26B1	400.96	-1.51201	0.331335	-4.56339	5.03334e-06	0.000412258	GO:0001709: cell fate determination;GO:0001768: establishment of T cell polarity;GO:0001822: kidney development;GO:0006766: vitamin metabolic process;GO:0006805: xenobiotic metabolic process;GO:0006954: inflammatory response;GO:0007140: male meiotic nuclear division;GO:0007283: spermatogenesis;GO:0009954: proximal/distal pattern formation;GO:0010628: positive regulation of gene expression;GO:0016…	GO:0005737: cytoplasm;GO:0005789: endoplasmic reticulum membrane	GO:0001972: retinoic acid binding;GO:0004497: monooxygenase activity;GO:0005506: iron ion binding;GO:0005515: protein binding;GO:0008401: retinoic acid 4-hydroxylase activity;GO:0008401: retinoic acid 4-hydroxylase activity;GO:0016491: oxidoreductase activity;GO:0016709: oxidoreductase activity, acting on paired donors, with incorporation or reduction of molecular oxygen, NAD(P)H as one donor, an…
ENSG00000243742|RPLP0P2	957.736	-1.407	0.308457	-4.56141	5.08121e-06	0.000414119
ENSG00000050165|DKK3	529.467	-1.50481	0.330388	-4.55466	5.24692e-06	0.000425518	GO:0009653: anatomical structure morphogenesis;GO:0016055: Wnt signaling pathway;GO:0017015: regulation of transforming growth factor beta receptor signaling pathway;GO:0030325: adrenal gland development;GO:0032348: negative regulation of aldosterone biosynthetic process;GO:0045892: negative regulation of transcription, DNA-templated;GO:0090090: negative regulation of canonical Wnt signaling path…	GO:0005615: extracellular space	GO:0005515: protein binding;GO:0039706: co-receptor binding;GO:0048019: receptor antagonist activity
ENSG00000273768|RNVU1-29	69.7534	3.49845	0.7706	4.5399	5.62817e-06	0.000454199
ENSG00000207389|RNU1-4	92.208	3.51603	0.777139	4.52433	6.05876e-06	0.000486563	GO:0000395: mRNA 5'-splice site recognition	GO:0005685: U1 snRNP	GO:0030627: pre-mRNA 5'-splice site binding
ENSG00000133048|CHI3L1	1639.64	1.40064	0.31194	4.49009	7.11926e-06	0.000563482	GO:0005975: carbohydrate metabolic process;GO:0006032: chitin catabolic process;GO:0006915: apoptotic process;GO:0006954: inflammatory response;GO:0007250: activation of NF-kappaB-inducing kinase activity;GO:0009612: response to mechanical stimulus;GO:0010800: positive regulation of peptidyl-threonine phosphorylation;GO:0030324: lung development;GO:0032757: positive regulation of interleukin-8 pr…	GO:0005576: extracellular region;GO:0005576: extracellular region;GO:0005615: extracellular space;GO:0005615: extracellular space;GO:0005737: cytoplasm;GO:0005783: endoplasmic reticulum;GO:0031012: extracellular matrix;GO:0035580: specific granule lumen;GO:0048471: perinuclear region of cytoplasm;GO:0070062: extracellular exosome	GO:0004568: chitinase activity;GO:0004568: chitinase activity;GO:0005201: extracellular matrix structural constituent;GO:0005515: protein binding;GO:0008061: chitin binding;GO:0008061: chitin binding;GO:0030246: carbohydrate binding
ENSG00000074416|MGLL	4475.8	-1.44593	0.321965	-4.49096	7.09044e-06	0.000563482	GO:0006629: lipid metabolic process;GO:0006633: fatty acid biosynthetic process;GO:0006954: inflammatory response;GO:0009966: regulation of signal transduction;GO:0019369: arachidonic acid metabolic process;GO:0019369: arachidonic acid metabolic process;GO:0019433: triglyceride catabolic process;GO:0046464: acylglycerol catabolic process;GO:0046464: acylglycerol catabolic process;GO:0050727: regu…	GO:0005654: nucleoplasm;GO:0005789: endoplasmic reticulum membrane;GO:0005829: cytosol;GO:0005886: plasma membrane;GO:0016020: membrane;GO:0019898: extrinsic component of membrane	GO:0004622: lysophospholipase activity;GO:0005515: protein binding;GO:0016298: lipase activity;GO:0042803: protein homodimerization activity;GO:0047372: acylglycerol lipase activity;GO:0047372: acylglycerol lipase activity;GO:0047372: acylglycerol lipase activity;GO:0047372: acylglycerol lipase activity
ENSG00000255182|AC084125.2	311.457	1.867	0.415623	4.49204	7.05426e-06	0.000563482
ENSG00000164188|RANBP3L	61.0144	2.49968	0.557553	4.4833	7.34966e-06	0.000578935	GO:0006611: protein export from nucleus;GO:0045663: positive regulation of myoblast differentiation;GO:0045668: negative regulation of osteoblast differentiation;GO:0050790: regulation of catalytic activity;GO:1901706: mesenchymal cell differentiation involved in bone development	GO:0005643: nuclear pore;GO:0005737: cytoplasm	GO:0005096: GTPase activator activity;GO:0005515: protein binding;GO:0046332: SMAD binding
ENSG00000151117|TMEM86A	375.292	-1.49705	0.334191	-4.47962	7.47766e-06	0.000586213		GO:0016021: integral component of membrane	GO:0005515: protein binding;GO:0047408: alkenylglycerophosphocholine hydrolase activity;GO:0047409: alkenylglycerophosphoethanolamine hydrolase activity
ENSG00000207005|RNU1-2	109.022	3.52412	0.787307	4.47617	7.59924e-06	0.000592921
ENSG00000162772|ATF3	1442.22	-1.45883	0.325995	-4.47501	7.64068e-06	0.000593342	GO:0000122: negative regulation of transcription by RNA polymerase II;GO:0006094: gluconeogenesis;GO:0006357: regulation of transcription by RNA polymerase II;GO:0008284: positive regulation of cell population proliferation;GO:0010628: positive regulation of gene expression;GO:0030968: endoplasmic reticulum unfolded protein response;GO:0034198: cellular response to amino acid starvation;GO:003591…	GO:0000785: chromatin;GO:0005634: nucleus;GO:0005634: nucleus;GO:0005654: nucleoplasm;GO:0005654: nucleoplasm;GO:0005730: nucleolus;GO:1990622: CHOP-ATF3 complex	GO:0000976: transcription cis-regulatory region binding;GO:0000977: RNA polymerase II transcription regulatory region sequence-specific DNA binding;GO:0000977: RNA polymerase II transcription regulatory region sequence-specific DNA binding;GO:0000978: RNA polymerase II cis-regulatory region sequence-specific DNA binding;GO:0000981: DNA-binding transcription factor activity, RNA polymerase II-spec…
ENSG00000065054|SLC9A3R2	1932.52	1.45031	0.324334	4.47167	7.76118e-06	0.00059987	GO:0065003: protein-containing complex assembly;GO:0072659: protein localization to plasma membrane	GO:0005634: nucleus;GO:0005886: plasma membrane;GO:0005925: focal adhesion;GO:0012505: endomembrane system;GO:0016324: apical plasma membrane;GO:0070062: extracellular exosome	GO:0005102: signaling receptor binding;GO:0005102: signaling receptor binding;GO:0005515: protein binding;GO:0008013: beta-catenin binding;GO:0008022: protein C-terminus binding;GO:0019902: phosphatase binding;GO:0031799: type 2 metabotropic glutamate receptor binding;GO:0031800: type 3 metabotropic glutamate receptor binding;GO:0042802: identical protein binding;GO:0043495: protein-membrane adap…
ENSG00000197165|SULT1A2	24.3762	5.77894	1.29295	4.46958	7.83748e-06	0.000600133	GO:0006068: ethanol catabolic process;GO:0006584: catecholamine metabolic process;GO:0006805: xenobiotic metabolic process;GO:0008202: steroid metabolic process;GO:0009309: amine biosynthetic process;GO:0018958: phenol-containing compound metabolic process;GO:0050427: 3'-phosphoadenosine 5'-phosphosulfate metabolic process;GO:0051923: sulfation;GO:0051923: sulfation	GO:0005737: cytoplasm;GO:0005829: cytosol	GO:0004062: aryl sulfotransferase activity;GO:0004062: aryl sulfotransferase activity;GO:0005515: protein binding;GO:0008146: sulfotransferase activity;GO:0047894: flavonol 3-sulfotransferase activity
ENSG00000136244|IL6	800.311	-1.35154	0.302374	-4.46976	7.83067e-06	0.000600133	GO:0001781: neutrophil apoptotic process;GO:0002314: germinal center B cell differentiation;GO:0002384: hepatic immune response;GO:0002384: hepatic immune response;GO:0002446: neutrophil mediated immunity;GO:0002548: monocyte chemotaxis;GO:0002639: positive regulation of immunoglobulin production;GO:0002639: positive regulation of immunoglobulin production;GO:0002675: positive regulation of acute…	GO:0005576: extracellular region;GO:0005615: extracellular space;GO:0005615: extracellular space;GO:0005788: endoplasmic reticulum lumen;GO:0005896: interleukin-6 receptor complex;GO:0005896: interleukin-6 receptor complex	GO:0005125: cytokine activity;GO:0005125: cytokine activity;GO:0005125: cytokine activity;GO:0005125: cytokine activity;GO:0005125: cytokine activity;GO:0005138: interleukin-6 receptor binding;GO:0005138: interleukin-6 receptor binding;GO:0005138: interleukin-6 receptor binding;GO:0005515: protein binding;GO:0008083: growth factor activity;GO:0008083: growth factor activity
ENSG00000139567|ACVRL1	36.0958	3.12246	0.699212	4.46569	7.98115e-06	0.000608304	GO:0001525: angiogenesis;GO:0001525: angiogenesis;GO:0001666: response to hypoxia;GO:0001701: in utero embryonic development;GO:0001936: regulation of endothelial cell proliferation;GO:0001937: negative regulation of endothelial cell proliferation;GO:0001938: positive regulation of endothelial cell proliferation;GO:0001946: lymphangiogenesis;GO:0001955: blood vessel maturation;GO:0001974: blood v…	GO:0005886: plasma membrane;GO:0005886: plasma membrane;GO:0005886: plasma membrane;GO:0005887: integral component of plasma membrane;GO:0009986: cell surface;GO:0030425: dendrite;GO:0043025: neuronal cell body;GO:0043235: receptor complex;GO:0070724: BMP receptor complex	GO:0004674: protein serine/threonine kinase activity;GO:0004674: protein serine/threonine kinase activity;GO:0004675: transmembrane receptor protein serine/threonine kinase activity;GO:0005024: transforming growth factor beta-activated receptor activity;GO:0005025: transforming growth factor beta receptor activity, type I;GO:0005025: transforming growth factor beta receptor activity, type I;GO:00…
ENSG00000124102|PI3	419.434	-1.50575	0.33753	-4.4611	8.15413e-06	0.000618624	GO:0007620: copulation;GO:0010951: negative regulation of endopeptidase activity;GO:0018149: peptide cross-linking;GO:0019731: antibacterial humoral response;GO:0045087: innate immune response	GO:0001533: cornified envelope;GO:0001533: cornified envelope;GO:0005576: extracellular region;GO:0005615: extracellular space;GO:0005829: cytosol;GO:0031012: extracellular matrix	GO:0004866: endopeptidase inhibitor activity;GO:0004867: serine-type endopeptidase inhibitor activity;GO:0030280: structural constituent of skin epidermis
ENSG00000138678|GPAT3	6501.93	-1.27974	0.287919	-4.44481	8.7968e-06	0.00066432	GO:0006072: glycerol-3-phosphate metabolic process;GO:0006654: phosphatidic acid biosynthetic process;GO:0016024: CDP-diacylglycerol biosynthetic process;GO:0019432: triglyceride biosynthetic process;GO:0019432: triglyceride biosynthetic process;GO:0032006: regulation of TOR signaling	GO:0005783: endoplasmic reticulum;GO:0005789: endoplasmic reticulum membrane;GO:0005789: endoplasmic reticulum membrane;GO:0016021: integral component of membrane	GO:0003841: 1-acylglycerol-3-phosphate O-acyltransferase activity;GO:0003841: 1-acylglycerol-3-phosphate O-acyltransferase activity;GO:0004366: glycerol-3-phosphate O-acyltransferase activity;GO:0004366: glycerol-3-phosphate O-acyltransferase activity;GO:0102420: sn-1-glycerol-3-phosphate C16:0-DCA-CoA acyl transferase activity
ENSG00000249669|CARMN	96.5966	2.13433	0.481099	4.43637	9.14886e-06	0.000687752
ENSG00000205403|CFI	1311.35	1.46865	0.331265	4.43346	9.27338e-06	0.000693944	GO:0006508: proteolysis;GO:0006897: endocytosis;GO:0006958: complement activation, classical pathway;GO:0045087: innate immune response	GO:0005576: extracellular region;GO:0005615: extracellular space;GO:0016020: membrane;GO:0070062: extracellular exosome	GO:0004252: serine-type endopeptidase activity;GO:0005044: scavenger receptor activity;GO:0005515: protein binding;GO:0046872: metal ion binding
ENSG00000143847|PPFIA4	4423.36	1.32832	0.300107	4.42616	9.59236e-06	0.000714565	GO:0050808: synapse organization	GO:0005829: cytosol;GO:0009986: cell surface;GO:0045202: synapse;GO:0048786: presynaptic active zone;GO:0048786: presynaptic active zone	GO:0005515: protein binding
ENSG00000108622|ICAM2	161.428	1.7755	0.401357	4.42374	9.70047e-06	0.000719364	GO:0007155: cell adhesion;GO:0098609: cell-cell adhesion	GO:0001931: uropod;GO:0005886: plasma membrane;GO:0005887: integral component of plasma membrane;GO:0005902: microvillus;GO:0016020: membrane;GO:0032154: cleavage furrow	GO:0005178: integrin binding;GO:0005178: integrin binding
ENSG00000158966|CACHD1	285.718	-1.68906	0.38256	-4.41516	1.00936e-05	0.000745161	GO:0070588: calcium ion transmembrane transport	GO:0005891: voltage-gated calcium channel complex	GO:0005245: voltage-gated calcium channel activity
ENSG00000116741|RGS2	554.229	1.56802	0.355536	4.4103	1.03228e-05	0.000758679	GO:0001975: response to amphetamine;GO:0007049: cell cycle;GO:0007186: G protein-coupled receptor signaling pathway;GO:0007283: spermatogenesis;GO:0007420: brain development;GO:0008277: regulation of G protein-coupled receptor signaling pathway;GO:0010519: negative regulation of phospholipase activity;GO:0010614: negative regulation of cardiac muscle hypertrophy;GO:0010976: positive regulation of…	GO:0005634: nucleus;GO:0005730: nucleolus;GO:0005737: cytoplasm;GO:0005739: mitochondrion;GO:0005829: cytosol;GO:0005829: cytosol;GO:0005886: plasma membrane;GO:0005886: plasma membrane;GO:0009898: cytoplasmic side of plasma membrane;GO:0043005: neuron projection	GO:0001965: G-protein alpha-subunit binding;GO:0003924: GTPase activity;GO:0005096: GTPase activator activity;GO:0005515: protein binding;GO:0005516: calmodulin binding;GO:0048487: beta-tubulin binding
ENSG00000130513|GDF15	365.586	-1.71889	0.390363	-4.40332	1.06608e-05	0.000780041	GO:0002023: reduction of food intake in response to dietary excess;GO:0007165: signal transduction;GO:0007179: transforming growth factor beta receptor signaling pathway;GO:0007267: cell-cell signaling;GO:0010862: positive regulation of pathway-restricted SMAD protein phosphorylation;GO:0030509: BMP signaling pathway;GO:0035860: glial cell-derived neurotrophic factor receptor signaling pathway;GO…	GO:0005576: extracellular region;GO:0005615: extracellular space;GO:0005615: extracellular space;GO:0005634: nucleus;GO:0005737: cytoplasm;GO:0005794: Golgi apparatus;GO:0062023: collagen-containing extracellular matrix;GO:0070062: extracellular exosome	GO:0005125: cytokine activity;GO:0005515: protein binding;GO:0008083: growth factor activity;GO:0042803: protein homodimerization activity;GO:0070700: BMP receptor binding
ENSG00000019505|SYT13	395.586	1.71737	0.390785	4.39468	1.10935e-05	0.000808108	GO:0006906: vesicle fusion;GO:0014059: regulation of dopamine secretion;GO:0016192: vesicle-mediated transport;GO:0017156: calcium-ion regulated exocytosis;GO:0017158: regulation of calcium ion-dependent exocytosis;GO:0071277: cellular response to calcium ion	GO:0005886: plasma membrane;GO:0005887: integral component of plasma membrane;GO:0030133: transport vesicle;GO:0030424: axon;GO:0043231: intracellular membrane-bounded organelle;GO:0045202: synapse;GO:0070382: exocytic vesicle	GO:0000149: SNARE binding;GO:0001786: phosphatidylserine binding;GO:0005509: calcium ion binding;GO:0005544: calcium-dependent phospholipid binding;GO:0030276: clathrin binding
ENSG00000105519|CAPS	149.357	1.75815	0.40082	4.38638	1.15252e-05	0.000835853	GO:0035556: intracellular signal transduction	GO:0005737: cytoplasm;GO:0031982: vesicle	GO:0005509: calcium ion binding
ENSG00000139364|TMEM132B	84.2116	-2.11334	0.482324	-4.38159	1.17818e-05	0.000850716	GO:0008150: biological_process	GO:0005575: cellular_component;GO:0016021: integral component of membrane	GO:0003674: molecular_function
ENSG00000207513|RNU1-3	68.9872	3.42166	0.78138	4.379	1.19225e-05	0.000857118
ENSG00000170085|SIMC1	198.629	-2.01261	0.460704	-4.36855	1.25073e-05	0.000895254	GO:0010466: negative regulation of peptidase activity	GO:0005737: cytoplasm;GO:0030017: sarcomere	GO:0005515: protein binding;GO:0030414: peptidase inhibitor activity;GO:0032184: SUMO polymer binding;GO:0032184: SUMO polymer binding
ENSG00000203709|MIR29B2CHG	133.483	1.79008	0.410546	4.36025	1.29916e-05	0.000921897
ENSG00000152926|ZNF117	153.245	1.99287	0.457033	4.36045	1.29797e-05	0.000921897	GO:0006355: regulation of transcription, DNA-templated;GO:0006357: regulation of transcription by RNA polymerase II	GO:0005634: nucleus	GO:0000978: RNA polymerase II cis-regulatory region sequence-specific DNA binding;GO:0000981: DNA-binding transcription factor activity, RNA polymerase II-specific;GO:0003700: DNA-binding transcription factor activity;GO:0008270: zinc ion binding
ENSG00000069956|MAPK6	4669.79	-1.24862	0.286906	-4.352	1.34902e-05	0.000953171	GO:0000165: MAPK cascade;GO:0006468: protein phosphorylation;GO:0007049: cell cycle;GO:0007165: signal transduction;GO:0035556: intracellular signal transduction;GO:0060999: positive regulation of dendritic spine development	GO:0005634: nucleus;GO:0005634: nucleus;GO:0005654: nucleoplasm;GO:0005737: cytoplasm;GO:0005737: cytoplasm;GO:0005829: cytosol;GO:0005829: cytosol;GO:0032156: septin cytoskeleton;GO:0032991: protein-containing complex	GO:0004674: protein serine/threonine kinase activity;GO:0004674: protein serine/threonine kinase activity;GO:0004674: protein serine/threonine kinase activity;GO:0004707: MAP kinase activity;GO:0004707: MAP kinase activity;GO:0005515: protein binding;GO:0005524: ATP binding;GO:0019901: protein kinase binding;GO:0046982: protein heterodimerization activity;GO:0106310: protein serine kinase activity
ENSG00000117984|CTSD	10262	1.36743	0.314739	4.34464	1.39502e-05	0.000981462	GO:0006508: proteolysis;GO:0006508: proteolysis;GO:0019886: antigen processing and presentation of exogenous peptide antigen via MHC class II;GO:0042159: lipoprotein catabolic process;GO:0043065: positive regulation of apoptotic process;GO:0043280: positive regulation of cysteine-type endopeptidase activity involved in apoptotic process;GO:0070201: regulation of establishment of protein localizat…	GO:0005576: extracellular region;GO:0005576: extracellular region;GO:0005576: extracellular region;GO:0005615: extracellular space;GO:0005615: extracellular space;GO:0005764: lysosome;GO:0005764: lysosome;GO:0005765: lysosomal membrane;GO:0010008: endosome membrane;GO:0035580: specific granule lumen;GO:0042470: melanosome;GO:0043202: lysosomal lumen;GO:0045121: membrane raft;GO:0062023: collagen-…	GO:0004190: aspartic-type endopeptidase activity;GO:0004197: cysteine-type endopeptidase activity;GO:0005515: protein binding;GO:0008233: peptidase activity;GO:0008233: peptidase activity;GO:0070001: aspartic-type peptidase activity
ENSG00000135406|PRPH	56.4552	2.62925	0.605467	4.34252	1.40858e-05	0.000986784	GO:0045104: intermediate filament cytoskeleton organization	GO:0005737: cytoplasm;GO:0005882: intermediate filament;GO:0016020: membrane;GO:0030424: axon;GO:0043204: perikaryon;GO:0045098: type III intermediate filament;GO:0070062: extracellular exosome	GO:0005198: structural molecule activity;GO:0005515: protein binding
ENSG00000103426|CORO7-PAM16	156.823	-1.81313	0.418966	-4.32764	1.50716e-05	0.00104823
ENSG00000215018|COL28A1	131.243	1.78642	0.41282	4.32737	1.50902e-05	0.00104823	GO:0007155: cell adhesion;GO:0010951: negative regulation of endopeptidase activity;GO:0030198: extracellular matrix organization	GO:0005576: extracellular region;GO:0005581: collagen trimer;GO:0005604: basement membrane;GO:0005615: extracellular space;GO:0005788: endoplasmic reticulum lumen;GO:0031012: extracellular matrix;GO:0062023: collagen-containing extracellular matrix	GO:0004867: serine-type endopeptidase inhibitor activity;GO:0005201: extracellular matrix structural constituent;GO:0030020: extracellular matrix structural constituent conferring tensile strength
ENSG00000163431|LMOD1	807.001	2.22827	0.515084	4.32603	1.51818e-05	0.00105016	GO:0006936: muscle contraction;GO:0007015: actin filament organization;GO:0030239: myofibril assembly;GO:0030838: positive regulation of actin filament polymerization;GO:0045010: actin nucleation;GO:0051694: pointed-end actin filament capping	GO:0005829: cytosol;GO:0005829: cytosol;GO:0005856: cytoskeleton;GO:0005865: striated muscle thin filament;GO:0005884: actin filament;GO:0016020: membrane;GO:0030016: myofibril;GO:0030016: myofibril;GO:0030017: sarcomere	GO:0003779: actin binding;GO:0005523: tropomyosin binding
ENSG00000163874|ZC3H12A	1483.84	-1.24742	0.289366	-4.31088	1.62605e-05	0.00112007	GO:0000294: nuclear-transcribed mRNA catabolic process, endonucleolytic cleavage-dependent decay;GO:0000294: nuclear-transcribed mRNA catabolic process, endonucleolytic cleavage-dependent decay;GO:0001525: angiogenesis;GO:0001933: negative regulation of protein phosphorylation;GO:0002230: positive regulation of defense response to virus by host;GO:0002757: immune response-activating signal transd…	GO:0000932: P-body;GO:0005634: nucleus;GO:0005634: nucleus;GO:0005654: nucleoplasm;GO:0005737: cytoplasm;GO:0005791: rough endoplasmic reticulum;GO:0005856: cytoskeleton;GO:0030867: rough endoplasmic reticulum membrane;GO:0032991: protein-containing complex;GO:0036464: cytoplasmic ribonucleoprotein granule;GO:0036464: cytoplasmic ribonucleoprotein granule;GO:0042406: extrinsic component of endopl…	GO:0003677: DNA binding;GO:0003682: chromatin binding;GO:0003723: RNA binding;GO:0003729: mRNA binding;GO:0003729: mRNA binding;GO:0003730: mRNA 3'-UTR binding;GO:0004521: endoribonuclease activity;GO:0004521: endoribonuclease activity;GO:0004532: exoribonuclease activity;GO:0004540: ribonuclease activity;GO:0004843: thiol-dependent deubiquitinase;GO:0005515: protein binding;GO:0035198: miRNA bin…
ENSG00000225339|AL354740.1	114.178	1.90773	0.442894	4.30742	1.6517e-05	0.00113299
ENSG00000288622|AC010442.3	673.031	-1.61855	0.375866	-4.30618	1.66097e-05	0.00113463
ENSG00000122861|PLAU	3229.07	-1.59786	0.37127	-4.30376	1.67923e-05	0.00113766	GO:0001666: response to hypoxia;GO:0006508: proteolysis;GO:0006935: chemotaxis;GO:0007165: signal transduction;GO:0007596: blood coagulation;GO:0010469: regulation of signaling receptor activity;GO:0014909: smooth muscle cell migration;GO:0014910: regulation of smooth muscle cell migration;GO:0030335: positive regulation of cell migration;GO:0031639: plasminogen activation;GO:0031639: plasminogen…	GO:0005576: extracellular region;GO:0005615: extracellular space;GO:0005615: extracellular space;GO:0005886: plasma membrane;GO:0005925: focal adhesion;GO:0009986: cell surface;GO:0035579: specific granule membrane;GO:0070062: extracellular exosome;GO:0070821: tertiary granule membrane	GO:0004252: serine-type endopeptidase activity;GO:0004252: serine-type endopeptidase activity;GO:0005515: protein binding
ENSG00000100302|RASD2	1209.25	-1.41096	0.327778	-4.30462	1.67273e-05	0.00113766	GO:0007626: locomotory behavior;GO:0031397: negative regulation of protein ubiquitination;GO:0033235: positive regulation of protein sumoylation;GO:0043949: regulation of cAMP-mediated signaling;GO:0051897: positive regulation of protein kinase B signaling	GO:0005886: plasma membrane	GO:0003924: GTPase activity;GO:0005525: GTP binding;GO:0031624: ubiquitin conjugating enzyme binding;GO:0031681: G-protein beta-subunit binding;GO:0043548: phosphatidylinositol 3-kinase binding
ENSG00000274512|TBC1D3L	808.216	1.51478	0.352168	4.30129	1.6981e-05	0.00114573	GO:0006886: intracellular protein transport;GO:0090630: activation of GTPase activity	GO:0005886: plasma membrane	GO:0005096: GTPase activator activity
ENSG00000157064|NMNAT2	4059.6	-1.27706	0.297548	-4.29195	1.77111e-05	0.00119011	GO:0009165: nucleotide biosynthetic process;GO:0009435: NAD biosynthetic process;GO:0009435: NAD biosynthetic process	GO:0000139: Golgi membrane;GO:0005770: late endosome;GO:0005794: Golgi apparatus;GO:0005794: Golgi apparatus;GO:0005802: trans-Golgi network;GO:0005829: cytosol;GO:0030424: axon;GO:0030659: cytoplasmic vesicle membrane;GO:0045202: synapse	GO:0000309: nicotinamide-nucleotide adenylyltransferase activity;GO:0004515: nicotinate-nucleotide adenylyltransferase activity;GO:0004515: nicotinate-nucleotide adenylyltransferase activity;GO:0005524: ATP binding
ENSG00000103260|METRN	1018.58	1.46792	0.342174	4.28997	1.78694e-05	0.00119587	GO:0007165: signal transduction;GO:0010001: glial cell differentiation;GO:0050772: positive regulation of axonogenesis	GO:0005615: extracellular space	GO:0005179: hormone activity
ENSG00000125735|TNFSF14	171.749	-1.68712	0.393459	-4.28792	1.80351e-05	0.00120207	GO:0006915: apoptotic process;GO:0006955: immune response;GO:0007165: signal transduction;GO:0031295: T cell costimulation;GO:0042098: T cell proliferation;GO:0042110: T cell activation;GO:0043029: T cell homeostasis;GO:0043154: negative regulation of cysteine-type endopeptidase activity involved in apoptotic process;GO:0071260: cellular response to mechanical stimulus;GO:1901224: positive regula…	GO:0005615: extracellular space;GO:0005737: cytoplasm;GO:0005886: plasma membrane;GO:0016021: integral component of membrane	GO:0005102: signaling receptor binding;GO:0005125: cytokine activity;GO:0005164: tumor necrosis factor receptor binding;GO:0005515: protein binding;GO:0043027: cysteine-type endopeptidase inhibitor activity involved in apoptotic process
ENSG00000100934|SEC23A	3728.67	-1.2739	0.297847	-4.27703	1.894e-05	0.0012573	GO:0006886: intracellular protein transport;GO:0050790: regulation of catalytic activity;GO:0072659: protein localization to plasma membrane;GO:0090110: COPII-coated vesicle cargo loading;GO:0090110: COPII-coated vesicle cargo loading;GO:0090110: COPII-coated vesicle cargo loading	GO:0000139: Golgi membrane;GO:0005789: endoplasmic reticulum membrane;GO:0005829: cytosol;GO:0005829: cytosol;GO:0012507: ER to Golgi transport vesicle membrane;GO:0012507: ER to Golgi transport vesicle membrane;GO:0019898: extrinsic component of membrane;GO:0030127: COPII vesicle coat;GO:0030127: COPII vesicle coat;GO:0048471: perinuclear region of cytoplasm;GO:0070971: endoplasmic reticulum exi…	GO:0005096: GTPase activator activity;GO:0005515: protein binding;GO:0008270: zinc ion binding
ENSG00000284431|AL022238.3	442.288	1.79618	0.421332	4.2631	2.01607e-05	0.00133295
ENSG00000197635|DPP4	1848.83	1.2185	0.286893	4.24722	2.16442e-05	0.00142531	GO:0001662: behavioral fear response;GO:0001666: response to hypoxia;GO:0006508: proteolysis;GO:0006508: proteolysis;GO:0007155: cell adhesion;GO:0008284: positive regulation of cell population proliferation;GO:0010716: negative regulation of extracellular matrix disassembly;GO:0031295: T cell costimulation;GO:0033632: regulation of cell-cell adhesion mediated by integrin;GO:0035641: locomotory e…	GO:0005576: extracellular region;GO:0005765: lysosomal membrane;GO:0005886: plasma membrane;GO:0005886: plasma membrane;GO:0005886: plasma membrane;GO:0005925: focal adhesion;GO:0009986: cell surface;GO:0016020: membrane;GO:0016021: integral component of membrane;GO:0016324: apical plasma membrane;GO:0030027: lamellipodium;GO:0030139: endocytic vesicle;GO:0031258: lamellipodium membrane;GO:004512…	GO:0001618: virus receptor activity;GO:0002020: protease binding;GO:0004177: aminopeptidase activity;GO:0004252: serine-type endopeptidase activity;GO:0005102: signaling receptor binding;GO:0005515: protein binding;GO:0008236: serine-type peptidase activity;GO:0008239: dipeptidyl-peptidase activity;GO:0008239: dipeptidyl-peptidase activity;GO:0042802: identical protein binding;GO:0042803: protein…
ENSG00000113645|WWC1	57.6859	-2.6578	0.626443	-4.24268	2.20864e-05	0.00144864	GO:0000122: negative regulation of transcription by RNA polymerase II;GO:0006355: regulation of transcription, DNA-templated;GO:0016477: cell migration;GO:0016477: cell migration;GO:0030010: establishment of cell polarity;GO:0032386: regulation of intracellular transport;GO:0035330: regulation of hippo signaling;GO:0035330: regulation of hippo signaling;GO:0035331: negative regulation of hippo si…	GO:0005634: nucleus;GO:0005737: cytoplasm;GO:0005737: cytoplasm;GO:0005829: cytosol;GO:0005829: cytosol;GO:0032587: ruffle membrane;GO:0032991: protein-containing complex;GO:0048471: perinuclear region of cytoplasm	GO:0003713: transcription coactivator activity;GO:0005515: protein binding;GO:0019900: kinase binding;GO:0019900: kinase binding;GO:0060090: molecular adaptor activity;GO:0060090: molecular adaptor activity
ENSG00000238045|AC009133.1	323.534	2.02255	0.4775	4.2357	2.27843e-05	0.00148849
ENSG00000079257|LXN	714.378	1.4241	0.336311	4.23446	2.29098e-05	0.00149077	GO:0006954: inflammatory response;GO:0010951: negative regulation of endopeptidase activity;GO:0050965: detection of temperature stimulus involved in sensory perception of pain	GO:0005615: extracellular space;GO:0005737: cytoplasm	GO:0005515: protein binding;GO:0008191: metalloendopeptidase inhibitor activity;GO:0008201: heparin binding
ENSG00000285188|AC008397.2	1361.5	1.38685	0.327597	4.23341	2.30171e-05	0.00149185
ENSG00000065485|PDIA5	2341.53	1.22788	0.290324	4.22936	2.34357e-05	0.00151303	GO:0006457: protein folding;GO:0006457: protein folding;GO:0022900: electron transport chain	GO:0005788: endoplasmic reticulum lumen;GO:0005789: endoplasmic reticulum membrane	GO:0003756: protein disulfide isomerase activity;GO:0003756: protein disulfide isomerase activity;GO:0005515: protein binding;GO:0015035: protein-disulfide reductase activity;GO:0016491: oxidoreductase activity
ENSG00000244242|IFITM10	2813.59	1.20401	0.285443	4.21805	2.46426e-05	0.00158473		GO:0005886: plasma membrane;GO:0016021: integral component of membrane
ENSG00000197696|NMB	387.314	1.36357	0.323928	4.2095	2.5594e-05	0.00163951	GO:0007165: signal transduction;GO:0007204: positive regulation of cytosolic calcium ion concentration;GO:0007218: neuropeptide signaling pathway;GO:0007267: cell-cell signaling;GO:0008284: positive regulation of cell population proliferation;GO:0042593: glucose homeostasis;GO:0046887: positive regulation of hormone secretion;GO:0046888: negative regulation of hormone secretion;GO:0050482: arachi…	GO:0005576: extracellular region;GO:0043005: neuron projection	GO:0005179: hormone activity;GO:0005184: neuropeptide hormone activity;GO:0005515: protein binding;GO:0031710: neuromedin B receptor binding
ENSG00000119938|PPP1R3C	1960.88	1.22551	0.291232	4.20801	2.57629e-05	0.00164393	GO:0005977: glycogen metabolic process;GO:0005978: glycogen biosynthetic process;GO:0005979: regulation of glycogen biosynthetic process;GO:0006470: protein dephosphorylation	GO:0000164: protein phosphatase type 1 complex;GO:0005829: cytosol	GO:0004722: protein serine/threonine phosphatase activity;GO:0005515: protein binding;GO:0008157: protein phosphatase 1 binding;GO:0019903: protein phosphatase binding;GO:2001069: glycogen binding
ENSG00000136158|SPRY2	2462.48	-1.18393	0.281682	-4.20306	2.63333e-05	0.00167384	GO:0000132: establishment of mitotic spindle orientation;GO:0007605: sensory perception of sound;GO:0008285: negative regulation of cell population proliferation;GO:0010628: positive regulation of gene expression;GO:0010719: negative regulation of epithelial to mesenchymal transition;GO:0010801: negative regulation of peptidyl-threonine phosphorylation;GO:0016525: negative regulation of angiogene…	GO:0005634: nucleus;GO:0005829: cytosol;GO:0005829: cytosol;GO:0005829: cytosol;GO:0005856: cytoskeleton;GO:0005886: plasma membrane;GO:0015629: actin cytoskeleton;GO:0015630: microtubule cytoskeleton;GO:0016020: membrane;GO:0032587: ruffle membrane;GO:1990752: microtubule end	GO:0005515: protein binding;GO:0019901: protein kinase binding;GO:0030291: protein serine/threonine kinase inhibitor activity;GO:0043539: protein serine/threonine kinase activator activity
ENSG00000145242|EPHA5	161.416	-1.91151	0.455906	-4.19278	2.75557e-05	0.00174481	GO:0007169: transmembrane receptor protein tyrosine kinase signaling pathway;GO:0007275: multicellular organism development;GO:0007411: axon guidance;GO:0007411: axon guidance;GO:0018108: peptidyl-tyrosine phosphorylation;GO:0019933: cAMP-mediated signaling;GO:0021766: hippocampus development;GO:0032793: positive regulation of CREB transcription factor activity;GO:0032956: regulation of actin cyt…	GO:0005791: rough endoplasmic reticulum;GO:0005886: plasma membrane;GO:0005886: plasma membrane;GO:0005887: integral component of plasma membrane;GO:0009897: external side of plasma membrane;GO:0030424: axon;GO:0030425: dendrite;GO:0043005: neuron projection;GO:0043025: neuronal cell body;GO:0043235: receptor complex;GO:0048471: perinuclear region of cytoplasm	GO:0004714: transmembrane receptor protein tyrosine kinase activity;GO:0005003: ephrin receptor activity;GO:0005004: GPI-linked ephrin receptor activity;GO:0005005: transmembrane-ephrin receptor activity;GO:0005005: transmembrane-ephrin receptor activity;GO:0005524: ATP binding
ENSG00000054392|HHAT	252.643	1.63375	0.389745	4.19184	2.76704e-05	0.00174536	GO:0007224: smoothened signaling pathway;GO:0018009: N-terminal peptidyl-L-cysteine N-palmitoylation;GO:0018345: protein palmitoylation	GO:0005783: endoplasmic reticulum;GO:0005783: endoplasmic reticulum;GO:0005789: endoplasmic reticulum membrane;GO:0005794: Golgi apparatus;GO:0016021: integral component of membrane	GO:0005515: protein binding;GO:0005525: GTP binding;GO:0008374: O-acyltransferase activity;GO:0016409: palmitoyltransferase activity;GO:0016746: acyltransferase activity
ENSG00000152049|KCNE4	634.166	1.50133	0.359316	4.17829	2.93705e-05	0.00184552	GO:0060307: regulation of ventricular cardiac muscle cell membrane repolarization;GO:0086005: ventricular cardiac muscle cell action potential;GO:0086011: membrane repolarization during action potential;GO:0086091: regulation of heart rate by cardiac conduction;GO:0097623: potassium ion export across plasma membrane;GO:0098915: membrane repolarization during ventricular cardiac muscle cell action…	GO:0016021: integral component of membrane;GO:0016324: apical plasma membrane	GO:0005251: delayed rectifier potassium channel activity;GO:0005515: protein binding;GO:0015459: potassium channel regulator activity;GO:0044325: transmembrane transporter binding;GO:0044325: transmembrane transporter binding;GO:1902282: voltage-gated potassium channel activity involved in ventricular cardiac muscle cell action potential repolarization
ENSG00000171608|PIK3CD	1413.82	-1.33046	0.318609	-4.17584	2.96892e-05	0.00185846	GO:0001779: natural killer cell differentiation;GO:0001819: positive regulation of cytokine production;GO:0001938: positive regulation of endothelial cell proliferation;GO:0002250: adaptive immune response;GO:0002551: mast cell chemotaxis;GO:0002679: respiratory burst involved in defense response;GO:0006468: protein phosphorylation;GO:0006954: inflammatory response;GO:0007165: signal transduction…	GO:0005737: cytoplasm;GO:0005829: cytosol;GO:0005886: plasma membrane;GO:0005886: plasma membrane;GO:0005942: phosphatidylinositol 3-kinase complex;GO:0005942: phosphatidylinositol 3-kinase complex;GO:0016020: membrane	GO:0005515: protein binding;GO:0005524: ATP binding;GO:0016301: kinase activity;GO:0016303: 1-phosphatidylinositol-3-kinase activity;GO:0016303: 1-phosphatidylinositol-3-kinase activity;GO:0035004: phosphatidylinositol 3-kinase activity;GO:0035005: 1-phosphatidylinositol-4-phosphate 3-kinase activity;GO:0046934: phosphatidylinositol-4,5-bisphosphate 3-kinase activity;GO:0052742: phosphatidylinosi…
ENSG00000258555|SPECC1L-ADORA2A	430.742	-1.4322	0.343561	-4.16868	3.06363e-05	0.00191048
ENSG00000179456|ZBTB18	524.006	-1.36929	0.329138	-4.16021	3.17953e-05	0.00196796	GO:0000122: negative regulation of transcription by RNA polymerase II;GO:0000122: negative regulation of transcription by RNA polymerase II;GO:0006357: regulation of transcription by RNA polymerase II;GO:0007519: skeletal muscle tissue development;GO:0045892: negative regulation of transcription, DNA-templated;GO:0045944: positive regulation of transcription by RNA polymerase II	GO:0000792: heterochromatin;GO:0005634: nucleus;GO:0005634: nucleus;GO:0005634: nucleus;GO:0005654: nucleoplasm;GO:0016607: nuclear speck	GO:0000978: RNA polymerase II cis-regulatory region sequence-specific DNA binding;GO:0000981: DNA-binding transcription factor activity, RNA polymerase II-specific;GO:0001227: DNA-binding transcription repressor activity, RNA polymerase II-specific;GO:0003677: DNA binding;GO:0005515: protein binding;GO:0043565: sequence-specific DNA binding;GO:0046872: metal ion binding;GO:1990837: sequence-speci…
ENSG00000145569|OTULINL	364.273	-1.37578	0.3307	-4.1602	3.17973e-05	0.00196796	GO:0016579: protein deubiquitination	GO:0005635: nuclear envelope;GO:0005737: cytoplasm;GO:0042406: extrinsic component of endoplasmic reticulum membrane	GO:0005515: protein binding;GO:0019783: ubiquitin-like protein-specific protease activity;GO:0043130: ubiquitin binding
ENSG00000064201|TSPAN32	29.7415	3.5033	0.845612	4.14291	3.42923e-05	0.00211443	GO:0007010: cytoskeleton organization;GO:0007229: integrin-mediated signaling pathway;GO:0007267: cell-cell signaling;GO:0008285: negative regulation of cell population proliferation;GO:0030886: negative regulation of myeloid dendritic cell activation;GO:0042832: defense response to protozoan;GO:0050688: regulation of defense response to virus;GO:0051604: protein maturation;GO:0070527: platelet a…	GO:0005887: integral component of plasma membrane;GO:0009986: cell surface;GO:0070442: integrin alphaIIb-beta3 complex	GO:0003674: molecular_function
ENSG00000163346|PBXIP1	6688.22	1.19031	0.287533	4.13974	3.47702e-05	0.00213322	GO:0002532: production of molecular mediator involved in inflammatory response;GO:0007155: cell adhesion;GO:0007275: multicellular organism development;GO:0016477: cell migration;GO:0022617: extracellular matrix disassembly;GO:0030154: cell differentiation;GO:0030177: positive regulation of Wnt signaling pathway;GO:0045892: negative regulation of transcription, DNA-templated;GO:0045944: positive …	GO:0000785: chromatin;GO:0005634: nucleus;GO:0005667: transcription regulator complex;GO:0005829: cytosol;GO:0005874: microtubule;GO:0016020: membrane	GO:0001228: DNA-binding transcription activator activity, RNA polymerase II-specific;GO:0003714: transcription corepressor activity;GO:0005515: protein binding
ENSG00000155622|XAGE2	180.449	1.90723	0.460776	4.13917	3.48561e-05	0.00213322			GO:0005515: protein binding
ENSG00000184254|ALDH1A3	17658.2	-1.34993	0.328174	-4.11347	3.89756e-05	0.00237196	GO:0002072: optic cup morphogenesis involved in camera-type eye development;GO:0002138: retinoic acid biosynthetic process;GO:0007626: locomotory behavior;GO:0021768: nucleus accumbens development;GO:0031076: embryonic camera-type eye development;GO:0042472: inner ear morphogenesis;GO:0042572: retinol metabolic process;GO:0042573: retinoic acid metabolic process;GO:0042574: retinal metabolic proc…	GO:0005737: cytoplasm;GO:0005829: cytosol;GO:0070062: extracellular exosome	GO:0001758: retinal dehydrogenase activity;GO:0004029: aldehyde dehydrogenase (NAD+) activity;GO:0004030: aldehyde dehydrogenase [NAD(P)+] activity;GO:0042803: protein homodimerization activity;GO:0070324: thyroid hormone binding;GO:0070403: NAD+ binding
ENSG00000278048|U2	38.5684	3.14271	0.764081	4.11306	3.90452e-05	0.00237196
ENSG00000206596|RNU1-27P	71.9165	3.26908	0.795528	4.10932	3.96822e-05	0.00238426
ENSG00000144583|MARCHF4	510.044	-1.35691	0.330195	-4.10943	3.96642e-05	0.00238426	GO:0016567: protein ubiquitination	GO:0000139: Golgi membrane;GO:0005795: Golgi stack;GO:0005802: trans-Golgi network;GO:0016021: integral component of membrane	GO:0004842: ubiquitin-protein transferase activity;GO:0008270: zinc ion binding
ENSG00000164442|CITED2	1424.41	1.18839	0.289151	4.10992	3.95803e-05	0.00238426	GO:0000122: negative regulation of transcription by RNA polymerase II;GO:0001570: vasculogenesis;GO:0001666: response to hypoxia;GO:0001666: response to hypoxia;GO:0001829: trophectodermal cell differentiation;GO:0001843: neural tube closure;GO:0001889: liver development;GO:0001892: embryonic placenta development;GO:0001947: heart looping;GO:0002089: lens morphogenesis in camera-type eye;GO:00022…	GO:0000785: chromatin;GO:0005634: nucleus;GO:0005634: nucleus;GO:0005654: nucleoplasm;GO:0032991: protein-containing complex	GO:0003682: chromatin binding;GO:0003713: transcription coactivator activity;GO:0003713: transcription coactivator activity;GO:0003714: transcription corepressor activity;GO:0003714: transcription corepressor activity;GO:0005515: protein binding;GO:0019904: protein domain specific binding;GO:0035035: histone acetyltransferase binding;GO:0046332: SMAD binding;GO:0050693: LBD domain binding;GO:0061…
ENSG00000128342|LIF	3195.07	-1.41333	0.344604	-4.10131	4.10826e-05	0.00245052	GO:0001974: blood vessel remodeling;GO:0006955: immune response;GO:0007260: tyrosine phosphorylation of STAT protein;GO:0007275: multicellular organism development;GO:0007566: embryo implantation;GO:0008284: positive regulation of cell population proliferation;GO:0008284: positive regulation of cell population proliferation;GO:0008284: positive regulation of cell population proliferation;GO:00082…	GO:0005576: extracellular region;GO:0005615: extracellular space;GO:0005615: extracellular space;GO:0005829: cytosol	GO:0005102: signaling receptor binding;GO:0005125: cytokine activity;GO:0005125: cytokine activity;GO:0005146: leukemia inhibitory factor receptor binding;GO:0005146: leukemia inhibitory factor receptor binding;GO:0005146: leukemia inhibitory factor receptor binding;GO:0005515: protein binding;GO:0008083: growth factor activity;GO:0008083: growth factor activity
ENSG00000077264|PAK3	359.411	-1.72752	0.421199	-4.10144	4.10585e-05	0.00245052	GO:0000165: MAPK cascade;GO:0002223: stimulatory C-type lectin receptor signaling pathway;GO:0006468: protein phosphorylation;GO:0007409: axonogenesis;GO:0010763: positive regulation of fibroblast migration;GO:0016358: dendrite development;GO:0030833: regulation of actin filament polymerization;GO:0032956: regulation of actin cytoskeleton organization;GO:0035556: intracellular signal transduction…	GO:0005737: cytoplasm;GO:0005768: endosome;GO:0005829: cytosol;GO:0005886: plasma membrane;GO:0014069: postsynaptic density;GO:0098978: glutamatergic synapse	GO:0004674: protein serine/threonine kinase activity;GO:0004674: protein serine/threonine kinase activity;GO:0004674: protein serine/threonine kinase activity;GO:0004674: protein serine/threonine kinase activity;GO:0004708: MAP kinase kinase activity;GO:0005515: protein binding;GO:0005524: ATP binding;GO:0017124: SH3 domain binding;GO:0031267: small GTPase binding;GO:0046872: metal ion binding;GO…
ENSG00000086570|FAT2	559.325	2.03826	0.497488	4.09711	4.18345e-05	0.00248636	GO:0007156: homophilic cell adhesion via plasma membrane adhesion molecules;GO:0010631: epithelial cell migration;GO:0010631: epithelial cell migration;GO:0031589: cell-substrate adhesion;GO:0098609: cell-cell adhesion	GO:0005794: Golgi apparatus;GO:0005886: plasma membrane;GO:0005912: adherens junction;GO:0005912: adherens junction;GO:0016021: integral component of membrane;GO:0070062: extracellular exosome	GO:0005509: calcium ion binding
ENSG00000106333|PCOLCE	3076.93	1.24792	0.304756	4.09481	4.22514e-05	0.0025021	GO:0007275: multicellular organism development;GO:0010952: positive regulation of peptidase activity	GO:0005576: extracellular region;GO:0005615: extracellular space;GO:0062023: collagen-containing extracellular matrix;GO:0070062: extracellular exosome	GO:0005201: extracellular matrix structural constituent;GO:0005515: protein binding;GO:0005518: collagen binding;GO:0008201: heparin binding;GO:0016504: peptidase activator activity
ENSG00000163050|COQ8A	446.758	1.32226	0.322994	4.09375	4.24447e-05	0.00250454	GO:0006468: protein phosphorylation;GO:0006744: ubiquinone biosynthetic process;GO:0006744: ubiquinone biosynthetic process;GO:0006744: ubiquinone biosynthetic process;GO:0016310: phosphorylation	GO:0005739: mitochondrion;GO:0016021: integral component of membrane;GO:0031314: extrinsic component of mitochondrial inner membrane	GO:0004672: protein kinase activity;GO:0005515: protein binding;GO:0005524: ATP binding;GO:0016301: kinase activity;GO:0016301: kinase activity;GO:0043531: ADP binding
ENSG00000244165|P2RY11	1319.58	1.54562	0.377743	4.09172	4.28181e-05	0.00251755	GO:0006952: defense response;GO:0007186: G protein-coupled receptor signaling pathway;GO:0007190: activation of adenylate cyclase activity;GO:0007200: phospholipase C-activating G protein-coupled receptor signaling pathway;GO:0019722: calcium-mediated signaling;GO:0023041: neuronal signal transduction;GO:0023041: neuronal signal transduction;GO:0035589: G protein-coupled purinergic nucleotide rec…	GO:0005886: plasma membrane;GO:0005887: integral component of plasma membrane	GO:0030594: neurotransmitter receptor activity;GO:0030594: neurotransmitter receptor activity;GO:0038023: signaling receptor activity;GO:0045031: G protein-coupled ATP receptor activity;GO:0045031: G protein-coupled ATP receptor activity
ENSG00000171346|KRT15	912.641	1.21739	0.297669	4.08976	4.31815e-05	0.00252988	GO:0007010: cytoskeleton organization;GO:0008544: epidermis development	GO:0005634: nucleus;GO:0005829: cytosol;GO:0005882: intermediate filament;GO:0070062: extracellular exosome	GO:0005200: structural constituent of cytoskeleton;GO:0005515: protein binding;GO:0097110: scaffold protein binding
ENSG00000185432|METTL7A	782.604	1.25767	0.307604	4.08859	4.34005e-05	0.00253339	GO:0032259: methylation	GO:0005576: extracellular region;GO:0005783: endoplasmic reticulum;GO:0005811: lipid droplet;GO:0016020: membrane;GO:1904724: tertiary granule lumen	GO:0005515: protein binding;GO:0008168: methyltransferase activity
ENSG00000244607|CCDC13	46.9439	2.51334	0.614839	4.0878	4.35491e-05	0.00253339	GO:0006974: cellular response to DNA damage stimulus;GO:0031122: cytoplasmic microtubule organization;GO:0031122: cytoplasmic microtubule organization;GO:1905515: non-motile cilium assembly;GO:1905515: non-motile cilium assembly	GO:0005654: nucleoplasm;GO:0005813: centrosome;GO:0005829: cytosol;GO:0034451: centriolar satellite;GO:0034451: centriolar satellite;GO:0042995: cell projection	GO:0005515: protein binding
ENSG00000105383|CD33	593.138	1.64694	0.403147	4.08521	4.40373e-05	0.00254894	GO:0002765: immune response-inhibiting signal transduction;GO:0007155: cell adhesion;GO:0007165: signal transduction;GO:0007267: cell-cell signaling;GO:0008285: negative regulation of cell population proliferation;GO:0032691: negative regulation of interleukin-1 beta production;GO:0032717: negative regulation of interleukin-8 production;GO:0032720: negative regulation of tumor necrosis factor pro…	GO:0005654: nucleoplasm;GO:0005777: peroxisome;GO:0005794: Golgi apparatus;GO:0005886: plasma membrane;GO:0005886: plasma membrane;GO:0005886: plasma membrane;GO:0005887: integral component of plasma membrane;GO:0009897: external side of plasma membrane;GO:0035579: specific granule membrane;GO:0070821: tertiary granule membrane	GO:0005515: protein binding;GO:0019903: protein phosphatase binding;GO:0030246: carbohydrate binding;GO:0033691: sialic acid binding;GO:0033691: sialic acid binding;GO:0038023: signaling receptor activity
ENSG00000164105|SAP30	8704.22	1.3057	0.319653	4.08474	4.4126e-05	0.00254894	GO:0000122: negative regulation of transcription by RNA polymerase II;GO:0006355: regulation of transcription, DNA-templated;GO:0035914: skeletal muscle cell differentiation;GO:0052472: modulation by host of symbiont transcription	GO:0000118: histone deacetylase complex;GO:0000118: histone deacetylase complex;GO:0005654: nucleoplasm;GO:0005654: nucleoplasm	GO:0003677: DNA binding;GO:0003712: transcription coregulator activity;GO:0003714: transcription corepressor activity;GO:0005515: protein binding;GO:0046872: metal ion binding
ENSG00000100100|PIK3IP1	153.54	1.64876	0.404107	4.08002	4.50311e-05	0.00259212	GO:0006508: proteolysis;GO:0014067: negative regulation of phosphatidylinositol 3-kinase signaling;GO:0014067: negative regulation of phosphatidylinositol 3-kinase signaling;GO:0043553: negative regulation of phosphatidylinositol 3-kinase activity;GO:0043553: negative regulation of phosphatidylinositol 3-kinase activity;GO:0043553: negative regulation of phosphatidylinositol 3-kinase activity	GO:0005886: plasma membrane;GO:0016021: integral component of membrane	GO:0005515: protein binding;GO:0036313: phosphatidylinositol 3-kinase catalytic subunit binding;GO:0036313: phosphatidylinositol 3-kinase catalytic subunit binding
ENSG00000247982|LINC00926	133.459	1.70819	0.41924	4.07449	4.61155e-05	0.00264529
ENSG00000102904|TSNAXIP1	259.597	1.66149	0.408287	4.06943	4.7129e-05	0.00269405	GO:0007283: spermatogenesis;GO:0008150: biological_process;GO:0030154: cell differentiation	GO:0005575: cellular_component;GO:0005737: cytoplasm;GO:0048471: perinuclear region of cytoplasm	GO:0003674: molecular_function;GO:0005515: protein binding
ENSG00000129295|LRRC6	1044.11	1.26546	0.312038	4.05549	5.00299e-05	0.00284997	GO:0003341: cilium movement;GO:0003351: epithelial cilium movement involved in extracellular fluid movement;GO:0008584: male gonad development;GO:0030317: flagellated sperm motility;GO:0030317: flagellated sperm motility;GO:0036158: outer dynein arm assembly;GO:0036158: outer dynein arm assembly;GO:0036158: outer dynein arm assembly;GO:0036159: inner dynein arm assembly;GO:0043393: regulation of …	GO:0005576: extracellular region;GO:0005737: cytoplasm;GO:0005737: cytoplasm;GO:0005737: cytoplasm;GO:0005829: cytosol;GO:0005929: cilium;GO:0031514: motile cilium;GO:0090651: apical cytoplasm;GO:0120293: dynein axonemal particle	GO:0003674: molecular_function;GO:0005515: protein binding
ENSG00000224569|AC095052.1	53.4624	2.63433	0.651059	4.04622	5.20509e-05	0.00295488
ENSG00000100433|KCNK10	63.5847	-2.1638	0.535121	-4.04357	5.26435e-05	0.00297825	GO:0007165: signal transduction;GO:0007613: memory;GO:0030322: stabilization of membrane potential;GO:0034765: regulation of ion transmembrane transport;GO:0071805: potassium ion transmembrane transport	GO:0005886: plasma membrane;GO:0005887: integral component of plasma membrane	GO:0005244: voltage-gated ion channel activity;GO:0005267: potassium channel activity;GO:0022841: potassium ion leak channel activity
ENSG00000184270|H2AC21	53.7077	2.90391	0.718732	4.04033	5.33756e-05	0.00300932	GO:0008150: biological_process;GO:0031507: heterochromatin assembly	GO:0000786: nucleosome;GO:0005634: nucleus;GO:0070062: extracellular exosome	GO:0003674: molecular_function;GO:0003677: DNA binding;GO:0005515: protein binding;GO:0046982: protein heterodimerization activity
ENSG00000128422|KRT17	47.7034	2.5412	0.63139	4.02478	5.70297e-05	0.00320437	GO:0030307: positive regulation of cell growth;GO:0031069: hair follicle morphogenesis;GO:0031424: keratinization;GO:0045109: intermediate filament organization;GO:0045727: positive regulation of translation;GO:0051798: positive regulation of hair follicle development	GO:0005829: cytosol;GO:0005882: intermediate filament;GO:0045111: intermediate filament cytoskeleton;GO:0071944: cell periphery	GO:0005198: structural molecule activity;GO:0005515: protein binding
ENSG00000172020|GAP43	5336.25	1.14451	0.284697	4.02011	5.81703e-05	0.00325734	GO:0007205: protein kinase C-activating G protein-coupled receptor signaling pathway;GO:0009611: response to wounding;GO:0010001: glial cell differentiation;GO:0016198: axon choice point recognition;GO:0031103: axon regeneration;GO:0040008: regulation of growth;GO:0042246: tissue regeneration;GO:0045165: cell fate commitment;GO:0051489: regulation of filopodium assembly;GO:0099150: regulation of …	GO:0005737: cytoplasm;GO:0005886: plasma membrane;GO:0005886: plasma membrane;GO:0005886: plasma membrane;GO:0014069: postsynaptic density;GO:0030425: dendrite;GO:0031527: filopodium membrane;GO:0032584: growth cone membrane;GO:0043204: perikaryon;GO:0098982: GABA-ergic synapse	GO:0001786: phosphatidylserine binding;GO:0005515: protein binding;GO:0005516: calmodulin binding;GO:0035727: lysophosphatidic acid binding;GO:1901981: phosphatidylinositol phosphate binding
ENSG00000188610|FAM72B	424.214	-1.30785	0.325609	-4.01663	5.9037e-05	0.00329467		GO:0005829: cytosol;GO:0005829: cytosol;GO:0043231: intracellular membrane-bounded organelle
ENSG00000161850|KRT82	103.757	-1.85134	0.461623	-4.0105	6.05906e-05	0.00335859	GO:0008150: biological_process	GO:0005829: cytosol;GO:0045095: keratin filament	GO:0005515: protein binding;GO:0030280: structural constituent of skin epidermis
ENSG00000161513|FDXR	1794.46	1.26339	0.315015	4.01056	6.05743e-05	0.00335859	GO:0006091: generation of precursor metabolites and energy;GO:0006694: steroid biosynthetic process;GO:0006744: ubiquinone biosynthetic process;GO:0008203: cholesterol metabolic process	GO:0005739: mitochondrion;GO:0005739: mitochondrion;GO:0005743: mitochondrial inner membrane;GO:0005759: mitochondrial matrix	GO:0004324: ferredoxin-NADP+ reductase activity;GO:0015039: NADPH-adrenodoxin reductase activity;GO:0016491: oxidoreductase activity
ENSG00000236017|ASMTL-AS1	120.585	1.75833	0.438867	4.00653	6.16177e-05	0.00340407
ENSG00000196154|S100A4	237.392	1.56218	0.390221	4.00332	6.24592e-05	0.00343901	GO:0001837: epithelial to mesenchymal transition;GO:0043123: positive regulation of I-kappaB kinase/NF-kappaB signaling;GO:0043123: positive regulation of I-kappaB kinase/NF-kappaB signaling	GO:0005576: extracellular region;GO:0005615: extracellular space;GO:0005634: nucleus;GO:0005634: nucleus;GO:0043005: neuron projection;GO:0048471: perinuclear region of cytoplasm;GO:0048471: perinuclear region of cytoplasm;GO:0062023: collagen-containing extracellular matrix;GO:0070062: extracellular exosome	GO:0003723: RNA binding;GO:0003779: actin binding;GO:0005509: calcium ion binding;GO:0005515: protein binding;GO:0042802: identical protein binding;GO:0046914: transition metal ion binding;GO:0048306: calcium-dependent protein binding;GO:0050786: RAGE receptor binding;GO:0050786: RAGE receptor binding
ENSG00000149489|ROM1	718.979	1.69202	0.42297	4.00034	6.32524e-05	0.00347108	GO:0007155: cell adhesion;GO:0007601: visual perception;GO:0010468: regulation of gene expression;GO:0035845: photoreceptor cell outer segment organization;GO:0050908: detection of light stimulus involved in visual perception;GO:0051260: protein homooligomerization;GO:0051291: protein heterooligomerization;GO:0060219: camera-type eye photoreceptor cell differentiation;GO:0061298: retina vasculatu…	GO:0005887: integral component of plasma membrane;GO:0042622: photoreceptor outer segment membrane	GO:0005515: protein binding;GO:0042803: protein homodimerization activity
ENSG00000171368|TPPP	146.596	1.83118	0.457906	3.99903	6.36036e-05	0.00347876	GO:0001578: microtubule bundle formation;GO:0001578: microtubule bundle formation;GO:0001578: microtubule bundle formation;GO:0014003: oligodendrocyte development;GO:0030953: astral microtubule organization;GO:0031334: positive regulation of protein-containing complex assembly;GO:0031643: positive regulation of myelination;GO:0032273: positive regulation of protein polymerization;GO:0032273: posi…	GO:0005634: nucleus;GO:0005737: cytoplasm;GO:0005739: mitochondrion;GO:0005829: cytosol;GO:0005874: microtubule;GO:0005874: microtubule;GO:0048471: perinuclear region of cytoplasm;GO:0072686: mitotic spindle;GO:0097427: microtubule bundle;GO:0150051: postsynaptic Golgi apparatus	GO:0000287: magnesium ion binding;GO:0003924: GTPase activity;GO:0005515: protein binding;GO:0008017: microtubule binding;GO:0015631: tubulin binding;GO:0015631: tubulin binding;GO:0015631: tubulin binding;GO:0042803: protein homodimerization activity
ENSG00000206588|RNU1-28P	41.4886	3.25711	0.817163	3.98588	6.72317e-05	0.00366138
ENSG00000197008|ZNF138	158.72	1.61369	0.404908	3.98533	6.73873e-05	0.00366138	GO:0006355: regulation of transcription, DNA-templated;GO:0006357: regulation of transcription by RNA polymerase II	GO:0005634: nucleus	GO:0000978: RNA polymerase II cis-regulatory region sequence-specific DNA binding;GO:0000981: DNA-binding transcription factor activity, RNA polymerase II-specific;GO:0005515: protein binding;GO:0046872: metal ion binding
ENSG00000224715|Z82186.1	34.5477	-3.05993	0.768656	-3.98088	6.86594e-05	0.00370665
ENSG00000004838|ZMYND10	177.145	1.73584	0.436048	3.98084	6.86708e-05	0.00370665	GO:0003341: cilium movement;GO:0006457: protein folding;GO:0036158: outer dynein arm assembly;GO:0036158: outer dynein arm assembly;GO:0036158: outer dynein arm assembly;GO:0036159: inner dynein arm assembly;GO:0036159: inner dynein arm assembly;GO:0036159: inner dynein arm assembly;GO:0044458: motile cilium assembly;GO:0044458: motile cilium assembly;GO:0061512: protein localization to cilium;GO…	GO:0005737: cytoplasm;GO:0005737: cytoplasm;GO:0016324: apical plasma membrane;GO:0034451: centriolar satellite;GO:0034451: centriolar satellite;GO:0120293: dynein axonemal particle	GO:0005515: protein binding;GO:0044183: protein folding chaperone;GO:0046872: metal ion binding;GO:0060090: molecular adaptor activity
ENSG00000286905|AC108488.2	124.407	1.90255	0.47885	3.97316	7.09264e-05	0.00381589
ENSG00000206652|RNU1-1	78.4447	3.21417	0.809442	3.97084	7.16192e-05	0.00384061
ENSG00000261505|AL031714.1	89.5042	2.08486	0.525815	3.965	7.33945e-05	0.00392303
ENSG00000236453|AC003092.1	1192.34	-1.15477	0.291467	-3.96192	7.4349e-05	0.00396119
ENSG00000198732|SMOC1	9246.65	-1.10814	0.279953	-3.9583	7.54844e-05	0.00400871	GO:0001654: eye development;GO:0030154: cell differentiation;GO:0030198: extracellular matrix organization;GO:0045667: regulation of osteoblast differentiation;GO:0060173: limb development	GO:0005604: basement membrane;GO:0005615: extracellular space	GO:0005509: calcium ion binding;GO:0005515: protein binding;GO:0008201: heparin binding;GO:0050840: extracellular matrix binding
ENSG00000064687|ABCA7	403.627	1.30553	0.33026	3.95304	7.71646e-05	0.00408476	GO:0006869: lipid transport;GO:0006909: phagocytosis;GO:0007613: memory;GO:0008542: visual learning;GO:0010875: positive regulation of cholesterol efflux;GO:0018149: peptide cross-linking;GO:0019216: regulation of lipid metabolic process;GO:0033344: cholesterol efflux;GO:0033344: cholesterol efflux;GO:0033700: phospholipid efflux;GO:0033700: phospholipid efflux;GO:0033700: phospholipid efflux;GO:…	GO:0000139: Golgi membrane;GO:0001891: phagocytic cup;GO:0005783: endoplasmic reticulum;GO:0005794: Golgi apparatus;GO:0005886: plasma membrane;GO:0005886: plasma membrane;GO:0009986: cell surface;GO:0016021: integral component of membrane;GO:0030054: cell junction;GO:0031901: early endosome membrane;GO:0032587: ruffle membrane;GO:0043231: intracellular membrane-bounded organelle;GO:0097386: glia…	GO:0005319: lipid transporter activity;GO:0005524: ATP binding;GO:0005548: phospholipid transporter activity;GO:0034188: apolipoprotein A-I receptor activity;GO:0034188: apolipoprotein A-I receptor activity;GO:0042626: ATPase-coupled transmembrane transporter activity;GO:0090554: phosphatidylcholine floppase activity;GO:0090554: phosphatidylcholine floppase activity;GO:0090556: phosphatidylserine…
ENSG00000232748|AC135050.1	103.971	2.18279	0.552713	3.94922	7.84063e-05	0.00413719
ENSG00000184916|JAG2	41.1777	2.71104	0.686626	3.94836	7.86894e-05	0.00413886	GO:0001501: skeletal system development;GO:0001701: in utero embryonic development;GO:0003016: respiratory system process;GO:0007219: Notch signaling pathway;GO:0007283: spermatogenesis;GO:0009912: auditory receptor cell fate commitment;GO:0016331: morphogenesis of embryonic epithelium;GO:0030154: cell differentiation;GO:0030155: regulation of cell adhesion;GO:0030217: T cell differentiation;GO:0…	GO:0005886: plasma membrane;GO:0005887: integral component of plasma membrane	GO:0005112: Notch binding;GO:0005112: Notch binding;GO:0005509: calcium ion binding;GO:0005515: protein binding;GO:0008083: growth factor activity
ENSG00000163491|NEK10	456.632	1.31913	0.335158	3.93584	8.29062e-05	0.00434677	GO:0006468: protein phosphorylation;GO:0031954: positive regulation of protein autophosphorylation;GO:0043406: positive regulation of MAP kinase activity;GO:0043406: positive regulation of MAP kinase activity;GO:0070372: regulation of ERK1 and ERK2 cascade;GO:0120197: mucociliary clearance;GO:1902749: regulation of cell cycle G2/M phase transition;GO:1902749: regulation of cell cycle G2/M phase t…	GO:0005576: extracellular region;GO:1902911: protein kinase complex	GO:0004672: protein kinase activity;GO:0004674: protein serine/threonine kinase activity;GO:0004674: protein serine/threonine kinase activity;GO:0005524: ATP binding;GO:0046872: metal ion binding;GO:0106310: protein serine kinase activity
ENSG00000103241|FOXF1	22.0797	3.75089	0.956324	3.9222	8.77453e-05	0.00458588	GO:0000122: negative regulation of transcription by RNA polymerase II;GO:0001568: blood vessel development;GO:0001570: vasculogenesis;GO:0001701: in utero embryonic development;GO:0001756: somitogenesis;GO:0001763: morphogenesis of a branching structure;GO:0002053: positive regulation of mesenchymal cell proliferation;GO:0003197: endocardial cushion development;GO:0003214: cardiac left ventricle …	GO:0000785: chromatin;GO:0005634: nucleus;GO:0005634: nucleus;GO:0005667: transcription regulator complex	GO:0000977: RNA polymerase II transcription regulatory region sequence-specific DNA binding;GO:0000978: RNA polymerase II cis-regulatory region sequence-specific DNA binding;GO:0000981: DNA-binding transcription factor activity, RNA polymerase II-specific;GO:0000981: DNA-binding transcription factor activity, RNA polymerase II-specific;GO:0001228: DNA-binding transcription activator activity, RNA…
ENSG00000128872|TMOD2	1091.67	-1.14902	0.293029	-3.92118	8.81178e-05	0.00459077	GO:0006936: muscle contraction;GO:0007015: actin filament organization;GO:0007270: neuron-neuron synaptic transmission;GO:0007399: nervous system development;GO:0007611: learning or memory;GO:0030239: myofibril assembly;GO:0045745: positive regulation of G protein-coupled receptor signaling pathway;GO:0051694: pointed-end actin filament capping	GO:0005856: cytoskeleton;GO:0005865: striated muscle thin filament;GO:0030016: myofibril;GO:0030426: growth cone;GO:0045202: synapse	GO:0003779: actin binding;GO:0005515: protein binding;GO:0005523: tropomyosin binding
ENSG00000163331|DAPL1	144.631	1.93919	0.494658	3.92027	8.84497e-05	0.00459353	GO:0010507: negative regulation of autophagy;GO:0030154: cell differentiation;GO:0034198: cellular response to amino acid starvation;GO:0097190: apoptotic signaling pathway		GO:0005515: protein binding;GO:0070513: death domain binding
ENSG00000102003|SYP	261.264	1.4207	0.362512	3.91905	8.88996e-05	0.00460237	GO:0006897: endocytosis;GO:0016188: synaptic vesicle maturation;GO:0048168: regulation of neuronal synaptic plasticity;GO:0048169: regulation of long-term neuronal synaptic plasticity;GO:0048172: regulation of short-term neuronal synaptic plasticity;GO:0048488: synaptic vesicle endocytosis;GO:0048499: synaptic vesicle membrane organization;GO:0071310: cellular response to organic substance;GO:200…	GO:0008021: synaptic vesicle;GO:0030285: integral component of synaptic vesicle membrane;GO:0030672: synaptic vesicle membrane;GO:0031594: neuromuscular junction;GO:0042734: presynaptic membrane;GO:0043005: neuron projection;GO:0043005: neuron projection;GO:0043195: terminal bouton;GO:0048471: perinuclear region of cytoplasm;GO:0048786: presynaptic active zone;GO:0060076: excitatory synapse;GO:00…	GO:0005515: protein binding;GO:0015485: cholesterol binding;GO:0042169: SH2 domain binding;GO:0042802: identical protein binding;GO:0043621: protein self-association
ENSG00000206737|RNVU1-18	40.0988	3.39064	0.866196	3.91441	9.06274e-05	0.00466726
ENSG00000107099|DOCK8	53.3651	2.35124	0.600701	3.91416	9.07201e-05	0.00466726	GO:0001771: immunological synapse formation;GO:0007264: small GTPase mediated signal transduction;GO:0036336: dendritic cell migration;GO:0043547: positive regulation of GTPase activity;GO:0051056: regulation of small GTPase mediated signal transduction;GO:0061485: memory T cell proliferation;GO:0070233: negative regulation of T cell apoptotic process;GO:1903905: positive regulation of establishm…	GO:0005737: cytoplasm;GO:0005829: cytosol;GO:0016020: membrane;GO:0031256: leading edge membrane;GO:0031258: lamellipodium membrane	GO:0005085: guanyl-nucleotide exchange factor activity;GO:0005085: guanyl-nucleotide exchange factor activity;GO:0005515: protein binding
ENSG00000135454|B4GALNT1	1666.4	-1.27448	0.325895	-3.91071	9.20244e-05	0.00471655	GO:0001574: ganglioside biosynthetic process;GO:0001574: ganglioside biosynthetic process;GO:0001574: ganglioside biosynthetic process;GO:0005975: carbohydrate metabolic process;GO:0006687: glycosphingolipid metabolic process;GO:0007283: spermatogenesis;GO:0019915: lipid storage;GO:0030259: lipid glycosylation	GO:0000139: Golgi membrane;GO:0000139: Golgi membrane;GO:0005794: Golgi apparatus;GO:0005886: plasma membrane;GO:0016020: membrane;GO:0030173: integral component of Golgi membrane	GO:0003947: (N-acetylneuraminyl)-galactosylglucosylceramide N-acetylgalactosaminyltransferase activity;GO:0003947: (N-acetylneuraminyl)-galactosylglucosylceramide N-acetylgalactosaminyltransferase activity;GO:0008376: acetylgalactosaminyltransferase activity
ENSG00000186019|AC021092.1	159.654	2.94058	0.752045	3.91012	9.22511e-05	0.00471655
ENSG00000166923|GREM1	9429.36	-1.09625	0.280712	-3.90527	9.41222e-05	0.00479732	GO:0000902: cell morphogenesis;GO:0002042: cell migration involved in sprouting angiogenesis;GO:0002092: positive regulation of receptor internalization;GO:0003257: positive regulation of transcription from RNA polymerase II promoter involved in myocardial precursor cell differentiation;GO:0003337: mesenchymal to epithelial transition involved in metanephros morphogenesis;GO:0006915: apoptotic pr…	GO:0005615: extracellular space;GO:0005615: extracellular space;GO:0009986: cell surface;GO:0062023: collagen-containing extracellular matrix;GO:0062023: collagen-containing extracellular matrix	GO:0005125: cytokine activity;GO:0005515: protein binding;GO:0016015: morphogen activity;GO:0030297: transmembrane receptor protein tyrosine kinase activator activity;GO:0036122: BMP binding;GO:0036122: BMP binding;GO:0036122: BMP binding;GO:0042803: protein homodimerization activity;GO:0043184: vascular endothelial growth factor receptor 2 binding;GO:0048018: receptor ligand activity;GO:0048018:…
ENSG00000154099|DNAAF1	25.6057	3.13219	0.802809	3.90154	9.55815e-05	0.00485666	GO:0001947: heart looping;GO:0003341: cilium movement;GO:0003356: regulation of cilium beat frequency;GO:0030324: lung development;GO:0035469: determination of pancreatic left/right asymmetry;GO:0036158: outer dynein arm assembly;GO:0036159: inner dynein arm assembly;GO:0044458: motile cilium assembly;GO:0060271: cilium assembly;GO:0060271: cilium assembly;GO:0060287: epithelial cilium movement i…	GO:0000922: spindle pole;GO:0005576: extracellular region;GO:0005737: cytoplasm;GO:0005829: cytosol;GO:0005886: plasma membrane;GO:0005930: axoneme;GO:0005930: axoneme;GO:0016607: nuclear speck	GO:0070840: dynein complex binding;GO:0070840: dynein complex binding
ENSG00000142623|PADI1	59.2036	2.29179	0.588187	3.89637	9.76469e-05	0.00494634	GO:0018101: protein citrullination;GO:0036414: histone citrullination	GO:0005634: nucleus;GO:0005654: nucleoplasm;GO:0005737: cytoplasm;GO:0005737: cytoplasm;GO:0005829: cytosol;GO:0005829: cytosol	GO:0004668: protein-arginine deiminase activity;GO:0004668: protein-arginine deiminase activity;GO:0005509: calcium ion binding
ENSG00000128285|MCHR1	259.37	1.36391	0.350325	3.89327	9.89016e-05	0.00497926	GO:0006091: generation of precursor metabolites and energy;GO:0007166: cell surface receptor signaling pathway;GO:0007186: G protein-coupled receptor signaling pathway;GO:0007193: adenylate cyclase-inhibiting G protein-coupled receptor signaling pathway;GO:0007204: positive regulation of cytosolic calcium ion concentration;GO:0007218: neuropeptide signaling pathway;GO:0007631: feeding behavior;GO…	GO:0005886: plasma membrane;GO:0005887: integral component of plasma membrane;GO:0005929: cilium;GO:0043005: neuron projection;GO:0060170: ciliary membrane;GO:0097730: non-motile cilium	GO:0004930: G protein-coupled receptor activity;GO:0005102: signaling receptor binding;GO:0008022: protein C-terminus binding;GO:0008188: neuropeptide receptor activity;GO:0030273: melanin-concentrating hormone receptor activity;GO:0042277: peptide binding;GO:0042562: hormone binding;GO:0042923: neuropeptide binding
ENSG00000125675|GRIA3	400.513	1.36298	0.350052	3.89364	9.8753e-05	0.00497926	GO:0007215: glutamate receptor signaling pathway;GO:0034220: ion transmembrane transport;GO:0035235: ionotropic glutamate receptor signaling pathway	GO:0005886: plasma membrane;GO:0005886: plasma membrane;GO:0030666: endocytic vesicle membrane;GO:0032281: AMPA glutamate receptor complex;GO:0032281: AMPA glutamate receptor complex;GO:0043197: dendritic spine;GO:0045211: postsynaptic membrane	GO:0001540: amyloid-beta binding;GO:0004971: AMPA glutamate receptor activity;GO:0004971: AMPA glutamate receptor activity;GO:0015276: ligand-gated ion channel activity;GO:0038023: signaling receptor activity
ENSG00000137261|KIAA0319	38.9785	2.68543	0.690128	3.8912	9.97502e-05	0.00500667	GO:0001764: neuron migration;GO:0001764: neuron migration;GO:0010996: response to auditory stimulus;GO:0030517: negative regulation of axon extension;GO:0033555: multicellular organismal response to stress;GO:0048692: negative regulation of axon extension involved in regeneration;GO:0060391: positive regulation of SMAD protein signal transduction;GO:0060391: positive regulation of SMAD protein si…	GO:0005769: early endosome;GO:0005886: plasma membrane;GO:0005886: plasma membrane;GO:0005886: plasma membrane;GO:0016021: integral component of membrane;GO:0030669: clathrin-coated endocytic vesicle membrane;GO:0031410: cytoplasmic vesicle;GO:0031901: early endosome membrane;GO:0043231: intracellular membrane-bounded organelle	GO:0005515: protein binding
ENSG00000182179|UBA7	525.016	1.41096	0.362818	3.88889	0.000100703	0.00503913	GO:0006464: cellular protein modification process;GO:0006974: cellular response to DNA damage stimulus;GO:0016567: protein ubiquitination;GO:0019941: modification-dependent protein catabolic process;GO:0032020: ISG15-protein conjugation;GO:0032020: ISG15-protein conjugation;GO:0032446: protein modification by small protein conjugation	GO:0005634: nucleus;GO:0005654: nucleoplasm;GO:0005737: cytoplasm;GO:0005829: cytosol	GO:0004842: ubiquitin-protein transferase activity;GO:0005515: protein binding;GO:0005524: ATP binding;GO:0019782: ISG15 activating enzyme activity;GO:0019782: ISG15 activating enzyme activity
ENSG00000167680|SEMA6B	56.9563	2.29917	0.59199	3.8838	0.000102836	0.00510932	GO:0001755: neural crest cell migration;GO:0007411: axon guidance;GO:0007411: axon guidance;GO:0007417: central nervous system development;GO:0021766: hippocampus development;GO:0030335: positive regulation of cell migration;GO:0048843: negative regulation of axon extension involved in axon guidance;GO:0050919: negative chemotaxis;GO:0071526: semaphorin-plexin signaling pathway	GO:0005615: extracellular space;GO:0005887: integral component of plasma membrane	GO:0005515: protein binding;GO:0030215: semaphorin receptor binding;GO:0045499: chemorepellent activity
ENSG00000251201|TMED7-TICAM2	479.42	-1.42633	0.367213	-3.88421	0.000102665	0.00510932
ENSG00000157168|NRG1	2067.23	-1.14333	0.294421	-3.88333	0.000103037	0.00510932	GO:0000165: MAPK cascade;GO:0000902: cell morphogenesis;GO:0003161: cardiac conduction system development;GO:0003222: ventricular trabecula myocardium morphogenesis;GO:0007154: cell communication;GO:0007171: activation of transmembrane receptor protein tyrosine kinase activity;GO:0007399: nervous system development;GO:0007399: nervous system development;GO:0007416: synapse assembly;GO:0007626: lo…	GO:0005576: extracellular region;GO:0005576: extracellular region;GO:0005615: extracellular space;GO:0005654: nucleoplasm;GO:0005737: cytoplasm;GO:0005887: integral component of plasma membrane;GO:0016020: membrane;GO:0030424: axon;GO:0031594: neuromuscular junction;GO:0098978: glutamatergic synapse;GO:0098982: GABA-ergic synapse	GO:0003712: transcription coregulator activity;GO:0005102: signaling receptor binding;GO:0005125: cytokine activity;GO:0005176: ErbB-2 class receptor binding;GO:0005178: integrin binding;GO:0008083: growth factor activity;GO:0030296: protein tyrosine kinase activator activity;GO:0030297: transmembrane receptor protein tyrosine kinase activator activity;GO:0030971: receptor tyrosine kinase binding…
ENSG00000144834|TAGLN3	1145.65	-1.14495	0.295477	-3.87492	0.000106659	0.00527304	GO:0000122: negative regulation of transcription by RNA polymerase II;GO:0007417: central nervous system development	GO:0005634: nucleus;GO:0005856: cytoskeleton
ENSG00000172380|GNG12	2592.22	-1.14016	0.294886	-3.86643	0.000110439	0.00542705	GO:0007165: signal transduction;GO:0007186: G protein-coupled receptor signaling pathway;GO:0021987: cerebral cortex development;GO:0032496: response to lipopolysaccharide	GO:0005834: heterotrimeric G-protein complex;GO:0005884: actin filament;GO:0005886: plasma membrane;GO:0070062: extracellular exosome	GO:0005515: protein binding;GO:0030165: PDZ domain binding;GO:0031681: G-protein beta-subunit binding;GO:0042301: phosphate ion binding
ENSG00000104899|AMH	112.062	1.79018	0.462945	3.86693	0.000110212	0.00542705	GO:0001546: preantral ovarian follicle growth;GO:0001655: urogenital system development;GO:0001880: Mullerian duct regression;GO:0001880: Mullerian duct regression;GO:0001880: Mullerian duct regression;GO:0007165: signal transduction;GO:0007267: cell-cell signaling;GO:0007506: gonadal mesoderm development;GO:0007530: sex determination;GO:0007548: sex differentiation;GO:0007568: aging;GO:0009410: …	GO:0005576: extracellular region;GO:0005576: extracellular region;GO:0005615: extracellular space	GO:0005102: signaling receptor binding;GO:0005160: transforming growth factor beta receptor binding;GO:0005179: hormone activity;GO:0008083: growth factor activity
ENSG00000083857|FAT1	4323.74	-2.02367	0.52349	-3.86572	0.000110763	0.00542705	GO:0002088: lens development in camera-type eye;GO:0003382: epithelial cell morphogenesis;GO:0003412: establishment of epithelial cell apical/basal polarity involved in camera-type eye morphogenesis;GO:0007015: actin filament organization;GO:0007155: cell adhesion;GO:0007156: homophilic cell adhesion via plasma membrane adhesion molecules;GO:0007163: establishment or maintenance of cell polarity;…	GO:0005634: nucleus;GO:0005886: plasma membrane;GO:0005887: integral component of plasma membrane;GO:0005911: cell-cell junction;GO:0005925: focal adhesion;GO:0016324: apical plasma membrane;GO:0030027: lamellipodium;GO:0030175: filopodium;GO:0048471: perinuclear region of cytoplasm;GO:0070062: extracellular exosome	GO:0005509: calcium ion binding;GO:0005515: protein binding
ENSG00000140527|WDR93	39.4024	2.50393	0.648369	3.8619	0.000112509	0.00549626	GO:0022900: electron transport chain	GO:0005747: mitochondrial respiratory chain complex I	GO:0016651: oxidoreductase activity, acting on NAD(P)H
ENSG00000256061|DNAAF4	1670.06	1.26389	0.327565	3.85843	0.000114116	0.00555826	GO:0001764: neuron migration;GO:0003341: cilium movement;GO:0003341: cilium movement;GO:0003351: epithelial cilium movement involved in extracellular fluid movement;GO:0007368: determination of left/right symmetry;GO:0007368: determination of left/right symmetry;GO:0007507: heart development;GO:0033146: regulation of intracellular estrogen receptor signaling pathway;GO:0036158: outer dynein arm a…	GO:0005576: extracellular region;GO:0005634: nucleus;GO:0005737: cytoplasm;GO:0005813: centrosome;GO:0005829: cytosol;GO:0005886: plasma membrane;GO:0043005: neuron projection;GO:0097730: non-motile cilium;GO:0120293: dynein axonemal particle	GO:0005515: protein binding;GO:0030331: estrogen receptor binding;GO:0030331: estrogen receptor binding
ENSG00000175793|SFN	111.355	1.78051	0.461571	3.85749	0.000114556	0.00555984	GO:0000079: regulation of cyclin-dependent protein serine/threonine kinase activity;GO:0001836: release of cytochrome c from mitochondria;GO:0003334: keratinocyte development;GO:0006469: negative regulation of protein kinase activity;GO:0007165: signal transduction;GO:0007165: signal transduction;GO:0008630: intrinsic apoptotic signaling pathway in response to DNA damage;GO:0010482: regulation of…	GO:0005615: extracellular space;GO:0005634: nucleus;GO:0005737: cytoplasm;GO:0005829: cytosol;GO:0005829: cytosol;GO:0070062: extracellular exosome	GO:0005515: protein binding;GO:0008426: protein kinase C inhibitor activity;GO:0019901: protein kinase binding;GO:0019901: protein kinase binding;GO:0042802: identical protein binding;GO:0045296: cadherin binding;GO:0051219: phosphoprotein binding
ENSG00000108813|DLX4	66.6492	2.03095	0.526572	3.85692	0.000114824	0.00555984	GO:0000122: negative regulation of transcription by RNA polymerase II;GO:0000122: negative regulation of transcription by RNA polymerase II;GO:0006355: regulation of transcription, DNA-templated;GO:0006357: regulation of transcription by RNA polymerase II;GO:0009790: embryo development;GO:0030154: cell differentiation	GO:0000785: chromatin;GO:0005634: nucleus;GO:0005654: nucleoplasm	GO:0000978: RNA polymerase II cis-regulatory region sequence-specific DNA binding;GO:0000978: RNA polymerase II cis-regulatory region sequence-specific DNA binding;GO:0000981: DNA-binding transcription factor activity, RNA polymerase II-specific;GO:0000981: DNA-binding transcription factor activity, RNA polymerase II-specific;GO:0001227: DNA-binding transcription repressor activity, RNA polymeras…
ENSG00000167476|JSRP1	99.1613	1.74858	0.454059	3.85099	0.000117641	0.00566292	GO:0003009: skeletal muscle contraction;GO:0003009: skeletal muscle contraction;GO:0060314: regulation of ryanodine-sensitive calcium-release channel activity	GO:0016529: sarcoplasmic reticulum;GO:0033017: sarcoplasmic reticulum membrane	GO:0005515: protein binding
ENSG00000280614|FP236383.4	224611	4.42986	1.15014	3.85159	0.000117355	0.00566292
ENSG00000262227|AC004771.2	114.531	-2.10684	0.547959	-3.84489	0.000120606	0.00577192
ENSG00000091592|NLRP1	1278	1.12874	0.293564	3.84494	0.000120582	0.00577192	GO:0006915: apoptotic process;GO:0006919: activation of cysteine-type endopeptidase activity involved in apoptotic process;GO:0006919: activation of cysteine-type endopeptidase activity involved in apoptotic process;GO:0006919: activation of cysteine-type endopeptidase activity involved in apoptotic process;GO:0006954: inflammatory response;GO:0032495: response to muramyl dipeptide;GO:0032731: po…	GO:0005634: nucleus;GO:0005654: nucleoplasm;GO:0005829: cytosol;GO:0005829: cytosol;GO:0061702: inflammasome complex;GO:0072558: NLRP1 inflammasome complex;GO:0072558: NLRP1 inflammasome complex	GO:0003690: double-stranded DNA binding;GO:0003725: double-stranded RNA binding;GO:0005515: protein binding;GO:0005524: ATP binding;GO:0008233: peptidase activity;GO:0008656: cysteine-type endopeptidase activator activity involved in apoptotic process;GO:0016887: ATP hydrolysis activity;GO:0019899: enzyme binding;GO:0019904: protein domain specific binding;GO:0043621: protein self-association;GO:…
ENSG00000151790|TDO2	455.482	1.43041	0.37236	3.84147	0.000122301	0.00581918	GO:0019441: tryptophan catabolic process to kynurenine;GO:0019441: tryptophan catabolic process to kynurenine;GO:0019442: tryptophan catabolic process to acetyl-CoA;GO:0051289: protein homotetramerization;GO:1904842: response to nitroglycerin	GO:0005829: cytosol	GO:0004833: tryptophan 2,3-dioxygenase activity;GO:0004833: tryptophan 2,3-dioxygenase activity;GO:0005515: protein binding;GO:0016597: amino acid binding;GO:0019825: oxygen binding;GO:0020037: heme binding;GO:0020037: heme binding;GO:0042802: identical protein binding;GO:0046872: metal ion binding
ENSG00000008513|ST3GAL1	7167.21	-1.21748	0.316922	-3.84158	0.000122246	0.00581918	GO:0002319: memory B cell differentiation;GO:0006054: N-acetylneuraminate metabolic process;GO:0006464: cellular protein modification process;GO:0006468: protein phosphorylation;GO:0006487: protein N-linked glycosylation;GO:0010706: ganglioside biosynthetic process via lactosylceramide;GO:0016266: O-glycan processing;GO:0018146: keratan sulfate biosynthetic process;GO:0019082: viral protein proce…	GO:0000139: Golgi membrane;GO:0016020: membrane;GO:0016021: integral component of membrane;GO:0032588: trans-Golgi network membrane;GO:0070062: extracellular exosome;GO:1990675: Golgi medial cisterna membrane;GO:1990676: Golgi trans cisterna membrane	GO:0003836: beta-galactoside (CMP) alpha-2,3-sialyltransferase activity;GO:0003836: beta-galactoside (CMP) alpha-2,3-sialyltransferase activity;GO:0003836: beta-galactoside (CMP) alpha-2,3-sialyltransferase activity;GO:0003836: beta-galactoside (CMP) alpha-2,3-sialyltransferase activity;GO:0008373: sialyltransferase activity;GO:0047288: monosialoganglioside sialyltransferase activity
ENSG00000110031|LPXN	777.454	-1.14933	0.299492	-3.83761	0.000124236	0.00589422	GO:0006355: regulation of transcription, DNA-templated;GO:0007155: cell adhesion;GO:0007162: negative regulation of cell adhesion;GO:0007165: signal transduction;GO:0007179: transforming growth factor beta receptor signaling pathway;GO:0033628: regulation of cell adhesion mediated by integrin;GO:0034446: substrate adhesion-dependent cell spreading;GO:0043542: endothelial cell migration;GO:0050859…	GO:0002102: podosome;GO:0005634: nucleus;GO:0005737: cytoplasm;GO:0005829: cytosol;GO:0005829: cytosol;GO:0005886: plasma membrane;GO:0005886: plasma membrane;GO:0005925: focal adhesion;GO:0005925: focal adhesion;GO:0016020: membrane;GO:0016607: nuclear speck;GO:0042995: cell projection;GO:0048471: perinuclear region of cytoplasm	GO:0003712: transcription coregulator activity;GO:0003712: transcription coregulator activity;GO:0005515: protein binding;GO:0046872: metal ion binding
ENSG00000261033|AC005730.2	90.5725	1.75008	0.456866	3.83062	0.000127821	0.00604691
ENSG00000117115|PADI2	37.5785	2.48895	0.651634	3.81955	0.000133696	0.00625293	GO:0010848: regulation of chromatin disassembly;GO:0018101: protein citrullination;GO:0021762: substantia nigra development;GO:0030520: intracellular estrogen receptor signaling pathway;GO:0036413: histone H3-R26 citrullination;GO:0036414: histone citrullination;GO:0045815: epigenetic maintenance of chromatin in transcription-competent conformation;GO:0070100: negative regulation of chemokine-med…	GO:0005576: extracellular region;GO:0005634: nucleus;GO:0005737: cytoplasm;GO:0005737: cytoplasm;GO:0005829: cytosol;GO:0035327: transcriptionally active chromatin;GO:0035578: azurophil granule lumen;GO:0070062: extracellular exosome	GO:0004668: protein-arginine deiminase activity;GO:0004668: protein-arginine deiminase activity;GO:0005509: calcium ion binding;GO:0030331: estrogen receptor binding;GO:0042803: protein homodimerization activity
ENSG00000215483|LINC00598	99.4674	2.27567	0.595759	3.81978	0.000133571	0.00625293
ENSG00000198417|MT1F	157.483	1.79812	0.470552	3.82131	0.000132745	0.00625293	GO:0006882: cellular zinc ion homeostasis;GO:0010273: detoxification of copper ion;GO:0045926: negative regulation of growth;GO:0071276: cellular response to cadmium ion;GO:0071276: cellular response to cadmium ion;GO:0071280: cellular response to copper ion;GO:0071294: cellular response to zinc ion;GO:0071294: cellular response to zinc ion	GO:0005634: nucleus;GO:0005634: nucleus;GO:0005737: cytoplasm;GO:0005737: cytoplasm	GO:0005515: protein binding;GO:0008270: zinc ion binding;GO:0046872: metal ion binding
ENSG00000180573|H2AC6	520.963	1.23766	0.323926	3.82082	0.000133011	0.00625293	GO:0008285: negative regulation of cell population proliferation;GO:0031507: heterochromatin assembly	GO:0000786: nucleosome;GO:0005634: nucleus;GO:0005634: nucleus;GO:0005654: nucleoplasm;GO:0070062: extracellular exosome	GO:0003674: molecular_function;GO:0003677: DNA binding;GO:0005515: protein binding;GO:0046982: protein heterodimerization activity
ENSG00000186409|CCDC30	336.369	1.30338	0.34177	3.8136	0.000136955	0.00636696
ENSG00000110092|CCND1	20516.2	-1.04817	0.27504	-3.81096	0.000138427	0.00636696	GO:0000079: regulation of cyclin-dependent protein serine/threonine kinase activity;GO:0000082: G1/S transition of mitotic cell cycle;GO:0000082: G1/S transition of mitotic cell cycle;GO:0000122: negative regulation of transcription by RNA polymerase II;GO:0000320: re-entry into mitotic cell cycle;GO:0001934: positive regulation of protein phosphorylation;GO:0006468: protein phosphorylation;GO:00…	GO:0000307: cyclin-dependent protein kinase holoenzyme complex;GO:0000307: cyclin-dependent protein kinase holoenzyme complex;GO:0005634: nucleus;GO:0005634: nucleus;GO:0005654: nucleoplasm;GO:0005654: nucleoplasm;GO:0005737: cytoplasm;GO:0005829: cytosol;GO:0005923: bicellular tight junction;GO:0017053: transcription repressor complex;GO:0031965: nuclear membrane	GO:0003714: transcription corepressor activity;GO:0004672: protein kinase activity;GO:0005515: protein binding;GO:0008134: transcription factor binding;GO:0016538: cyclin-dependent protein serine/threonine kinase regulator activity;GO:0019899: enzyme binding;GO:0019901: protein kinase binding;GO:0042826: histone deacetylase binding;GO:0044877: protein-containing complex binding;GO:0070064: prolin…
ENSG00000074527|NTN4	98.9925	-1.76112	0.462067	-3.8114	0.000138184	0.00636696	GO:0009887: animal organ morphogenesis;GO:0009888: tissue development;GO:0016322: neuron remodeling;GO:0016477: cell migration;GO:0034446: substrate adhesion-dependent cell spreading;GO:0060668: regulation of branching involved in salivary gland morphogenesis by extracellular matrix-epithelial cell signaling;GO:0070831: basement membrane assembly	GO:0005576: extracellular region;GO:0005886: plasma membrane;GO:0043256: laminin complex	GO:0005515: protein binding;GO:0043237: laminin-1 binding
ENSG00000259522|AL136295.4	401.235	-1.9863	0.521131	-3.81153	0.000138112	0.00636696
ENSG00000266714|MYO15B	36.1388	2.77726	0.7287	3.81125	0.000138264	0.00636696
ENSG00000254363|AC011379.2	56.9913	2.37719	0.623786	3.81091	0.000138454	0.00636696
ENSG00000269352|PTOV1-AS2	161.088	1.53458	0.403015	3.80775	0.000140235	0.00641916
ENSG00000104722|NEFM	161.546	1.76359	0.463187	3.80752	0.000140369	0.00641916	GO:0033693: neurofilament bundle assembly	GO:0005883: neurofilament;GO:0030424: axon;GO:0045111: intermediate filament cytoskeleton;GO:0097418: neurofibrillary tangle	GO:0005200: structural constituent of cytoskeleton;GO:0005515: protein binding;GO:0008017: microtubule binding
ENSG00000127152|BCL11B	199.11	-1.63439	0.429571	-3.80471	0.000141971	0.00647442	GO:0003334: keratinocyte development;GO:0003382: epithelial cell morphogenesis;GO:0006357: regulation of transcription by RNA polymerase II;GO:0008285: negative regulation of cell population proliferation;GO:0010837: regulation of keratinocyte proliferation;GO:0019216: regulation of lipid metabolic process;GO:0021773: striatal medium spiny neuron differentiation;GO:0021902: commitment of neuronal…	GO:0005634: nucleus;GO:0043005: neuron projection	GO:0000978: RNA polymerase II cis-regulatory region sequence-specific DNA binding;GO:0001228: DNA-binding transcription activator activity, RNA polymerase II-specific;GO:0003700: DNA-binding transcription factor activity;GO:0005515: protein binding;GO:0046872: metal ion binding;GO:1990837: sequence-specific double-stranded DNA binding
ENSG00000187634|SAMD11	2820.11	1.09287	0.287408	3.80251	0.000143236	0.00651408	GO:0045892: negative regulation of transcription, DNA-templated	GO:0005634: nucleus	GO:0003682: chromatin binding;GO:0005515: protein binding;GO:0042393: histone binding
ENSG00000260669|AL096870.2	461.08	1.47037	0.386989	3.79952	0.000144978	0.00657512
ENSG00000099337|KCNK6	224.554	1.36704	0.359912	3.79826	0.000145714	0.00659034	GO:0003085: negative regulation of systemic arterial blood pressure;GO:0006813: potassium ion transport;GO:0030322: stabilization of membrane potential;GO:0034765: regulation of ion transmembrane transport;GO:0060075: regulation of resting membrane potential;GO:0071805: potassium ion transmembrane transport	GO:0005886: plasma membrane;GO:0005887: integral component of plasma membrane;GO:0008076: voltage-gated potassium channel complex	GO:0005242: inward rectifier potassium channel activity;GO:0022841: potassium ion leak channel activity
ENSG00000268621|IGFL2-AS1	34.4511	2.62567	0.692524	3.79145	0.000149768	0.00675516
ENSG00000137936|BCAR3	459.688	-1.25173	0.330268	-3.79005	0.000150619	0.00677498	GO:0002089: lens morphogenesis in camera-type eye;GO:0007165: signal transduction;GO:0007264: small GTPase mediated signal transduction;GO:0008286: insulin receptor signaling pathway;GO:0009410: response to xenobiotic stimulus;GO:0033138: positive regulation of peptidyl-serine phosphorylation;GO:0043410: positive regulation of MAPK cascade;GO:0043547: positive regulation of GTPase activity;GO:004…	GO:0005737: cytoplasm;GO:0005925: focal adhesion;GO:0016020: membrane	GO:0001784: phosphotyrosine residue binding;GO:0005085: guanyl-nucleotide exchange factor activity;GO:0005515: protein binding;GO:0019900: kinase binding
ENSG00000248712|CCDC153	49.0679	2.20619	0.582704	3.78613	0.000153012	0.00686384			GO:0005515: protein binding
ENSG00000176485|PLAAT3	1541.94	1.20962	0.320064	3.7793	0.000157272	0.00699777	GO:0006641: triglyceride metabolic process;GO:0006644: phospholipid metabolic process;GO:0007031: peroxisome organization;GO:0008654: phospholipid biosynthetic process;GO:0009617: response to bacterium;GO:0016042: lipid catabolic process;GO:0030397: membrane disassembly;GO:0036152: phosphatidylethanolamine acyl-chain remodeling;GO:0045786: negative regulation of cell cycle;GO:0046485: ether lipid…	GO:0005575: cellular_component;GO:0005635: nuclear envelope;GO:0005737: cytoplasm;GO:0005739: mitochondrion;GO:0005764: lysosome;GO:0005777: peroxisome;GO:0005778: peroxisomal membrane;GO:0005783: endoplasmic reticulum;GO:0005829: cytosol;GO:0005829: cytosol;GO:0005886: plasma membrane;GO:0016021: integral component of membrane;GO:0048471: perinuclear region of cytoplasm	GO:0004623: phospholipase A2 activity;GO:0004623: phospholipase A2 activity;GO:0004623: phospholipase A2 activity;GO:0005515: protein binding;GO:0008970: phospholipase A1 activity;GO:0008970: phospholipase A1 activity;GO:0016410: N-acyltransferase activity;GO:0016410: N-acyltransferase activity;GO:0016746: acyltransferase activity;GO:0052739: phosphatidylserine 1-acylhydrolase activity;GO:0052740…
ENSG00000215386|MIR99AHG	792.064	1.18771	0.314199	3.78012	0.000156751	0.00699777
ENSG00000254741|AC067930.1	34.3617	4.21685	1.11563	3.77977	0.000156971	0.00699777
ENSG00000167995|BEST1	2069.13	2.29262	0.606943	3.77732	0.000158526	0.00703453	GO:0006821: chloride transport;GO:0007601: visual perception;GO:0015701: bicarbonate transport;GO:0030321: transepithelial chloride transport;GO:0034220: ion transmembrane transport;GO:0050908: detection of light stimulus involved in visual perception;GO:0051924: regulation of calcium ion transport;GO:1902476: chloride transmembrane transport	GO:0005829: cytosol;GO:0005886: plasma membrane;GO:0009925: basal plasma membrane;GO:0016020: membrane;GO:0016021: integral component of membrane;GO:0016323: basolateral plasma membrane;GO:0034707: chloride channel complex	GO:0005229: intracellular calcium activated chloride channel activity;GO:0005254: chloride channel activity;GO:0005254: chloride channel activity;GO:0015106: bicarbonate transmembrane transporter activity;GO:0042802: identical protein binding
ENSG00000111816|FRK	129.701	1.70681	0.452211	3.77438	0.000160409	0.00709897	GO:0000122: negative regulation of transcription by RNA polymerase II;GO:0006468: protein phosphorylation;GO:0007169: transmembrane receptor protein tyrosine kinase signaling pathway;GO:0008285: negative regulation of cell population proliferation;GO:0018108: peptidyl-tyrosine phosphorylation;GO:0030154: cell differentiation;GO:0045087: innate immune response	GO:0005576: extracellular region;GO:0005622: intracellular anatomical structure;GO:0005634: nucleus;GO:0005654: nucleoplasm;GO:0005829: cytosol;GO:0005829: cytosol;GO:0031234: extrinsic component of cytoplasmic side of plasma membrane;GO:0035578: azurophil granule lumen;GO:0035580: specific granule lumen;GO:0070062: extracellular exosome	GO:0004713: protein tyrosine kinase activity;GO:0004713: protein tyrosine kinase activity;GO:0004714: transmembrane receptor protein tyrosine kinase activity;GO:0004715: non-membrane spanning protein tyrosine kinase activity;GO:0005102: signaling receptor binding;GO:0005515: protein binding;GO:0005524: ATP binding
ENSG00000255031|AP002807.1	639.148	1.14886	0.304573	3.77203	0.000161927	0.00714524
ENSG00000127184|COX7C	31646.5	1.26309	0.33491	3.77142	0.000162323	0.00714524	GO:0006091: generation of precursor metabolites and energy;GO:0006123: mitochondrial electron transport, cytochrome c to oxygen	GO:0005739: mitochondrion;GO:0005743: mitochondrial inner membrane;GO:0005751: mitochondrial respiratory chain complex IV;GO:0016021: integral component of membrane	GO:0005515: protein binding
ENSG00000254122|PCDHGB7	103.944	-3.246	0.861908	-3.76606	0.000165844	0.00728078	GO:0007155: cell adhesion;GO:0007156: homophilic cell adhesion via plasma membrane adhesion molecules	GO:0005887: integral component of plasma membrane	GO:0005509: calcium ion binding
ENSG00000138030|KHK	250.165	1.32781	0.353544	3.75572	0.000172846	0.00756799	GO:0006000: fructose metabolic process;GO:0006000: fructose metabolic process;GO:0009744: response to sucrose;GO:0009749: response to glucose;GO:0009750: response to fructose;GO:0010043: response to zinc ion;GO:0032868: response to insulin;GO:0046835: carbohydrate phosphorylation;GO:0070873: regulation of glycogen metabolic process	GO:0005737: cytoplasm;GO:0005737: cytoplasm;GO:0005829: cytosol;GO:0070062: extracellular exosome	GO:0004454: ketohexokinase activity;GO:0004454: ketohexokinase activity;GO:0005515: protein binding;GO:0005524: ATP binding
ENSG00000133216|EPHB2	3425.94	-1.09077	0.290607	-3.75341	0.000174442	0.0076176	GO:0001525: angiogenesis;GO:0001525: angiogenesis;GO:0001655: urogenital system development;GO:0001933: negative regulation of protein phosphorylation;GO:0002639: positive regulation of immunoglobulin production;GO:0006469: negative regulation of protein kinase activity;GO:0007162: negative regulation of cell adhesion;GO:0007169: transmembrane receptor protein tyrosine kinase signaling pathway;GO…	GO:0005576: extracellular region;GO:0005654: nucleoplasm;GO:0005829: cytosol;GO:0005886: plasma membrane;GO:0005886: plasma membrane;GO:0005887: integral component of plasma membrane;GO:0005887: integral component of plasma membrane;GO:0030424: axon;GO:0030425: dendrite;GO:0043005: neuron projection;GO:0043025: neuronal cell body;GO:0043235: receptor complex;GO:0098794: postsynapse;GO:0098978: gl…	GO:0001540: amyloid-beta binding;GO:0001540: amyloid-beta binding;GO:0004713: protein tyrosine kinase activity;GO:0004714: transmembrane receptor protein tyrosine kinase activity;GO:0005005: transmembrane-ephrin receptor activity;GO:0005005: transmembrane-ephrin receptor activity;GO:0005005: transmembrane-ephrin receptor activity;GO:0005102: signaling receptor binding;GO:0005515: protein binding;…
ENSG00000118997|DNAH7	156.372	1.47723	0.394043	3.7489	0.000177613	0.00773558	GO:0003341: cilium movement;GO:0003341: cilium movement;GO:0007018: microtubule-based movement;GO:0036159: inner dynein arm assembly;GO:0060285: cilium-dependent cell motility	GO:0005829: cytosol;GO:0005858: axonemal dynein complex;GO:0005874: microtubule;GO:0005929: cilium;GO:0030286: dynein complex;GO:0036156: inner dynein arm;GO:0036156: inner dynein arm	GO:0003777: microtubule motor activity;GO:0003777: microtubule motor activity;GO:0005509: calcium ion binding;GO:0005524: ATP binding;GO:0008569: minus-end-directed microtubule motor activity;GO:0045505: dynein intermediate chain binding;GO:0051959: dynein light intermediate chain binding
ENSG00000110675|ELMOD1	301.391	-1.30386	0.348279	-3.74373	0.000181307	0.00787563	GO:0043547: positive regulation of GTPase activity		GO:0005096: GTPase activator activity;GO:0005096: GTPase activator activity
ENSG00000155792|DEPTOR	280.607	1.3421	0.358632	3.74227	0.000182362	0.00790059	GO:0006469: negative regulation of protein kinase activity;GO:0032007: negative regulation of TOR signaling;GO:0035556: intracellular signal transduction;GO:0045792: negative regulation of cell size;GO:1903940: negative regulation of TORC2 signaling;GO:1904262: negative regulation of TORC1 signaling;GO:2001236: regulation of extrinsic apoptotic signaling pathway		GO:0005515: protein binding
ENSG00000203852|H3C15	28.6098	2.84283	0.761532	3.73305	0.000189176	0.00817429	GO:0006334: nucleosome assembly	GO:0000786: nucleosome;GO:0005576: extracellular region;GO:0005634: nucleus;GO:0005634: nucleus;GO:0005634: nucleus;GO:0005654: nucleoplasm;GO:0070062: extracellular exosome	GO:0003677: DNA binding;GO:0005515: protein binding;GO:0046982: protein heterodimerization activity
ENSG00000203814|H2BC18	37.315	2.67929	0.718117	3.731	0.000190721	0.00821946	GO:0006334: nucleosome assembly	GO:0000786: nucleosome;GO:0005634: nucleus;GO:0005654: nucleoplasm;GO:0005654: nucleoplasm;GO:0005829: cytosol;GO:0070062: extracellular exosome	GO:0003674: molecular_function;GO:0003677: DNA binding;GO:0046982: protein heterodimerization activity
ENSG00000118257|NRP2	18668.8	-1.45636	0.390621	-3.72831	0.000192766	0.00828591	GO:0001525: angiogenesis;GO:0001938: positive regulation of endothelial cell proliferation;GO:0003148: outflow tract septum morphogenesis;GO:0007155: cell adhesion;GO:0007411: axon guidance;GO:0010595: positive regulation of endothelial cell migration;GO:0021612: facial nerve structural organization;GO:0021649: vestibulocochlear nerve structural organization;GO:0021675: nerve development;GO:00218…	GO:0002116: semaphorin receptor complex;GO:0005576: extracellular region;GO:0005886: plasma membrane;GO:0016020: membrane;GO:0016021: integral component of membrane;GO:0030424: axon;GO:0098978: glutamatergic synapse;GO:0099055: integral component of postsynaptic membrane	GO:0005021: vascular endothelial growth factor-activated receptor activity;GO:0005515: protein binding;GO:0008201: heparin binding;GO:0017154: semaphorin receptor activity;GO:0019838: growth factor binding;GO:0019955: cytokine binding;GO:0038023: signaling receptor activity;GO:0046872: metal ion binding
ENSG00000061656|SPAG4	1013.31	1.20045	0.322251	3.72521	0.000195152	0.00836661	GO:0006998: nuclear envelope organization;GO:0007283: spermatogenesis;GO:0030154: cell differentiation	GO:0005635: nuclear envelope;GO:0005639: integral component of nuclear inner membrane;GO:0005737: cytoplasm;GO:0005856: cytoskeleton;GO:0031514: motile cilium;GO:0034993: meiotic nuclear membrane microtubule tethering complex	GO:0005198: structural molecule activity;GO:0005515: protein binding;GO:0043495: protein-membrane adaptor activity
ENSG00000166816|LDHD	120.986	1.63183	0.438857	3.71837	0.000200515	0.00857421	GO:1903457: lactate catabolic process;GO:1903457: lactate catabolic process	GO:0005739: mitochondrion;GO:0005739: mitochondrion;GO:0005743: mitochondrial inner membrane	GO:0004458: D-lactate dehydrogenase (cytochrome) activity;GO:0005515: protein binding;GO:0008720: D-lactate dehydrogenase activity;GO:0050660: flavin adenine dinucleotide binding;GO:0071949: FAD binding
ENSG00000081277|PKP1	75.9717	1.90943	0.514421	3.7118	0.000205793	0.00877714	GO:0007043: cell-cell junction assembly;GO:0007155: cell adhesion;GO:0007165: signal transduction;GO:0010628: positive regulation of gene expression;GO:0045110: intermediate filament bundle assembly;GO:0045110: intermediate filament bundle assembly;GO:0098609: cell-cell adhesion;GO:1902373: negative regulation of mRNA catabolic process	GO:0001533: cornified envelope;GO:0005634: nucleus;GO:0005634: nucleus;GO:0005654: nucleoplasm;GO:0005737: cytoplasm;GO:0005882: intermediate filament;GO:0005886: plasma membrane;GO:0005886: plasma membrane;GO:0005886: plasma membrane;GO:0005912: adherens junction;GO:0030057: desmosome;GO:0101003: ficolin-1-rich granule membrane;GO:1990124: messenger ribonucleoprotein complex	GO:0005515: protein binding;GO:0005521: lamin binding;GO:0019215: intermediate filament binding;GO:0030280: structural constituent of skin epidermis;GO:0045296: cadherin binding
ENSG00000124575|H1-3	23.9986	3.16858	0.85528	3.70473	0.000211614	0.00898708	GO:0006334: nucleosome assembly;GO:0016584: nucleosome positioning;GO:0030261: chromosome condensation;GO:0045910: negative regulation of DNA recombination	GO:0000785: chromatin;GO:0000786: nucleosome;GO:0000791: euchromatin;GO:0005634: nucleus	GO:0003690: double-stranded DNA binding;GO:0003723: RNA binding;GO:0031490: chromatin DNA binding;GO:0031492: nucleosomal DNA binding
ENSG00000120149|MSX2	20.5868	3.43226	0.92651	3.7045	0.000211807	0.00898708	GO:0000122: negative regulation of transcription by RNA polymerase II;GO:0000122: negative regulation of transcription by RNA polymerase II;GO:0001649: osteoblast differentiation;GO:0003161: cardiac conduction system development;GO:0006357: regulation of transcription by RNA polymerase II;GO:0045892: negative regulation of transcription, DNA-templated;GO:0048598: embryonic morphogenesis;GO:006036…	GO:0000785: chromatin;GO:0005634: nucleus;GO:0005829: cytosol;GO:0016607: nuclear speck	GO:0000976: transcription cis-regulatory region binding;GO:0000977: RNA polymerase II transcription regulatory region sequence-specific DNA binding;GO:0000981: DNA-binding transcription factor activity, RNA polymerase II-specific;GO:0000981: DNA-binding transcription factor activity, RNA polymerase II-specific;GO:0000981: DNA-binding transcription factor activity, RNA polymerase II-specific;GO:00…
ENSG00000236499|LINC00896	18.3034	3.69798	0.998612	3.70311	0.000212969	0.00901313
ENSG00000132692|BCAN	103.493	2.10963	0.570189	3.69988	0.0002157	0.00910531	GO:0001501: skeletal system development;GO:0007155: cell adhesion;GO:0007417: central nervous system development;GO:0021766: hippocampus development;GO:0060074: synapse maturation	GO:0005576: extracellular region;GO:0005796: Golgi lumen;GO:0031012: extracellular matrix;GO:0031225: anchored component of membrane;GO:0043202: lysosomal lumen;GO:0098978: glutamatergic synapse	GO:0005515: protein binding;GO:0005540: hyaluronic acid binding;GO:0030246: carbohydrate binding
ENSG00000146374|RSPO3	804.878	-1.14402	0.309403	-3.69752	0.000217717	0.00916695	GO:0001974: blood vessel remodeling;GO:0002040: sprouting angiogenesis;GO:0016055: Wnt signaling pathway;GO:0030177: positive regulation of Wnt signaling pathway;GO:0030177: positive regulation of Wnt signaling pathway;GO:0060670: branching involved in labyrinthine layer morphogenesis;GO:0090263: positive regulation of canonical Wnt signaling pathway;GO:2000052: positive regulation of non-canonic…	GO:0005576: extracellular region;GO:0005576: extracellular region	GO:0005102: signaling receptor binding;GO:0005109: frizzled binding;GO:0008201: heparin binding
ENSG00000261040|WFDC21P	577.59	1.40462	0.380101	3.69539	0.000219548	0.00922045
ENSG00000165424|ZCCHC24	1186.44	-1.17102	0.317211	-3.6916	0.000222849	0.00926945			GO:0003723: RNA binding;GO:0008270: zinc ion binding
ENSG00000110665|C11orf21	33.1224	2.79915	0.75809	3.69238	0.000222169	0.00926945		GO:0005737: cytoplasm
ENSG00000140022|STON2	403.097	1.19802	0.324524	3.69162	0.000222832	0.00926945	GO:0016192: vesicle-mediated transport;GO:0030100: regulation of endocytosis;GO:0030100: regulation of endocytosis;GO:0048488: synaptic vesicle endocytosis;GO:0048488: synaptic vesicle endocytosis	GO:0005730: nucleolus;GO:0005829: cytosol;GO:0005829: cytosol;GO:0008021: synaptic vesicle;GO:0016020: membrane;GO:0030136: clathrin-coated vesicle;GO:0031410: cytoplasmic vesicle;GO:0043005: neuron projection	GO:0005515: protein binding;GO:0035615: clathrin adaptor activity
ENSG00000008083|JARID2	2532.42	-1.25425	0.339772	-3.69146	0.000222967	0.00926945	GO:0000122: negative regulation of transcription by RNA polymerase II;GO:0001889: liver development;GO:0006338: chromatin remodeling;GO:0007417: central nervous system development;GO:0010614: negative regulation of cardiac muscle hypertrophy;GO:0016577: histone demethylation;GO:0031061: negative regulation of histone methylation;GO:0045892: negative regulation of transcription, DNA-templated;GO:0…	GO:0005634: nucleus;GO:0005634: nucleus;GO:0005654: nucleoplasm;GO:0005654: nucleoplasm;GO:0005739: mitochondrion;GO:0035097: histone methyltransferase complex;GO:0035098: ESC/E(Z) complex	GO:0003677: DNA binding;GO:0003682: chromatin binding;GO:0032452: histone demethylase activity;GO:0032452: histone demethylase activity;GO:0034647: histone H3-tri/di/monomethyl-lysine-4 demethylase activity
ENSG00000281383|FP671120.7	179869	4.25384	1.15391	3.68645	0.000227402	0.00943001
ENSG00000165633|VSTM4	2610.57	-1.12025	0.304276	-3.68167	0.000231707	0.00958441		GO:0005576: extracellular region;GO:0005886: plasma membrane;GO:0016021: integral component of membrane	GO:0005515: protein binding
ENSG00000106484|MEST	151.417	1.68021	0.456818	3.67808	0.000234997	0.0096854	GO:0007498: mesoderm development;GO:0010883: regulation of lipid storage	GO:0005783: endoplasmic reticulum;GO:0005783: endoplasmic reticulum;GO:0005789: endoplasmic reticulum membrane;GO:0016021: integral component of membrane;GO:0070062: extracellular exosome	GO:0005515: protein binding;GO:0016787: hydrolase activity
ENSG00000198074|AKR1B10	726.41	1.14695	0.311863	3.67772	0.000235325	0.0096854	GO:0001523: retinoid metabolic process;GO:0001523: retinoid metabolic process;GO:0016488: farnesol catabolic process;GO:0042572: retinol metabolic process;GO:0044597: daunorubicin metabolic process;GO:0044598: doxorubicin metabolic process;GO:0110095: cellular detoxification of aldehyde	GO:0005576: extracellular region;GO:0005739: mitochondrion;GO:0005764: lysosome;GO:0005829: cytosol;GO:0005829: cytosol	GO:0001758: retinal dehydrogenase activity;GO:0004032: alditol:NADP+ 1-oxidoreductase activity;GO:0004033: aldo-keto reductase (NADP) activity;GO:0005515: protein binding;GO:0008106: alcohol dehydrogenase (NADP+) activity;GO:0045550: geranylgeranyl reductase activity;GO:0047655: allyl-alcohol dehydrogenase activity;GO:0047718: indanol dehydrogenase activity;GO:0047834: D-threo-aldose 1-dehydrogen…
ENSG00000184785|SMIM10	1160.27	1.36284	0.370635	3.67705	0.000235944	0.00968663		GO:0016021: integral component of membrane
ENSG00000105650|PDE4C	264.171	1.34181	0.365097	3.67522	0.000237648	0.00973233	GO:0006198: cAMP catabolic process;GO:0007165: signal transduction	GO:0005615: extracellular space;GO:0005634: nucleus;GO:0005829: cytosol;GO:0005829: cytosol;GO:0005929: cilium;GO:0048471: perinuclear region of cytoplasm	GO:0004114: 3',5'-cyclic-nucleotide phosphodiesterase activity;GO:0004115: 3',5'-cyclic-AMP phosphodiesterase activity;GO:0004115: 3',5'-cyclic-AMP phosphodiesterase activity;GO:0046872: metal ion binding
ENSG00000261067|AC109460.3	179.693	-1.90375	0.518451	-3.67199	0.000240668	0.00980723
ENSG00000156140|ADAMTS3	215.015	-1.37172	0.373517	-3.67244	0.000240242	0.00980723	GO:0001701: in utero embryonic development;GO:0010573: vascular endothelial growth factor production;GO:0016485: protein processing;GO:0030198: extracellular matrix organization;GO:0030199: collagen fibril organization;GO:0030199: collagen fibril organization;GO:0030199: collagen fibril organization;GO:0030574: collagen catabolic process;GO:0032964: collagen biosynthetic process;GO:0097435: supra…	GO:0005576: extracellular region;GO:0005615: extracellular space;GO:0031012: extracellular matrix;GO:0031012: extracellular matrix;GO:0062023: collagen-containing extracellular matrix;GO:0070062: extracellular exosome	GO:0004175: endopeptidase activity;GO:0004222: metalloendopeptidase activity;GO:0004222: metalloendopeptidase activity;GO:0004222: metalloendopeptidase activity;GO:0005515: protein binding;GO:0008201: heparin binding;GO:0008270: zinc ion binding
ENSG00000198542|ITGBL1	2594.67	1.09636	0.298668	3.67082	0.000241774	0.00982798	GO:0007155: cell adhesion;GO:0007160: cell-matrix adhesion;GO:0007229: integrin-mediated signaling pathway;GO:0016477: cell migration;GO:0033627: cell adhesion mediated by integrin	GO:0005576: extracellular region;GO:0005886: plasma membrane;GO:0005925: focal adhesion;GO:0008305: integrin complex;GO:0009986: cell surface	GO:0005178: integrin binding
ENSG00000172508|CARNS1	66.7662	2.3509	0.640957	3.66779	0.000244657	0.00992065	GO:0006548: histidine catabolic process;GO:0035499: carnosine biosynthetic process;GO:0035499: carnosine biosynthetic process	GO:0005575: cellular_component;GO:0005829: cytosol	GO:0005524: ATP binding;GO:0046872: metal ion binding;GO:0047730: carnosine synthase activity;GO:0047730: carnosine synthase activity;GO:0102102: homocarnosine synthase activity
ENSG00000101222|SPEF1	120.223	1.6944	0.463428	3.65623	0.00025595	0.0103277	GO:0001578: microtubule bundle formation;GO:0003341: cilium movement;GO:0007026: negative regulation of microtubule depolymerization;GO:0016477: cell migration;GO:0030032: lamellipodium assembly;GO:0046847: filopodium assembly;GO:0051493: regulation of cytoskeleton organization;GO:0060548: negative regulation of cell death;GO:1904158: axonemal central apparatus assembly;GO:2000095: regulation of …	GO:0005737: cytoplasm;GO:0005874: microtubule;GO:0005902: microvillus;GO:0005930: axoneme;GO:0005930: axoneme;GO:0016323: basolateral plasma membrane;GO:0016324: apical plasma membrane;GO:0016324: apical plasma membrane;GO:0030027: lamellipodium;GO:0030175: filopodium;GO:0097542: ciliary tip;GO:0097729: 9+2 motile cilium;GO:1990716: axonemal central apparatus	GO:0003674: molecular_function;GO:0003779: actin binding;GO:0005515: protein binding;GO:0008017: microtubule binding;GO:0008017: microtubule binding
ENSG00000276180|H4C9	76.0601	1.96737	0.537997	3.65684	0.000255343	0.0103277	GO:0006334: nucleosome assembly;GO:0006334: nucleosome assembly;GO:0006335: DNA replication-dependent chromatin assembly;GO:0006336: DNA replication-independent chromatin assembly;GO:0006352: DNA-templated transcription, initiation;GO:0032200: telomere organization;GO:0045653: negative regulation of megakaryocyte differentiation	GO:0000228: nuclear chromosome;GO:0000781: chromosome, telomeric region;GO:0000786: nucleosome;GO:0000786: nucleosome;GO:0005576: extracellular region;GO:0005634: nucleus;GO:0005634: nucleus;GO:0005654: nucleoplasm;GO:0016020: membrane;GO:0032991: protein-containing complex;GO:0070062: extracellular exosome	GO:0003677: DNA binding;GO:0003677: DNA binding;GO:0003723: RNA binding;GO:0005515: protein binding;GO:0019904: protein domain specific binding;GO:0046982: protein heterodimerization activity
ENSG00000166387|PPFIBP2	126.486	1.52751	0.417909	3.65512	0.00025706	0.0103471	GO:0007528: neuromuscular junction development;GO:0050808: synapse organization	GO:0005615: extracellular space;GO:0005829: cytosol;GO:0048786: presynaptic active zone	GO:0003674: molecular_function;GO:0005515: protein binding;GO:0042802: identical protein binding
ENSG00000170340|B3GNT2	1228.86	-1.09594	0.300578	-3.64613	0.000266223	0.0106801	GO:0007411: axon guidance;GO:0007608: sensory perception of smell;GO:0016266: O-glycan processing;GO:0018146: keratan sulfate biosynthetic process;GO:0030311: poly-N-acetyllactosamine biosynthetic process;GO:0030311: poly-N-acetyllactosamine biosynthetic process;GO:1990830: cellular response to leukemia inhibitory factor	GO:0000139: Golgi membrane;GO:0000139: Golgi membrane;GO:0016021: integral component of membrane	GO:0005515: protein binding;GO:0008194: UDP-glycosyltransferase activity;GO:0008457: beta-galactosyl-N-acetylglucosaminylgalactosylglucosyl-ceramide beta-1,3-acetylglucosaminyltransferase activity;GO:0008499: UDP-galactose:beta-N-acetylglucosamine beta-1,3-galactosyltransferase activity;GO:0008532: N-acetyllactosaminide beta-1,3-N-acetylglucosaminyltransferase activity;GO:0008532: N-acetyllactosa…
ENSG00000170485|NPAS2	2879.28	-1.15901	0.317909	-3.64573	0.00026663	0.0106801	GO:0006357: regulation of transcription by RNA polymerase II;GO:0006974: cellular response to DNA damage stimulus;GO:0007417: central nervous system development;GO:0009410: response to xenobiotic stimulus;GO:0032922: circadian regulation of gene expression;GO:0032922: circadian regulation of gene expression;GO:0045739: positive regulation of DNA repair;GO:0045893: positive regulation of transcrip…	GO:0000785: chromatin;GO:0005634: nucleus;GO:0005654: nucleoplasm;GO:0005654: nucleoplasm;GO:0005667: transcription regulator complex;GO:0005829: cytosol;GO:1990513: CLOCK-BMAL transcription complex	GO:0000978: RNA polymerase II cis-regulatory region sequence-specific DNA binding;GO:0000978: RNA polymerase II cis-regulatory region sequence-specific DNA binding;GO:0000981: DNA-binding transcription factor activity, RNA polymerase II-specific;GO:0000981: DNA-binding transcription factor activity, RNA polymerase II-specific;GO:0003677: DNA binding;GO:0003677: DNA binding;GO:0003700: DNA-binding…
ENSG00000176020|AMIGO3	131.15	1.53528	0.42126	3.64448	0.000267929	0.0107012	GO:0007157: heterophilic cell-cell adhesion via plasma membrane cell adhesion molecules;GO:0007420: brain development;GO:0051965: positive regulation of synapse assembly	GO:0016021: integral component of membrane
ENSG00000153292|ADGRF1	28.8572	2.75914	0.757178	3.64398	0.000268456	0.0107012	GO:0007166: cell surface receptor signaling pathway;GO:0007186: G protein-coupled receptor signaling pathway;GO:0007189: adenylate cyclase-activating G protein-coupled receptor signaling pathway;GO:0007416: synapse assembly;GO:0007613: memory;GO:0031175: neuron projection development;GO:0032793: positive regulation of CREB transcription factor activity	GO:0005576: extracellular region;GO:0005886: plasma membrane;GO:0016021: integral component of membrane	GO:0004930: G protein-coupled receptor activity
ENSG00000142089|IFITM3	131.482	1.59206	0.437036	3.64286	0.000269631	0.0107221	GO:0006955: immune response;GO:0009615: response to virus;GO:0032897: negative regulation of viral transcription;GO:0034341: response to interferon-gamma;GO:0034341: response to interferon-gamma;GO:0035455: response to interferon-alpha;GO:0035455: response to interferon-alpha;GO:0035456: response to interferon-beta;GO:0035456: response to interferon-beta;GO:0045071: negative regulation of viral g…	GO:0005765: lysosomal membrane;GO:0005886: plasma membrane;GO:0005886: plasma membrane;GO:0005886: plasma membrane;GO:0016021: integral component of membrane;GO:0031901: early endosome membrane;GO:0031902: late endosome membrane;GO:0032991: protein-containing complex;GO:0048471: perinuclear region of cytoplasm	GO:0005515: protein binding
ENSG00000166676|TVP23A	492.33	-1.26779	0.348217	-3.6408	0.000271796	0.0107821	GO:0009306: protein secretion;GO:0016192: vesicle-mediated transport	GO:0030173: integral component of Golgi membrane	GO:0005515: protein binding
ENSG00000280800|FP671120.6	168800	4.21968	1.15993	3.63788	0.000274887	0.0108631
ENSG00000123453|SARDH	510.75	1.13561	0.312183	3.63763	0.000275157	0.0108631	GO:1901053: sarcosine catabolic process	GO:0005737: cytoplasm;GO:0005739: mitochondrion;GO:0005739: mitochondrion;GO:0005759: mitochondrial matrix;GO:0005759: mitochondrial matrix	GO:0008480: sarcosine dehydrogenase activity;GO:0016491: oxidoreductase activity
ENSG00000049192|ADAMTS6	565.334	-1.6949	0.466329	-3.63456	0.000278458	0.0109671	GO:0001822: kidney development;GO:0003279: cardiac septum development;GO:0006508: proteolysis;GO:0030198: extracellular matrix organization;GO:0035904: aorta development;GO:0060976: coronary vasculature development	GO:0005576: extracellular region;GO:0031012: extracellular matrix	GO:0004222: metalloendopeptidase activity;GO:0008237: metallopeptidase activity;GO:0046872: metal ion binding
ENSG00000108825|PTGES3L-AARSD1	36.5492	-2.89561	0.797618	-3.63032	0.000283067	0.011122
ENSG00000108176|DNAJC12	326.716	1.41494	0.390201	3.62618	0.000287649	0.0112752		GO:0005737: cytoplasm	GO:0005515: protein binding
ENSG00000137309|HMGA1	19180.7	-1.03861	0.286581	-3.62415	0.000289918	0.0113371	GO:0006268: DNA unwinding involved in DNA replication;GO:0006337: nucleosome disassembly;GO:0006355: regulation of transcription, DNA-templated;GO:0008285: negative regulation of cell population proliferation;GO:0009615: response to virus;GO:0045892: negative regulation of transcription, DNA-templated;GO:0045893: positive regulation of transcription, DNA-templated;GO:0045944: positive regulation …	GO:0005634: nucleus;GO:0005634: nucleus;GO:0005634: nucleus;GO:0005654: nucleoplasm;GO:0005667: transcription regulator complex;GO:0005829: cytosol;GO:0005925: focal adhesion;GO:0035985: senescence-associated heterochromatin focus;GO:0090575: RNA polymerase II transcription regulator complex	GO:0000987: cis-regulatory region sequence-specific DNA binding;GO:0003677: DNA binding;GO:0003680: minor groove of adenine-thymine-rich DNA binding;GO:0003680: minor groove of adenine-thymine-rich DNA binding;GO:0003680: minor groove of adenine-thymine-rich DNA binding;GO:0003682: chromatin binding;GO:0003712: transcription coregulator activity;GO:0003713: transcription coactivator activity;GO:0…
ENSG00000178409|BEND3	91.5777	-1.73649	0.479251	-3.62333	0.000290833	0.011346	GO:0000122: negative regulation of transcription by RNA polymerase II;GO:0000122: negative regulation of transcription by RNA polymerase II;GO:0000183: rDNA heterochromatin assembly;GO:0000183: rDNA heterochromatin assembly;GO:0006306: DNA methylation;GO:0034773: histone H4-K20 trimethylation;GO:0036124: histone H3-K9 trimethylation;GO:0043967: histone H4 acetylation;GO:0051260: protein homooligo…	GO:0000792: heterochromatin;GO:0005654: nucleoplasm;GO:0005730: nucleolus	GO:0000182: rDNA binding;GO:0000182: rDNA binding;GO:0005515: protein binding
ENSG00000105976|MET	8031.59	-1.14025	0.314945	-3.62047	0.000294071	0.0114451	GO:0001886: endothelial cell morphogenesis;GO:0001889: liver development;GO:0006909: phagocytosis;GO:0007165: signal transduction;GO:0007166: cell surface receptor signaling pathway;GO:0007169: transmembrane receptor protein tyrosine kinase signaling pathway;GO:0007275: multicellular organism development;GO:0007399: nervous system development;GO:0010507: negative regulation of autophagy;GO:001647…	GO:0005576: extracellular region;GO:0005886: plasma membrane;GO:0005887: integral component of plasma membrane;GO:0009925: basal plasma membrane;GO:0009925: basal plasma membrane;GO:0009986: cell surface;GO:0016021: integral component of membrane;GO:0043235: receptor complex	GO:0004713: protein tyrosine kinase activity;GO:0004713: protein tyrosine kinase activity;GO:0004714: transmembrane receptor protein tyrosine kinase activity;GO:0005008: hepatocyte growth factor-activated receptor activity;GO:0005515: protein binding;GO:0005524: ATP binding;GO:0017154: semaphorin receptor activity;GO:0019903: protein phosphatase binding;GO:0042802: identical protein binding
ENSG00000247095|MIR210HG	761.677	1.2069	0.333466	3.61926	0.000295446	0.0114715
ENSG00000140873|ADAMTS18	260.194	-1.26581	0.349966	-3.61695	0.000298095	0.0115471	GO:0001654: eye development;GO:0006508: proteolysis;GO:0030198: extracellular matrix organization;GO:0090331: negative regulation of platelet aggregation	GO:0005576: extracellular region;GO:0031012: extracellular matrix	GO:0004222: metalloendopeptidase activity;GO:0046872: metal ion binding
ENSG00000143341|HMCN1	1366.59	1.95359	0.54057	3.61395	0.000301572	0.0116544	GO:0007049: cell cycle;GO:0007156: homophilic cell adhesion via plasma membrane adhesion molecules;GO:0007157: heterophilic cell-cell adhesion via plasma membrane cell adhesion molecules;GO:0007601: visual perception;GO:0009617: response to bacterium;GO:0051301: cell division	GO:0005604: basement membrane;GO:0005912: adherens junction;GO:0005938: cell cortex;GO:0032154: cleavage furrow;GO:0062023: collagen-containing extracellular matrix;GO:0062023: collagen-containing extracellular matrix;GO:0062023: collagen-containing extracellular matrix;GO:0070062: extracellular exosome	GO:0005201: extracellular matrix structural constituent;GO:0005509: calcium ion binding;GO:0005515: protein binding
ENSG00000198520|ARMH1	23.4544	3.12926	0.867007	3.60926	0.000307068	0.0118113
ENSG00000196968|FUT11	1629.14	1.05292	0.291685	3.60977	0.000306473	0.0118113	GO:0006486: protein glycosylation;GO:0036065: fucosylation	GO:0016021: integral component of membrane;GO:0032580: Golgi cisterna membrane	GO:0005515: protein binding;GO:0046920: alpha-(1->3)-fucosyltransferase activity
ENSG00000213599|SLX1A-SULT1A3	605.763	1.53797	0.426291	3.60778	0.00030883	0.0118514
ENSG00000143028|SYPL2	38.2534	-2.39405	0.663876	-3.60617	0.000310748	0.0118557	GO:0006874: cellular calcium ion homeostasis;GO:0007507: heart development;GO:0021762: substantia nigra development;GO:0033292: T-tubule organization	GO:0016021: integral component of membrane;GO:0030672: synaptic vesicle membrane
ENSG00000141505|ASGR1	45.8604	2.37468	0.658473	3.60634	0.000310545	0.0118557	GO:0006898: receptor-mediated endocytosis;GO:0031668: cellular response to extracellular stimulus;GO:0044419: biological process involved in interspecies interaction between organisms	GO:0005576: extracellular region;GO:0005886: plasma membrane;GO:0005887: integral component of plasma membrane;GO:0009897: external side of plasma membrane	GO:0004873: asialoglycoprotein receptor activity;GO:0005515: protein binding;GO:0030246: carbohydrate binding;GO:0030246: carbohydrate binding;GO:0042802: identical protein binding;GO:0046872: metal ion binding
ENSG00000234520|HRAT17	281.025	1.28684	0.356873	3.60588	0.000311102	0.0118557
ENSG00000163638|ADAMTS9	133.61	-2.25869	0.626539	-3.60502	0.000312128	0.0118674	GO:0003179: heart valve morphogenesis;GO:0003229: ventricular cardiac muscle tissue development;GO:0006508: proteolysis;GO:0006516: glycoprotein catabolic process;GO:0007275: multicellular organism development;GO:0010596: negative regulation of endothelial cell migration;GO:0015031: protein transport;GO:0016192: vesicle-mediated transport;GO:0030198: extracellular matrix organization;GO:0030198: …	GO:0005576: extracellular region;GO:0005783: endoplasmic reticulum;GO:0031012: extracellular matrix;GO:0031012: extracellular matrix;GO:0043231: intracellular membrane-bounded organelle;GO:0062023: collagen-containing extracellular matrix	GO:0004222: metalloendopeptidase activity;GO:0008237: metallopeptidase activity;GO:0008270: zinc ion binding
ENSG00000158813|EDA	31.7159	2.73473	0.759156	3.60233	0.000315378	0.0119633	GO:0006955: immune response;GO:0007160: cell-matrix adhesion;GO:0007165: signal transduction;GO:0010467: gene expression;GO:0010628: positive regulation of gene expression;GO:0030154: cell differentiation;GO:0042475: odontogenesis of dentin-containing tooth;GO:0043123: positive regulation of I-kappaB kinase/NF-kappaB signaling;GO:0043473: pigmentation;GO:0048513: animal organ development;GO:00510…	GO:0005581: collagen trimer;GO:0005615: extracellular space;GO:0005789: endoplasmic reticulum membrane;GO:0005811: lipid droplet;GO:0005856: cytoskeleton;GO:0005886: plasma membrane;GO:0005887: integral component of plasma membrane;GO:0016020: membrane;GO:0016021: integral component of membrane;GO:0043231: intracellular membrane-bounded organelle;GO:0045177: apical part of cell	GO:0005102: signaling receptor binding;GO:0005123: death receptor binding;GO:0005164: tumor necrosis factor receptor binding;GO:0005515: protein binding;GO:0038177: death receptor agonist activity;GO:0048018: receptor ligand activity
ENSG00000213339|QTRT1	766.686	1.41021	0.391561	3.60152	0.000316367	0.0119732	GO:0006400: tRNA modification;GO:0101030: tRNA-guanine transglycosylation;GO:0101030: tRNA-guanine transglycosylation;GO:0101030: tRNA-guanine transglycosylation	GO:0005634: nucleus;GO:0005741: mitochondrial outer membrane;GO:0032991: protein-containing complex	GO:0008479: queuine tRNA-ribosyltransferase activity;GO:0008479: queuine tRNA-ribosyltransferase activity;GO:0008479: queuine tRNA-ribosyltransferase activity;GO:0042803: protein homodimerization activity;GO:0046872: metal ion binding;GO:0046982: protein heterodimerization activity
ENSG00000205129|C4orf47	546.058	1.24446	0.345603	3.60084	0.000317192	0.0119769		GO:0005813: centrosome;GO:0005813: centrosome;GO:0005881: cytoplasmic microtubule;GO:0097731: 9+0 non-motile cilium
ENSG00000111229|ARPC3	23265.5	1.40893	0.391556	3.59828	0.000320333	0.0120678	GO:0034314: Arp2/3 complex-mediated actin nucleation;GO:0034314: Arp2/3 complex-mediated actin nucleation;GO:0070358: actin polymerization-dependent cell motility;GO:1990090: cellular response to nerve growth factor stimulus	GO:0005634: nucleus;GO:0005829: cytosol;GO:0005885: Arp2/3 protein complex;GO:0005885: Arp2/3 protein complex;GO:0005925: focal adhesion;GO:0015629: actin cytoskeleton;GO:0016020: membrane;GO:0030027: lamellipodium;GO:0031941: filamentous actin;GO:0035861: site of double-strand break;GO:0061850: growth cone leading edge;GO:0070062: extracellular exosome	GO:0005200: structural constituent of cytoskeleton;GO:0005515: protein binding;GO:0051015: actin filament binding;GO:0051015: actin filament binding
ENSG00000184809|B3GALT5-AS1	237.262	-1.42837	0.397784	-3.59081	0.00032965	0.0123905
ENSG00000156042|CFAP70	236.818	1.42347	0.39673	3.58801	0.000333214	0.0124959	GO:0003341: cilium movement;GO:0008150: biological_process;GO:0060271: cilium assembly	GO:0005930: axoneme;GO:0036064: ciliary basal body;GO:0036126: sperm flagellum;GO:0036157: outer dynein arm;GO:0070062: extracellular exosome	GO:0003674: molecular_function
ENSG00000183208|GDPGP1	35.201	2.66474	0.74355	3.58382	0.000338612	0.0126695	GO:0006006: glucose metabolic process;GO:0006006: glucose metabolic process;GO:0050790: regulation of catalytic activity	GO:0005737: cytoplasm;GO:0005737: cytoplasm	GO:0000166: nucleotide binding;GO:0005085: guanyl-nucleotide exchange factor activity;GO:0016779: nucleotidyltransferase activity;GO:0016787: hydrolase activity;GO:0080048: GDP-D-glucose phosphorylase activity;GO:0080048: GDP-D-glucose phosphorylase activity
ENSG00000130224|LRCH2	378.689	-1.48372	0.41455	-3.5791	0.000344774	0.0128708			GO:0005515: protein binding
ENSG00000162643|WDR63	143.825	1.57003	0.439353	3.57351	0.000352229	0.0131193	GO:0007018: microtubule-based movement;GO:0030336: negative regulation of cell migration;GO:0034316: negative regulation of Arp2/3 complex-mediated actin nucleation;GO:0036159: inner dynein arm assembly;GO:0045669: positive regulation of osteoblast differentiation;GO:0060294: cilium movement involved in cell motility	GO:0005737: cytoplasm;GO:0005858: axonemal dynein complex;GO:0036156: inner dynein arm	GO:0005515: protein binding;GO:0045503: dynein light chain binding;GO:0045504: dynein heavy chain binding;GO:0071933: Arp2/3 complex binding
ENSG00000243554|AC004967.1	90.1678	1.75843	0.492531	3.57018	0.000356731	0.013257
ENSG00000006695|COX10	410.382	-1.21567	0.340573	-3.56949	0.000357673	0.0132621	GO:0000266: mitochondrial fission;GO:0006783: heme biosynthetic process;GO:0006783: heme biosynthetic process;GO:0006784: heme A biosynthetic process;GO:0008535: respiratory chain complex IV assembly;GO:0009060: aerobic respiration;GO:0045333: cellular respiration;GO:0048034: heme O biosynthetic process	GO:0005730: nucleolus;GO:0005739: mitochondrion;GO:0005739: mitochondrion;GO:0005739: mitochondrion;GO:0005743: mitochondrial inner membrane;GO:0005829: cytosol;GO:0016021: integral component of membrane;GO:0070069: cytochrome complex	GO:0004311: farnesyltranstransferase activity;GO:0004311: farnesyltranstransferase activity;GO:0008495: protoheme IX farnesyltransferase activity
ENSG00000149294|NCAM1	2700.97	-1.3128	0.367852	-3.56882	0.000358595	0.0132664	GO:0007155: cell adhesion;GO:0046718: viral entry into host cell;GO:0071679: commissural neuron axon guidance;GO:2001260: regulation of semaphorin-plexin signaling pathway	GO:0000139: Golgi membrane;GO:0005576: extracellular region;GO:0005829: cytosol;GO:0005886: plasma membrane;GO:0005886: plasma membrane;GO:0009897: external side of plasma membrane;GO:0009986: cell surface;GO:0016020: membrane;GO:0016021: integral component of membrane;GO:0031225: anchored component of membrane;GO:0043005: neuron projection;GO:0062023: collagen-containing extracellular matrix	GO:0001618: virus receptor activity;GO:0005515: protein binding
ENSG00000144730|IL17RD	158.506	-1.3893	0.389494	-3.56694	0.000361176	0.0133319	GO:0010719: negative regulation of epithelial to mesenchymal transition;GO:0019221: cytokine-mediated signaling pathway;GO:0030512: negative regulation of transforming growth factor beta receptor signaling pathway	GO:0000139: Golgi membrane;GO:0005654: nucleoplasm;GO:0005794: Golgi apparatus;GO:0005886: plasma membrane;GO:0016021: integral component of membrane	GO:0030368: interleukin-17 receptor activity
ENSG00000167656|LY6D	20.4075	3.41869	0.958687	3.56601	0.000362456	0.0133492	GO:0007155: cell adhesion;GO:0030098: lymphocyte differentiation	GO:0005576: extracellular region;GO:0005886: plasma membrane;GO:0009986: cell surface;GO:0016020: membrane;GO:0031225: anchored component of membrane	GO:0005515: protein binding
ENSG00000253882|AC099548.2	383.186	1.21145	0.339978	3.56331	0.000366205	0.0134572
ENSG00000168071|CCDC88B	226.91	1.51637	0.425846	3.56084	0.000369669	0.0135241	GO:0001819: positive regulation of cytokine production;GO:0030705: cytoskeleton-dependent intracellular transport;GO:0031122: cytoplasmic microtubule organization;GO:0042102: positive regulation of T cell proliferation;GO:0042832: defense response to protozoan;GO:0050870: positive regulation of T cell activation	GO:0005737: cytoplasm;GO:0005783: endoplasmic reticulum;GO:0005794: Golgi apparatus;GO:0005813: centrosome;GO:0016020: membrane	GO:0005515: protein binding;GO:0008017: microtubule binding;GO:0051959: dynein light intermediate chain binding
ENSG00000163701|IL17RE	64.5244	1.96961	0.553128	3.56087	0.000369631	0.0135241	GO:0006954: inflammatory response;GO:0019221: cytokine-mediated signaling pathway	GO:0005576: extracellular region;GO:0005737: cytoplasm;GO:0005886: plasma membrane;GO:0016021: integral component of membrane	GO:0005515: protein binding;GO:0030368: interleukin-17 receptor activity
ENSG00000149289|ZC3H12C	272.91	-1.3919	0.391171	-3.55829	0.000373282	0.0135936	GO:0008150: biological_process;GO:0090502: RNA phosphodiester bond hydrolysis, endonucleolytic	GO:0005575: cellular_component;GO:0005634: nucleus;GO:0036464: cytoplasmic ribonucleoprotein granule	GO:0003674: molecular_function;GO:0003729: mRNA binding;GO:0004521: endoribonuclease activity;GO:0005515: protein binding;GO:0046872: metal ion binding
ENSG00000135069|PSAT1	1759.16	-1.12504	0.316221	-3.55775	0.000374045	0.0135936	GO:0006564: L-serine biosynthetic process;GO:0006564: L-serine biosynthetic process;GO:0008615: pyridoxine biosynthetic process	GO:0005737: cytoplasm;GO:0005829: cytosol;GO:0005829: cytosol;GO:0070062: extracellular exosome	GO:0004648: O-phospho-L-serine:2-oxoglutarate aminotransferase activity;GO:0004648: O-phospho-L-serine:2-oxoglutarate aminotransferase activity;GO:0005515: protein binding;GO:0030170: pyridoxal phosphate binding;GO:0042802: identical protein binding
ENSG00000286085|AL109653.3	125.056	-1.6943	0.476095	-3.55875	0.000372624	0.0135936
ENSG00000102445|RUBCNL	77.2404	-1.82512	0.513582	-3.55372	0.000379826	0.0137733	GO:0006629: lipid metabolic process;GO:0019216: regulation of lipid metabolic process;GO:0061909: autophagosome-lysosome fusion;GO:0061909: autophagosome-lysosome fusion;GO:0061910: autophagosome-endosome fusion;GO:0061910: autophagosome-endosome fusion;GO:0070873: regulation of glycogen metabolic process;GO:0097352: autophagosome maturation;GO:0097352: autophagosome maturation	GO:0000421: autophagosome membrane;GO:0000421: autophagosome membrane;GO:0031410: cytoplasmic vesicle;GO:0043231: intracellular membrane-bounded organelle	GO:0005515: protein binding;GO:0010314: phosphatidylinositol-5-phosphate binding;GO:0032266: phosphatidylinositol-3-phosphate binding;GO:0070273: phosphatidylinositol-4-phosphate binding;GO:1901981: phosphatidylinositol phosphate binding
ENSG00000140307|GTF2A2	1166.66	-1.2218	0.344056	-3.55115	0.000383547	0.0138486	GO:0006366: transcription by RNA polymerase II;GO:0006367: transcription initiation from RNA polymerase II promoter;GO:0045944: positive regulation of transcription by RNA polymerase II;GO:0051123: RNA polymerase II preinitiation complex assembly;GO:0051123: RNA polymerase II preinitiation complex assembly	GO:0005654: nucleoplasm;GO:0005654: nucleoplasm;GO:0005669: transcription factor TFIID complex;GO:0005672: transcription factor TFIIA complex;GO:0005672: transcription factor TFIIA complex;GO:0030054: cell junction	GO:0005515: protein binding;GO:0008134: transcription factor binding;GO:0016251: RNA polymerase II general transcription initiation factor activity;GO:0016251: RNA polymerase II general transcription initiation factor activity;GO:0017025: TBP-class protein binding;GO:0017025: TBP-class protein binding;GO:0042803: protein homodimerization activity;GO:0046982: protein heterodimerization activity;GO…
ENSG00000179954|SSC5D	4854.31	1.0133	0.285345	3.55113	0.000383586	0.0138486	GO:0006897: endocytosis;GO:0006952: defense response;GO:0032717: negative regulation of interleukin-8 production;GO:0042494: detection of bacterial lipoprotein;GO:0042494: detection of bacterial lipoprotein;GO:0045087: innate immune response;GO:0050829: defense response to Gram-negative bacterium;GO:0050830: defense response to Gram-positive bacterium	GO:0005615: extracellular space;GO:0005615: extracellular space;GO:0005737: cytoplasm;GO:0016020: membrane;GO:0031012: extracellular matrix;GO:0062023: collagen-containing extracellular matrix	GO:0001968: fibronectin binding;GO:0005044: scavenger receptor activity;GO:0005515: protein binding;GO:0043236: laminin binding;GO:0050840: extracellular matrix binding;GO:0050840: extracellular matrix binding
ENSG00000049089|COL9A2	399.914	1.14459	0.322447	3.5497	0.000385667	0.013863	GO:0001501: skeletal system development;GO:0030198: extracellular matrix organization	GO:0005576: extracellular region;GO:0005594: collagen type IX trimer;GO:0005615: extracellular space;GO:0005788: endoplasmic reticulum lumen;GO:0031012: extracellular matrix;GO:0062023: collagen-containing extracellular matrix	GO:0005201: extracellular matrix structural constituent;GO:0005515: protein binding;GO:0030020: extracellular matrix structural constituent conferring tensile strength;GO:0030020: extracellular matrix structural constituent conferring tensile strength
ENSG00000178772|CPN2	66.5522	-1.87281	0.527567	-3.5499	0.000385372	0.013863	GO:0050790: regulation of catalytic activity;GO:0050821: protein stabilization	GO:0005576: extracellular region;GO:0005576: extracellular region;GO:0005615: extracellular space;GO:0031012: extracellular matrix;GO:0070062: extracellular exosome;GO:0072562: blood microparticle	GO:0030234: enzyme regulator activity
ENSG00000157657|ZNF618	148.93	-1.65526	0.466871	-3.54542	0.000391985	0.0140594	GO:0006355: regulation of transcription, DNA-templated;GO:0035563: positive regulation of chromatin binding	GO:0000785: chromatin;GO:0005634: nucleus;GO:0005721: pericentric heterochromatin	GO:0001221: transcription coregulator binding;GO:0003677: DNA binding;GO:0003700: DNA-binding transcription factor activity;GO:0005515: protein binding;GO:0042802: identical protein binding;GO:0046872: metal ion binding
ENSG00000204305|AGER	117.614	1.72658	0.487935	3.53854	0.000402352	0.0143998	GO:0001666: response to hypoxia;GO:0001774: microglial cell activation;GO:0001774: microglial cell activation;GO:0001914: regulation of T cell mediated cytotoxicity;GO:0001934: positive regulation of protein phosphorylation;GO:0006897: endocytosis;GO:0006954: inflammatory response;GO:0007166: cell surface receptor signaling pathway;GO:0007611: learning or memory;GO:0009611: response to wounding;G…	GO:0001650: fibrillar center;GO:0005576: extracellular region;GO:0005886: plasma membrane;GO:0005886: plasma membrane;GO:0005886: plasma membrane;GO:0005887: integral component of plasma membrane;GO:0009986: cell surface;GO:0016324: apical plasma membrane;GO:0030054: cell junction;GO:0098794: postsynapse	GO:0001540: amyloid-beta binding;GO:0001540: amyloid-beta binding;GO:0001540: amyloid-beta binding;GO:0001540: amyloid-beta binding;GO:0004888: transmembrane signaling receptor activity;GO:0005044: scavenger receptor activity;GO:0005515: protein binding;GO:0038023: signaling receptor activity;GO:0038023: signaling receptor activity;GO:0042802: identical protein binding;GO:0044548: S100 protein bi…
ENSG00000168453|HR	225.958	1.57998	0.446703	3.53698	0.000404728	0.0144534	GO:0006357: regulation of transcription by RNA polymerase II;GO:0033169: histone H3-K9 demethylation	GO:0000118: histone deacetylase complex;GO:0000785: chromatin;GO:0005654: nucleoplasm	GO:0003712: transcription coregulator activity;GO:0005515: protein binding;GO:0016491: oxidoreductase activity;GO:0031490: chromatin DNA binding;GO:0032454: histone H3-methyl-lysine-9 demethylase activity;GO:0046872: metal ion binding
ENSG00000174721|FGFBP3	113.825	1.52821	0.432354	3.53462	0.000408361	0.0145516	GO:0007267: cell-cell signaling;GO:0043117: positive regulation of vascular permeability;GO:0045743: positive regulation of fibroblast growth factor receptor signaling pathway	GO:0005576: extracellular region;GO:0062023: collagen-containing extracellular matrix	GO:0008201: heparin binding;GO:0017134: fibroblast growth factor binding;GO:0019838: growth factor binding
ENSG00000143554|SLC27A3	309.401	1.24511	0.352728	3.52994	0.000415659	0.0147797	GO:0001676: long-chain fatty acid metabolic process;GO:0015908: fatty acid transport;GO:0015909: long-chain fatty acid transport	GO:0005739: mitochondrion;GO:0005739: mitochondrion;GO:0005783: endoplasmic reticulum;GO:0005783: endoplasmic reticulum;GO:0016020: membrane;GO:0016021: integral component of membrane;GO:0031966: mitochondrial membrane	GO:0004467: long-chain fatty acid-CoA ligase activity;GO:0004467: long-chain fatty acid-CoA ligase activity;GO:0005324: long-chain fatty acid transporter activity;GO:0005524: ATP binding;GO:0031957: very long-chain fatty acid-CoA ligase activity;GO:0047676: arachidonate-CoA ligase activity
ENSG00000210082|MT-RNR2	756709	1.00124	0.284059	3.52476	0.000423866	0.0150067
ENSG00000171388|APLN	3360.25	1.06708	0.30273	3.52485	0.000423725	0.0150067	GO:0001525: angiogenesis;GO:0002026: regulation of the force of heart contraction;GO:0003085: negative regulation of systemic arterial blood pressure;GO:0006955: immune response;GO:0007165: signal transduction;GO:0007369: gastrulation;GO:0007595: lactation;GO:0010460: positive regulation of heart rate;GO:0010629: negative regulation of gene expression;GO:0031652: positive regulation of heat gener…	GO:0005576: extracellular region;GO:0005576: extracellular region;GO:0005615: extracellular space;GO:0048471: perinuclear region of cytoplasm	GO:0005102: signaling receptor binding;GO:0005179: hormone activity;GO:0031704: apelin receptor binding;GO:0042802: identical protein binding
ENSG00000272894|AC004982.2	200.799	1.30311	0.370461	3.51754	0.00043557	0.0153879
ENSG00000104343|UBE2W	283.409	-1.5011	0.426971	-3.5157	0.000438591	0.0154615	GO:0000209: protein polyubiquitination;GO:0006281: DNA repair;GO:0006513: protein monoubiquitination;GO:0006513: protein monoubiquitination;GO:0006515: protein quality control for misfolded or incompletely synthesized proteins;GO:0043161: proteasome-mediated ubiquitin-dependent protein catabolic process;GO:0043161: proteasome-mediated ubiquitin-dependent protein catabolic process;GO:0070979: prot…	GO:0005634: nucleus;GO:0005654: nucleoplasm	GO:0004842: ubiquitin-protein transferase activity;GO:0004842: ubiquitin-protein transferase activity;GO:0005515: protein binding;GO:0005524: ATP binding;GO:0031625: ubiquitin protein ligase binding;GO:0061631: ubiquitin conjugating enzyme activity
ENSG00000126878|AIF1L	246.329	1.28485	0.365765	3.51277	0.000443468	0.0156	GO:0051017: actin filament bundle assembly;GO:0097178: ruffle assembly	GO:0005737: cytoplasm;GO:0005884: actin filament;GO:0005884: actin filament;GO:0005925: focal adhesion;GO:0015629: actin cytoskeleton;GO:0032587: ruffle membrane;GO:0032991: protein-containing complex;GO:0070062: extracellular exosome	GO:0005509: calcium ion binding;GO:0051015: actin filament binding;GO:0051015: actin filament binding
ENSG00000118922|KLF12	1007.07	-1.19724	0.341106	-3.50988	0.000448304	0.0156365	GO:0000122: negative regulation of transcription by RNA polymerase II;GO:0000122: negative regulation of transcription by RNA polymerase II;GO:0006357: regulation of transcription by RNA polymerase II;GO:0045944: positive regulation of transcription by RNA polymerase II	GO:0000785: chromatin;GO:0005654: nucleoplasm;GO:0005829: cytosol	GO:0000978: RNA polymerase II cis-regulatory region sequence-specific DNA binding;GO:0000978: RNA polymerase II cis-regulatory region sequence-specific DNA binding;GO:0000981: DNA-binding transcription factor activity, RNA polymerase II-specific;GO:0000981: DNA-binding transcription factor activity, RNA polymerase II-specific;GO:0001227: DNA-binding transcription repressor activity, RNA polymeras…
ENSG00000103034|NDRG4	711.238	1.06019	0.301971	3.51089	0.000446604	0.0156365	GO:0001947: heart looping;GO:0007165: signal transduction;GO:0007420: brain development;GO:0008542: visual learning;GO:0010642: negative regulation of platelet-derived growth factor receptor signaling pathway;GO:0010976: positive regulation of neuron projection development;GO:0014912: negative regulation of smooth muscle cell migration;GO:0030154: cell differentiation;GO:0035050: embryonic heart …	GO:0005737: cytoplasm;GO:0005737: cytoplasm;GO:0005737: cytoplasm;GO:0005739: mitochondrion;GO:0005789: endoplasmic reticulum membrane;GO:0005829: cytosol;GO:0016323: basolateral plasma membrane;GO:0031253: cell projection membrane	GO:0003674: molecular_function;GO:0005515: protein binding
ENSG00000164484|TMEM200A	162.013	-1.41296	0.40254	-3.5101	0.000447935	0.0156365		GO:0016021: integral component of membrane	GO:0005515: protein binding
ENSG00000243978|RTL9	125.57	-1.64517	0.468619	-3.51068	0.000446969	0.0156365
ENSG00000146678|IGFBP1	1666.05	1.07949	0.308566	3.4984	0.000468064	0.0162912	GO:0007165: signal transduction;GO:0007568: aging;GO:0008286: insulin receptor signaling pathway;GO:0030307: positive regulation of cell growth;GO:0042246: tissue regeneration;GO:0043567: regulation of insulin-like growth factor receptor signaling pathway;GO:0090090: negative regulation of canonical Wnt signaling pathway	GO:0005576: extracellular region;GO:0005615: extracellular space;GO:0005788: endoplasmic reticulum lumen;GO:0005794: Golgi apparatus	GO:0005102: signaling receptor binding;GO:0005515: protein binding;GO:0005520: insulin-like growth factor binding;GO:0031994: insulin-like growth factor I binding;GO:0031994: insulin-like growth factor I binding;GO:0031995: insulin-like growth factor II binding;GO:0031995: insulin-like growth factor II binding
ENSG00000284820|AC068946.2	637.811	1.47727	0.422629	3.49544	0.000473279	0.0164379
ENSG00000069011|PITX1	338.7	-1.17592	0.336649	-3.49302	0.000477594	0.0165529	GO:0001501: skeletal system development;GO:0006357: regulation of transcription by RNA polymerase II;GO:0009653: anatomical structure morphogenesis;GO:0014707: branchiomeric skeletal muscle development;GO:0021983: pituitary gland development;GO:0035116: embryonic hindlimb morphogenesis;GO:0045892: negative regulation of transcription, DNA-templated;GO:0045944: positive regulation of transcription…	GO:0000785: chromatin;GO:0005634: nucleus;GO:0005634: nucleus;GO:0005667: transcription regulator complex;GO:0005737: cytoplasm	GO:0000978: RNA polymerase II cis-regulatory region sequence-specific DNA binding;GO:0000981: DNA-binding transcription factor activity, RNA polymerase II-specific;GO:0000981: DNA-binding transcription factor activity, RNA polymerase II-specific;GO:0001228: DNA-binding transcription activator activity, RNA polymerase II-specific;GO:0003700: DNA-binding transcription factor activity;GO:0005515: pr…
ENSG00000138443|ABI2	5586.41	-1.05877	0.303163	-3.4924	0.000478697	0.0165563	GO:0007010: cytoskeleton organization;GO:0007399: nervous system development;GO:0008154: actin polymerization or depolymerization;GO:0010592: positive regulation of lamellipodium assembly;GO:0016477: cell migration;GO:0016601: Rac protein signal transduction;GO:0018108: peptidyl-tyrosine phosphorylation;GO:0061001: regulation of dendritic spine morphogenesis;GO:0070309: lens fiber cell morphogene…	GO:0005634: nucleus;GO:0005737: cytoplasm;GO:0005829: cytosol;GO:0005856: cytoskeleton;GO:0005912: adherens junction;GO:0030027: lamellipodium;GO:0030027: lamellipodium;GO:0031209: SCAR complex;GO:0032433: filopodium tip;GO:0043197: dendritic spine	GO:0005515: protein binding;GO:0008093: cytoskeletal anchor activity;GO:0017124: SH3 domain binding;GO:0017124: SH3 domain binding;GO:0017124: SH3 domain binding;GO:0019900: kinase binding;GO:0031267: small GTPase binding;GO:0031625: ubiquitin protein ligase binding;GO:0035591: signaling adaptor activity;GO:0042802: identical protein binding;GO:0070064: proline-rich region binding
ENSG00000166762|CATSPER2	186.589	1.39539	0.399763	3.49055	0.000482021	0.0166363	GO:0009566: fertilization;GO:0030317: flagellated sperm motility;GO:0034765: regulation of ion transmembrane transport;GO:0048240: sperm capacitation;GO:0070588: calcium ion transmembrane transport	GO:0005886: plasma membrane;GO:0031514: motile cilium;GO:0036128: CatSper complex;GO:0036128: CatSper complex	GO:0005227: calcium activated cation channel activity;GO:0005244: voltage-gated ion channel activity;GO:0005262: calcium channel activity;GO:0005515: protein binding
ENSG00000198626|RYR2	112.594	1.59504	0.457306	3.4879	0.000486836	0.0167673	GO:0001666: response to hypoxia;GO:0002027: regulation of heart rate;GO:0003143: embryonic heart tube morphogenesis;GO:0003220: left ventricular cardiac muscle tissue morphogenesis;GO:0003300: cardiac muscle hypertrophy;GO:0005513: detection of calcium ion;GO:0006816: calcium ion transport;GO:0006874: cellular calcium ion homeostasis;GO:0010460: positive regulation of heart rate;GO:0010881: regul…	GO:0005790: smooth endoplasmic reticulum;GO:0005886: plasma membrane;GO:0005886: plasma membrane;GO:0014701: junctional sarcoplasmic reticulum membrane;GO:0016020: membrane;GO:0016529: sarcoplasmic reticulum;GO:0030018: Z disc;GO:0030018: Z disc;GO:0030018: Z disc;GO:0030659: cytoplasmic vesicle membrane;GO:0032991: protein-containing complex;GO:0033017: sarcoplasmic reticulum membrane;GO:0033017…	GO:0005219: ryanodine-sensitive calcium-release channel activity;GO:0005219: ryanodine-sensitive calcium-release channel activity;GO:0005262: calcium channel activity;GO:0005509: calcium ion binding;GO:0005515: protein binding;GO:0005516: calmodulin binding;GO:0005516: calmodulin binding;GO:0005516: calmodulin binding;GO:0005516: calmodulin binding;GO:0015278: calcium-release channel activity;GO:…
ENSG00000118985|ELL2	3888.13	-1.06474	0.305601	-3.4841	0.000493797	0.0169716	GO:0006368: transcription elongation from RNA polymerase II promoter;GO:0042795: snRNA transcription by RNA polymerase II	GO:0005654: nucleoplasm;GO:0005654: nucleoplasm;GO:0008023: transcription elongation factor complex	GO:0005515: protein binding
ENSG00000220785|MTMR9LP	103.074	1.65191	0.47438	3.48226	0.0004972	0.0170529
ENSG00000182612|TSPAN10	308.659	1.26636	0.364108	3.47798	0.000505211	0.0172916	GO:0072594: establishment of protein localization to organelle	GO:0005887: integral component of plasma membrane	GO:0019899: enzyme binding
ENSG00000148926|ADM	1666.61	1.25816	0.362154	3.47411	0.000512555	0.0175066	GO:0001570: vasculogenesis;GO:0001666: response to hypoxia;GO:0001843: neural tube closure;GO:0002026: regulation of the force of heart contraction;GO:0002031: G protein-coupled receptor internalization;GO:0003073: regulation of systemic arterial blood pressure;GO:0006954: inflammatory response;GO:0007165: signal transduction;GO:0007189: adenylate cyclase-activating G protein-coupled receptor sig…	GO:0005576: extracellular region;GO:0005615: extracellular space;GO:0005737: cytoplasm	GO:0005102: signaling receptor binding;GO:0005179: hormone activity;GO:0031700: adrenomedullin receptor binding
ENSG00000284906|AC091057.6	1077.89	-2.13846	0.616478	-3.46883	0.000522728	0.0178171
ENSG00000268516|AC020915.2	1293.53	1.009	0.291455	3.46194	0.000536297	0.0182419
ENSG00000147872|PLIN2	107.286	1.57908	0.456441	3.45954	0.000541104	0.0183674	GO:0009410: response to xenobiotic stimulus;GO:0010890: positive regulation of sequestering of triglyceride;GO:0014070: response to organic cyclic compound;GO:0015909: long-chain fatty acid transport;GO:0019915: lipid storage	GO:0005576: extracellular region;GO:0005634: nucleus;GO:0005783: endoplasmic reticulum;GO:0005811: lipid droplet;GO:0005811: lipid droplet;GO:0005829: cytosol;GO:0005886: plasma membrane	GO:0005515: protein binding
ENSG00000217648|AL136116.3	83.0889	1.75539	0.507885	3.45628	0.000547681	0.0185524
ENSG00000137693|YAP1	2114.44	-1.01053	0.292483	-3.45501	0.000550276	0.018602	GO:0000122: negative regulation of transcription by RNA polymerase II;GO:0000902: cell morphogenesis;GO:0001570: vasculogenesis;GO:0001829: trophectodermal cell differentiation;GO:0001894: tissue homeostasis;GO:0003015: heart process;GO:0003143: embryonic heart tube morphogenesis;GO:0006974: cellular response to DNA damage stimulus;GO:0008283: cell population proliferation;GO:0010628: positive re…	GO:0001674: female germ cell nucleus;GO:0005634: nucleus;GO:0005634: nucleus;GO:0005654: nucleoplasm;GO:0005737: cytoplasm;GO:0005737: cytoplasm;GO:0005829: cytosol;GO:0005829: cytosol;GO:0016020: membrane;GO:0140552: TEAD-YAP complex	GO:0000976: transcription cis-regulatory region binding;GO:0000978: RNA polymerase II cis-regulatory region sequence-specific DNA binding;GO:0003682: chromatin binding;GO:0003713: transcription coactivator activity;GO:0003713: transcription coactivator activity;GO:0003713: transcription coactivator activity;GO:0003714: transcription corepressor activity;GO:0003714: transcription corepressor activ…
ENSG00000110987|BCL7A	563.846	-1.39769	0.404789	-3.45288	0.000554635	0.018676	GO:0045892: negative regulation of transcription, DNA-templated	GO:0005575: cellular_component	GO:0003674: molecular_function;GO:0005515: protein binding
ENSG00000004799|PDK4	379.063	1.15646	0.334929	3.45283	0.000554732	0.018676	GO:0006006: glucose metabolic process;GO:0006468: protein phosphorylation;GO:0006885: regulation of pH;GO:0008286: insulin receptor signaling pathway;GO:0009267: cellular response to starvation;GO:0010510: regulation of acetyl-CoA biosynthetic process from pyruvate;GO:0010510: regulation of acetyl-CoA biosynthetic process from pyruvate;GO:0010565: regulation of cellular ketone metabolic process;G…	GO:0005739: mitochondrion;GO:0005759: mitochondrial matrix	GO:0004672: protein kinase activity;GO:0004740: pyruvate dehydrogenase (acetyl-transferring) kinase activity;GO:0004740: pyruvate dehydrogenase (acetyl-transferring) kinase activity;GO:0004740: pyruvate dehydrogenase (acetyl-transferring) kinase activity;GO:0005515: protein binding;GO:0005524: ATP binding
ENSG00000268575|AL031282.2	144.066	-1.58234	0.458855	-3.44845	0.000563807	0.0189428
ENSG00000225706|PTPRD-AS1	68.7908	-1.90878	0.553905	-3.44605	0.000568839	0.0190729
ENSG00000049540|ELN	135.714	1.56116	0.453245	3.4444	0.00057232	0.0191506	GO:0003151: outflow tract morphogenesis;GO:0003180: aortic valve morphogenesis;GO:0007519: skeletal muscle tissue development;GO:0007585: respiratory gaseous exchange by respiratory system;GO:0008015: blood circulation;GO:0009887: animal organ morphogenesis;GO:0030198: extracellular matrix organization;GO:0030833: regulation of actin filament polymerization;GO:0043149: stress fiber assembly;GO:00…	GO:0005576: extracellular region;GO:0031012: extracellular matrix;GO:0062023: collagen-containing extracellular matrix;GO:0071953: elastic fiber	GO:0005201: extracellular matrix structural constituent;GO:0005515: protein binding;GO:0030023: extracellular matrix constituent conferring elasticity;GO:0050840: extracellular matrix binding
ENSG00000182749|PAQR7	1246.47	1.24538	0.36217	3.43866	0.000584607	0.0195221	GO:0043401: steroid hormone mediated signaling pathway;GO:0048477: oogenesis;GO:0048545: response to steroid hormone	GO:0005886: plasma membrane;GO:0016021: integral component of membrane	GO:0003707: steroid hormone receptor activity;GO:0005496: steroid binding;GO:0005515: protein binding;GO:0038023: signaling receptor activity
ENSG00000138400|MDH1B	147.884	1.55567	0.452707	3.43637	0.000589555	0.0196474	GO:0005975: carbohydrate metabolic process;GO:0006099: tricarboxylic acid cycle;GO:0006107: oxaloacetate metabolic process;GO:0006108: malate metabolic process;GO:0006734: NADH metabolic process		GO:0030060: L-malate dehydrogenase activity
ENSG00000057704|TMCC3	206.602	-1.59766	0.465733	-3.43042	0.000602658	0.0199629		GO:0005783: endoplasmic reticulum;GO:0005789: endoplasmic reticulum membrane;GO:0012505: endomembrane system;GO:0016021: integral component of membrane	GO:0005515: protein binding;GO:0042802: identical protein binding;GO:0071889: 14-3-3 protein binding
ENSG00000285077|ARHGAP11B	1182.62	1.82315	0.531425	3.43069	0.000602057	0.0199629	GO:0006543: glutamine catabolic process;GO:0007165: signal transduction;GO:0021987: cerebral cortex development;GO:0035795: negative regulation of mitochondrial membrane permeability;GO:0043547: positive regulation of GTPase activity;GO:0051056: regulation of small GTPase mediated signal transduction	GO:0005759: mitochondrial matrix;GO:0005829: cytosol	GO:0005096: GTPase activator activity;GO:0005096: GTPase activator activity;GO:0005515: protein binding
ENSG00000183549|ACSM5	1405.92	1.01156	0.294839	3.43089	0.000601615	0.0199629	GO:0006633: fatty acid biosynthetic process;GO:0006637: acyl-CoA metabolic process	GO:0005759: mitochondrial matrix	GO:0004321: fatty-acyl-CoA synthase activity;GO:0005524: ATP binding;GO:0005525: GTP binding;GO:0015645: fatty acid ligase activity;GO:0031956: medium-chain fatty acid-CoA ligase activity;GO:0046872: metal ion binding;GO:0047760: butyrate-CoA ligase activity
ENSG00000254087|LYN	466.052	-1.1197	0.326813	-3.42611	0.000612288	0.0202412	GO:0001782: B cell homeostasis;GO:0001817: regulation of cytokine production;GO:0001932: regulation of protein phosphorylation;GO:0001933: negative regulation of protein phosphorylation;GO:0001934: positive regulation of protein phosphorylation;GO:0002223: stimulatory C-type lectin receptor signaling pathway;GO:0002250: adaptive immune response;GO:0002431: Fc receptor mediated stimulatory signali…	GO:0005634: nucleus;GO:0005634: nucleus;GO:0005737: cytoplasm;GO:0005758: mitochondrial intermembrane space;GO:0005765: lysosomal membrane;GO:0005794: Golgi apparatus;GO:0005829: cytosol;GO:0005886: plasma membrane;GO:0005886: plasma membrane;GO:0005912: adherens junction;GO:0014069: postsynaptic density;GO:0030061: mitochondrial crista;GO:0030666: endocytic vesicle membrane;GO:0031234: extrinsic…	GO:0004713: protein tyrosine kinase activity;GO:0004713: protein tyrosine kinase activity;GO:0004713: protein tyrosine kinase activity;GO:0004713: protein tyrosine kinase activity;GO:0004714: transmembrane receptor protein tyrosine kinase activity;GO:0004715: non-membrane spanning protein tyrosine kinase activity;GO:0004715: non-membrane spanning protein tyrosine kinase activity;GO:0004715: non-m…
ENSG00000240694|PNMA2	352.194	-1.24579	0.363728	-3.42507	0.000614646	0.0202784	GO:0043065: positive regulation of apoptotic process	GO:0005730: nucleolus	GO:0005515: protein binding
ENSG00000182870|GALNT9	1005.53	-1.04556	0.305381	-3.42378	0.000617561	0.0203338	GO:0006493: protein O-linked glycosylation;GO:0016266: O-glycan processing	GO:0000139: Golgi membrane;GO:0005794: Golgi apparatus;GO:0016021: integral component of membrane	GO:0004653: polypeptide N-acetylgalactosaminyltransferase activity;GO:0004653: polypeptide N-acetylgalactosaminyltransferase activity;GO:0030246: carbohydrate binding;GO:0046872: metal ion binding
ENSG00000224184|MIR3681HG	294.514	1.35452	0.395701	3.42308	0.00061916	0.0203458
ENSG00000163659|TIPARP	1162.8	-1.17094	0.342324	-3.42057	0.000624903	0.0204936	GO:0001570: vasculogenesis;GO:0001822: kidney development;GO:0006471: protein ADP-ribosylation;GO:0008209: androgen metabolic process;GO:0008210: estrogen metabolic process;GO:0008585: female gonad development;GO:0009791: post-embryonic development;GO:0010629: negative regulation of gene expression;GO:0030097: hemopoiesis;GO:0045732: positive regulation of protein catabolic process;GO:0048008: pl…	GO:0005634: nucleus	GO:0000987: cis-regulatory region sequence-specific DNA binding;GO:0003950: NAD+ ADP-ribosyltransferase activity;GO:0046872: metal ion binding;GO:1990404: protein ADP-ribosylase activity
ENSG00000070182|SPTB	127.364	1.60469	0.469348	3.41897	0.000628578	0.0205326	GO:0007010: cytoskeleton organization;GO:0030036: actin cytoskeleton organization;GO:0051693: actin filament capping	GO:0005829: cytosol;GO:0005829: cytosol;GO:0005886: plasma membrane;GO:0008091: spectrin;GO:0014731: spectrin-associated cytoskeleton;GO:0015629: actin cytoskeleton;GO:0030054: cell junction;GO:0030864: cortical actin cytoskeleton;GO:0031235: intrinsic component of the cytoplasmic side of the plasma membrane;GO:0032991: protein-containing complex;GO:0042995: cell projection	GO:0003779: actin binding;GO:0005200: structural constituent of cytoskeleton;GO:0005515: protein binding;GO:0030506: ankyrin binding;GO:0051015: actin filament binding;GO:0051015: actin filament binding
ENSG00000224383|PRR29	30.813	2.4353	0.712291	3.41897	0.000628588	0.0205326
ENSG00000248746|ACTN3	90.3729	1.59171	0.466734	3.41031	0.000648889	0.0211538	GO:0006936: muscle contraction;GO:0014728: regulation of the force of skeletal muscle contraction;GO:0014732: skeletal muscle atrophy;GO:0014883: transition between fast and slow fiber;GO:0014894: response to denervation involved in regulation of muscle adaptation;GO:0030036: actin cytoskeleton organization;GO:0031448: positive regulation of fast-twitch skeletal muscle fiber contraction;GO:004298…	GO:0005829: cytosol;GO:0005884: actin filament;GO:0005886: plasma membrane;GO:0005903: brush border;GO:0005925: focal adhesion;GO:0030018: Z disc;GO:0030018: Z disc;GO:0030054: cell junction;GO:0030864: cortical actin cytoskeleton;GO:0031143: pseudopodium;GO:0042995: cell projection;GO:0070062: extracellular exosome	GO:0005178: integrin binding;GO:0005509: calcium ion binding;GO:0005515: protein binding;GO:0008307: structural constituent of muscle;GO:0042802: identical protein binding;GO:0044325: transmembrane transporter binding;GO:0051015: actin filament binding;GO:0051015: actin filament binding
ENSG00000162645|GBP2	4167.8	1.07417	0.315046	3.40955	0.0006507	0.0211709	GO:0006955: immune response;GO:0034504: protein localization to nucleus;GO:0042832: defense response to protozoan;GO:0050830: defense response to Gram-positive bacterium;GO:0071346: cellular response to interferon-gamma;GO:0071346: cellular response to interferon-gamma;GO:0071347: cellular response to interleukin-1;GO:0071356: cellular response to tumor necrosis factor	GO:0000139: Golgi membrane;GO:0005634: nucleus;GO:0005654: nucleoplasm;GO:0005737: cytoplasm;GO:0005794: Golgi apparatus;GO:0005829: cytosol;GO:0005829: cytosol;GO:0031410: cytoplasmic vesicle;GO:0048471: perinuclear region of cytoplasm	GO:0003924: GTPase activity;GO:0005515: protein binding;GO:0005525: GTP binding;GO:0042802: identical protein binding;GO:0042803: protein homodimerization activity
ENSG00000144785|AC073896.1	633.572	-1.47602	0.433168	-3.40749	0.000655629	0.0212639
ENSG00000161996|WDR90	211.249	1.35075	0.396495	3.40674	0.000657433	0.0212639	GO:0060271: cilium assembly;GO:0060271: cilium assembly	GO:0005737: cytoplasm;GO:0005814: centriole;GO:0005814: centriole	GO:0005515: protein binding
ENSG00000204815|TTC25	2241.98	1.02981	0.302247	3.40717	0.000656413	0.0212639	GO:0003341: cilium movement;GO:0007420: brain development;GO:0007507: heart development;GO:0030324: lung development;GO:0036158: outer dynein arm assembly;GO:0060287: epithelial cilium movement involved in determination of left/right asymmetry;GO:0090660: cerebrospinal fluid circulation;GO:0120197: mucociliary clearance;GO:0120229: protein localization to motile cilium	GO:0005576: extracellular region;GO:0005737: cytoplasm;GO:0005737: cytoplasm;GO:0005930: axoneme;GO:0097729: 9+2 motile cilium;GO:0120228: outer dynein arm docking complex	GO:0005515: protein binding
ENSG00000170323|FABP4	71.4468	1.87904	0.551978	3.4042	0.000663581	0.0214207	GO:0006469: negative regulation of protein kinase activity;GO:0009617: response to bacterium;GO:0015908: fatty acid transport;GO:0015909: long-chain fatty acid transport;GO:0042632: cholesterol homeostasis;GO:0045892: negative regulation of transcription, DNA-templated;GO:0050729: positive regulation of inflammatory response;GO:0050872: white fat cell differentiation;GO:0050873: brown fat cell di…	GO:0005634: nucleus;GO:0005634: nucleus;GO:0005737: cytoplasm;GO:0005737: cytoplasm;GO:0005811: lipid droplet;GO:0005829: cytosol;GO:0005829: cytosol;GO:0070062: extracellular exosome	GO:0005324: long-chain fatty acid transporter activity;GO:0005504: fatty acid binding;GO:0005504: fatty acid binding;GO:0036041: long-chain fatty acid binding;GO:0051427: hormone receptor binding
ENSG00000113263|ITK	122.441	-1.50516	0.442708	-3.39991	0.000674092	0.0217174	GO:0001819: positive regulation of cytokine production;GO:0001865: NK T cell differentiation;GO:0002250: adaptive immune response;GO:0002250: adaptive immune response;GO:0006968: cellular defense response;GO:0007165: signal transduction;GO:0007202: activation of phospholipase C activity;GO:0035556: intracellular signal transduction;GO:0038083: peptidyl-tyrosine autophosphorylation;GO:0042110: T c…	GO:0005634: nucleus;GO:0005829: cytosol;GO:0005829: cytosol;GO:0005886: plasma membrane;GO:0005911: cell-cell junction	GO:0004713: protein tyrosine kinase activity;GO:0004714: transmembrane receptor protein tyrosine kinase activity;GO:0004715: non-membrane spanning protein tyrosine kinase activity;GO:0004715: non-membrane spanning protein tyrosine kinase activity;GO:0005515: protein binding;GO:0005524: ATP binding;GO:0046872: metal ion binding
ENSG00000130766|SESN2	1906.71	-1.09468	0.322108	-3.3985	0.00067757	0.0217301	GO:0001932: regulation of protein phosphorylation;GO:0006111: regulation of gluconeogenesis;GO:0006635: fatty acid beta-oxidation;GO:0009749: response to glucose;GO:0016239: positive regulation of macroautophagy;GO:0016239: positive regulation of macroautophagy;GO:0030308: negative regulation of cell growth;GO:0030330: DNA damage response, signal transduction by p53 class mediator;GO:0032042: mit…	GO:0005634: nucleus;GO:0005737: cytoplasm;GO:0005739: mitochondrion;GO:0005829: cytosol;GO:1990316: Atg1/ULK1 kinase complex	GO:0005092: GDP-dissociation inhibitor activity;GO:0005515: protein binding;GO:0016684: oxidoreductase activity, acting on peroxide as acceptor;GO:0016684: oxidoreductase activity, acting on peroxide as acceptor;GO:0032542: sulfiredoxin activity;GO:0032542: sulfiredoxin activity;GO:0044877: protein-containing complex binding;GO:0044877: protein-containing complex binding;GO:0070728: leucine bindi…
ENSG00000164362|TERT	26.9845	2.64381	0.778015	3.39814	0.000678446	0.0217301	GO:0000723: telomere maintenance;GO:0001172: transcription, RNA-templated;GO:0006278: RNA-dependent DNA biosynthetic process;GO:0007004: telomere maintenance via telomerase;GO:0007004: telomere maintenance via telomerase;GO:0007004: telomere maintenance via telomerase;GO:0007004: telomere maintenance via telomerase;GO:0007005: mitochondrion organization;GO:0010629: negative regulation of gene exp…	GO:0000333: telomerase catalytic core complex;GO:0000333: telomerase catalytic core complex;GO:0000333: telomerase catalytic core complex;GO:0000333: telomerase catalytic core complex;GO:0000781: chromosome, telomeric region;GO:0000781: chromosome, telomeric region;GO:0000783: nuclear telomere cap complex;GO:0005634: nucleus;GO:0005654: nucleoplasm;GO:0005654: nucleoplasm;GO:0005697: telomerase h…	GO:0000049: tRNA binding;GO:0001223: transcription coactivator binding;GO:0003677: DNA binding;GO:0003720: telomerase activity;GO:0003720: telomerase activity;GO:0003721: telomerase RNA reverse transcriptase activity;GO:0003721: telomerase RNA reverse transcriptase activity;GO:0003721: telomerase RNA reverse transcriptase activity;GO:0003721: telomerase RNA reverse transcriptase activity;GO:00037…
ENSG00000234709|UPF3AP3	42.5489	2.13748	0.628975	3.39835	0.000677937	0.0217301
ENSG00000087842|PIR	1743.08	1.29503	0.381188	3.39736	0.000680392	0.0217501	GO:0006355: regulation of transcription, DNA-templated;GO:0006366: transcription by RNA polymerase II;GO:0007586: digestion;GO:0030224: monocyte differentiation;GO:0030224: monocyte differentiation	GO:0005634: nucleus;GO:0005634: nucleus;GO:0005654: nucleoplasm;GO:0005737: cytoplasm;GO:0005829: cytosol	GO:0003712: transcription coregulator activity;GO:0005515: protein binding;GO:0008127: quercetin 2,3-dioxygenase activity;GO:0008127: quercetin 2,3-dioxygenase activity;GO:0008127: quercetin 2,3-dioxygenase activity;GO:0046872: metal ion binding
ENSG00000175938|ORAI3	398.15	1.13977	0.3359	3.39318	0.00069085	0.0220416	GO:0002115: store-operated calcium entry;GO:0070588: calcium ion transmembrane transport	GO:0005886: plasma membrane;GO:0016020: membrane;GO:0016021: integral component of membrane	GO:0005515: protein binding;GO:0015279: store-operated calcium channel activity
ENSG00000121769|FABP3	124.745	1.44777	0.426779	3.39232	0.000693034	0.0220623	GO:0006631: fatty acid metabolic process;GO:0008285: negative regulation of cell population proliferation;GO:0009410: response to xenobiotic stimulus;GO:0015908: fatty acid transport;GO:0015909: long-chain fatty acid transport;GO:0015909: long-chain fatty acid transport;GO:0032365: intracellular lipid transport;GO:0032868: response to insulin;GO:0042632: cholesterol homeostasis;GO:0046320: regula…	GO:0005615: extracellular space;GO:0005615: extracellular space;GO:0005634: nucleus;GO:0005829: cytosol;GO:0005829: cytosol;GO:0016528: sarcoplasm;GO:0070062: extracellular exosome	GO:0005324: long-chain fatty acid transporter activity;GO:0005504: fatty acid binding;GO:0005515: protein binding;GO:0008092: cytoskeletal protein binding;GO:0036041: long-chain fatty acid binding;GO:0036041: long-chain fatty acid binding;GO:0050543: icosatetraenoic acid binding;GO:0070538: oleic acid binding
ENSG00000148841|ITPRIP	1521.46	-1.25269	0.369321	-3.39187	0.000694179	0.0220623	GO:0043086: negative regulation of catalytic activity;GO:1902042: negative regulation of extrinsic apoptotic signaling pathway via death domain receptors	GO:0005640: nuclear outer membrane;GO:0005886: plasma membrane;GO:0016020: membrane;GO:0016020: membrane;GO:0016021: integral component of membrane	GO:0004860: protein kinase inhibitor activity;GO:0005515: protein binding
ENSG00000279518|AC083843.3	31.0654	2.61396	0.770832	3.39109	0.000696152	0.0220824
ENSG00000111799|COL12A1	2931.37	-1.47025	0.433728	-3.38979	0.00069946	0.0221446	GO:0007155: cell adhesion;GO:0030199: collagen fibril organization;GO:0035987: endodermal cell differentiation;GO:0035987: endodermal cell differentiation	GO:0005576: extracellular region;GO:0005576: extracellular region;GO:0005595: collagen type XII trimer;GO:0005615: extracellular space;GO:0005615: extracellular space;GO:0005788: endoplasmic reticulum lumen;GO:0062023: collagen-containing extracellular matrix;GO:0062023: collagen-containing extracellular matrix;GO:0062023: collagen-containing extracellular matrix;GO:0070062: extracellular exosome…	GO:0030020: extracellular matrix structural constituent conferring tensile strength;GO:0030020: extracellular matrix structural constituent conferring tensile strength
ENSG00000122741|DCAF10	516.672	-1.11492	0.329048	-3.38832	0.000703231	0.0222213	GO:0016567: protein ubiquitination	GO:0005654: nucleoplasm;GO:0080008: Cul4-RING E3 ubiquitin ligase complex;GO:0080008: Cul4-RING E3 ubiquitin ligase complex	GO:0005515: protein binding
ENSG00000168542|COL3A1	35.8741	2.21967	0.6552	3.38777	0.00070463	0.0222228	GO:0001501: skeletal system development;GO:0007160: cell-matrix adhesion;GO:0007179: transforming growth factor beta receptor signaling pathway;GO:0007229: integrin-mediated signaling pathway;GO:0007507: heart development;GO:0009314: response to radiation;GO:0009612: response to mechanical stimulus;GO:0018149: peptide cross-linking;GO:0021987: cerebral cortex development;GO:0030168: platelet acti…	GO:0005576: extracellular region;GO:0005576: extracellular region;GO:0005586: collagen type III trimer;GO:0005586: collagen type III trimer;GO:0005586: collagen type III trimer;GO:0005615: extracellular space;GO:0005615: extracellular space;GO:0005615: extracellular space;GO:0005788: endoplasmic reticulum lumen;GO:0031012: extracellular matrix;GO:0062023: collagen-containing extracellular matrix;…	GO:0002020: protease binding;GO:0005178: integrin binding;GO:0005178: integrin binding;GO:0005201: extracellular matrix structural constituent;GO:0005201: extracellular matrix structural constituent;GO:0005515: protein binding;GO:0030020: extracellular matrix structural constituent conferring tensile strength;GO:0030020: extracellular matrix structural constituent conferring tensile strength;GO:0…
ENSG00000228486|C2orf92	154.514	1.31221	0.387828	3.38349	0.000715717	0.0225294		GO:0016021: integral component of membrane
ENSG00000203811|H3C14	25.4178	2.6472	0.782672	3.38227	0.000718905	0.0225865	GO:0006334: nucleosome assembly	GO:0000786: nucleosome;GO:0005576: extracellular region;GO:0005634: nucleus;GO:0005634: nucleus;GO:0005634: nucleus;GO:0005654: nucleoplasm;GO:0070062: extracellular exosome	GO:0003677: DNA binding;GO:0005515: protein binding;GO:0046982: protein heterodimerization activity
ENSG00000286769|AC064869.1	23.852	2.76396	0.817825	3.37965	0.000725781	0.0227591
ENSG00000181218|H2AW	1635.28	1.02437	0.30319	3.37866	0.000728412	0.0227982	GO:0006337: nucleosome disassembly;GO:0031507: heterochromatin assembly;GO:0070914: UV-damage excision repair	GO:0000786: nucleosome;GO:0005634: nucleus;GO:0070062: extracellular exosome	GO:0003677: DNA binding;GO:0003677: DNA binding;GO:0005515: protein binding;GO:0046982: protein heterodimerization activity
ENSG00000174791|RIN1	2234.86	1.26955	0.376472	3.37224	0.000745588	0.0232474	GO:0006897: endocytosis;GO:0007165: signal transduction;GO:0050790: regulation of catalytic activity	GO:0005737: cytoplasm;GO:0005829: cytosol;GO:0005856: cytoskeleton;GO:0005886: plasma membrane	GO:0005085: guanyl-nucleotide exchange factor activity;GO:0005515: protein binding
ENSG00000185614|INKA1	170.826	1.56762	0.464823	3.37251	0.000744854	0.0232474	GO:0043086: negative regulation of catalytic activity	GO:0005634: nucleus;GO:0005634: nucleus;GO:0005737: cytoplasm	GO:0005515: protein binding;GO:0019901: protein kinase binding;GO:0019901: protein kinase binding;GO:0030291: protein serine/threonine kinase inhibitor activity;GO:0030291: protein serine/threonine kinase inhibitor activity
ENSG00000179104|TMTC2	195.445	1.43639	0.426168	3.37047	0.000750388	0.0233528	GO:0035269: protein O-linked mannosylation;GO:0055074: calcium ion homeostasis	GO:0005783: endoplasmic reticulum;GO:0005789: endoplasmic reticulum membrane;GO:0016021: integral component of membrane	GO:0000030: mannosyltransferase activity;GO:0004169: dolichyl-phosphate-mannose-protein mannosyltransferase activity;GO:0005515: protein binding
ENSG00000177990|DPY19L2	283.919	1.20631	0.358647	3.36351	0.00076958	0.0238611	GO:0007286: spermatid development;GO:0007286: spermatid development;GO:0018406: protein C-linked glycosylation via 2'-alpha-mannosyl-L-tryptophan	GO:0005634: nucleus;GO:0005637: nuclear inner membrane;GO:0016021: integral component of membrane	GO:0000030: mannosyltransferase activity
ENSG00000105866|SP4	73.0055	-1.84255	0.547807	-3.3635	0.00076962	0.0238611	GO:0006357: regulation of transcription by RNA polymerase II;GO:0006357: regulation of transcription by RNA polymerase II;GO:0006357: regulation of transcription by RNA polymerase II	GO:0000785: chromatin;GO:0005654: nucleoplasm;GO:0005829: cytosol	GO:0000978: RNA polymerase II cis-regulatory region sequence-specific DNA binding;GO:0000981: DNA-binding transcription factor activity, RNA polymerase II-specific;GO:0000981: DNA-binding transcription factor activity, RNA polymerase II-specific;GO:0005515: protein binding;GO:0042802: identical protein binding;GO:0043565: sequence-specific DNA binding;GO:0046872: metal ion binding
ENSG00000104369|JPH1	547.376	-1.17675	0.350114	-3.36106	0.000776442	0.0240274	GO:0007517: muscle organ development;GO:0060314: regulation of ryanodine-sensitive calcium-release channel activity;GO:0060402: calcium ion transport into cytosol	GO:0005654: nucleoplasm;GO:0005789: endoplasmic reticulum membrane;GO:0005886: plasma membrane;GO:0014701: junctional sarcoplasmic reticulum membrane;GO:0016021: integral component of membrane;GO:0016529: sarcoplasmic reticulum;GO:0030018: Z disc;GO:0030314: junctional membrane complex;GO:0030314: junctional membrane complex	GO:0003674: molecular_function;GO:0005515: protein binding;GO:0008307: structural constituent of muscle
ENSG00000281741|AC241377.3	57.4843	-3.60586	1.07399	-3.35743	0.000786695	0.024299
ENSG00000167799|NUDT8	917.098	1.14452	0.341165	3.35473	0.000794422	0.0244917	GO:0015938: coenzyme A catabolic process;GO:0036114: medium-chain fatty-acyl-CoA catabolic process;GO:0044580: butyryl-CoA catabolic process;GO:0046356: acetyl-CoA catabolic process;GO:1901289: succinyl-CoA catabolic process;GO:1902859: propionyl-CoA catabolic process;GO:2001294: malonyl-CoA catabolic process	GO:0005739: mitochondrion	GO:0000287: magnesium ion binding;GO:0010945: CoA pyrophosphatase activity;GO:0030145: manganese ion binding
ENSG00000143320|CRABP2	19341.8	0.95349	0.28459	3.3504	0.000806956	0.0247391	GO:0006355: regulation of transcription, DNA-templated;GO:0007165: signal transduction;GO:0008544: epidermis development;GO:0015908: fatty acid transport;GO:0035115: embryonic forelimb morphogenesis;GO:0042573: retinoic acid metabolic process;GO:0048672: positive regulation of collateral sprouting	GO:0005634: nucleus;GO:0005634: nucleus;GO:0005654: nucleoplasm;GO:0005654: nucleoplasm;GO:0005737: cytoplasm;GO:0005783: endoplasmic reticulum;GO:0005829: cytosol;GO:0005829: cytosol;GO:0005829: cytosol;GO:0070062: extracellular exosome	GO:0001972: retinoic acid binding;GO:0001972: retinoic acid binding;GO:0005501: retinoid binding;GO:0005504: fatty acid binding;GO:0005515: protein binding;GO:0016918: retinal binding;GO:0019841: retinol binding;GO:0030332: cyclin binding
ENSG00000139998|RAB15	270.745	-1.16145	0.346657	-3.35044	0.000806839	0.0247391	GO:0006904: vesicle docking involved in exocytosis;GO:0009306: protein secretion;GO:0017157: regulation of exocytosis;GO:0032482: Rab protein signal transduction;GO:0032869: cellular response to insulin stimulus;GO:0072659: protein localization to plasma membrane;GO:1903307: positive regulation of regulated secretory pathway;GO:1903307: positive regulation of regulated secretory pathway	GO:0005737: cytoplasm;GO:0005768: endosome;GO:0005794: Golgi apparatus;GO:0005886: plasma membrane;GO:0005929: cilium;GO:0008021: synaptic vesicle;GO:0010008: endosome membrane;GO:0032593: insulin-responsive compartment;GO:0048471: perinuclear region of cytoplasm;GO:0055037: recycling endosome;GO:0070062: extracellular exosome	GO:0003924: GTPase activity;GO:0005515: protein binding;GO:0005525: GTP binding
ENSG00000263809|AC135178.3	222.079	1.45372	0.433882	3.3505	0.000806653	0.0247391
ENSG00000177685|CRACR2B	2182.73	1.03963	0.310362	3.34972	0.00080892	0.0247533	GO:0002115: store-operated calcium entry;GO:0002115: store-operated calcium entry;GO:0034613: cellular protein localization;GO:2001256: regulation of store-operated calcium entry	GO:0005737: cytoplasm;GO:0005737: cytoplasm	GO:0005509: calcium ion binding;GO:0005515: protein binding
ENSG00000135678|CPM	180.035	-1.37091	0.410093	-3.34294	0.000828966	0.0252974	GO:0006518: peptide metabolic process;GO:0009653: anatomical structure morphogenesis;GO:0016485: protein processing	GO:0005576: extracellular region;GO:0005615: extracellular space;GO:0005886: plasma membrane;GO:0009986: cell surface;GO:0031225: anchored component of membrane;GO:0070062: extracellular exosome	GO:0004180: carboxypeptidase activity;GO:0004181: metallocarboxypeptidase activity;GO:0008270: zinc ion binding
ENSG00000128262|POM121L9P	51.495	1.89094	0.565785	3.34215	0.000831313	0.0252974
ENSG00000213213|CCDC183	177.426	1.29654	0.387881	3.34262	0.000829918	0.0252974
ENSG00000196139|AKR1C3	1792.78	0.994058	0.297993	3.33585	0.000850397	0.0256379	GO:0001523: retinoid metabolic process;GO:0006693: prostaglandin metabolic process;GO:0006693: prostaglandin metabolic process;GO:0006693: prostaglandin metabolic process;GO:0007186: G protein-coupled receptor signaling pathway;GO:0007584: response to nutrient;GO:0008202: steroid metabolic process;GO:0008202: steroid metabolic process;GO:0008284: positive regulation of cell population proliferati…	GO:0005634: nucleus;GO:0005737: cytoplasm;GO:0005829: cytosol;GO:0005829: cytosol;GO:0070062: extracellular exosome	GO:0001758: retinal dehydrogenase activity;GO:0004032: alditol:NADP+ 1-oxidoreductase activity;GO:0004032: alditol:NADP+ 1-oxidoreductase activity;GO:0004033: aldo-keto reductase (NADP) activity;GO:0004033: aldo-keto reductase (NADP) activity;GO:0004745: NAD-retinol dehydrogenase activity;GO:0016229: steroid dehydrogenase activity;GO:0016655: oxidoreductase activity, acting on NAD(P)H, quinone or…
ENSG00000151376|ME3	39.4281	2.10537	0.630917	3.337	0.000846876	0.0256379	GO:0006090: pyruvate metabolic process;GO:0006090: pyruvate metabolic process;GO:0006108: malate metabolic process;GO:0006108: malate metabolic process;GO:0009060: aerobic respiration;GO:0072592: oxygen metabolic process	GO:0005739: mitochondrion;GO:0005739: mitochondrion;GO:0005759: mitochondrial matrix	GO:0004470: malic enzyme activity;GO:0004470: malic enzyme activity;GO:0004471: malate dehydrogenase (decarboxylating) (NAD+) activity;GO:0004473: malate dehydrogenase (decarboxylating) (NADP+) activity;GO:0004473: malate dehydrogenase (decarboxylating) (NADP+) activity;GO:0008948: oxaloacetate decarboxylase activity;GO:0046872: metal ion binding;GO:0051287: NAD binding;GO:0070401: NADP+ binding
ENSG00000133083|DCLK1	520.137	-1.04785	0.314005	-3.33704	0.000846764	0.0256379	GO:0001764: neuron migration;GO:0006468: protein phosphorylation;GO:0007399: nervous system development;GO:0007417: central nervous system development;GO:0009615: response to virus;GO:0016197: endosomal transport;GO:0018105: peptidyl-serine phosphorylation;GO:0021952: central nervous system projection neuron axonogenesis;GO:0030900: forebrain development;GO:0035556: intracellular signal transduct…	GO:0005887: integral component of plasma membrane;GO:0014069: postsynaptic density	GO:0004672: protein kinase activity;GO:0004674: protein serine/threonine kinase activity;GO:0005524: ATP binding;GO:0106310: protein serine kinase activity
ENSG00000105173|CCNE1	867.703	-1.0089	0.302485	-3.33537	0.000851847	0.0256379	GO:0000079: regulation of cyclin-dependent protein serine/threonine kinase activity;GO:0000082: G1/S transition of mitotic cell cycle;GO:0000082: G1/S transition of mitotic cell cycle;GO:0000082: G1/S transition of mitotic cell cycle;GO:0000122: negative regulation of transcription by RNA polymerase II;GO:0000723: telomere maintenance;GO:0006270: DNA replication initiation;GO:0006468: protein pho…	GO:0000307: cyclin-dependent protein kinase holoenzyme complex;GO:0005634: nucleus;GO:0005634: nucleus;GO:0005654: nucleoplasm;GO:0005654: nucleoplasm;GO:0005737: cytoplasm;GO:0005813: centrosome;GO:0005829: cytosol;GO:0097134: cyclin E1-CDK2 complex;GO:0097134: cyclin E1-CDK2 complex	GO:0005515: protein binding;GO:0016301: kinase activity;GO:0016538: cyclin-dependent protein serine/threonine kinase regulator activity;GO:0019901: protein kinase binding
ENSG00000105270|CLIP3	2758.49	-1.05873	0.317422	-3.33542	0.000851706	0.0256379	GO:0001934: positive regulation of protein phosphorylation;GO:0010828: positive regulation of glucose transmembrane transport;GO:0018230: peptidyl-L-cysteine S-palmitoylation;GO:0031115: negative regulation of microtubule polymerization;GO:0031122: cytoplasmic microtubule organization;GO:0043065: positive regulation of apoptotic process;GO:0044091: membrane biogenesis;GO:0045444: fat cell differe…	GO:0005634: nucleus;GO:0005737: cytoplasm;GO:0005795: Golgi stack;GO:0005802: trans-Golgi network;GO:0005829: cytosol;GO:0005886: plasma membrane;GO:0005886: plasma membrane;GO:0031901: early endosome membrane;GO:0032588: trans-Golgi network membrane;GO:0032588: trans-Golgi network membrane;GO:0035371: microtubule plus-end;GO:0045121: membrane raft;GO:0055038: recycling endosome membrane	GO:0005515: protein binding;GO:0008017: microtubule binding;GO:0008017: microtubule binding;GO:0035594: ganglioside binding;GO:0051010: microtubule plus-end binding
ENSG00000171365|CLCN5	232.695	-1.28943	0.386564	-3.33562	0.000851084	0.0256379	GO:0006821: chloride transport;GO:0006897: endocytosis;GO:0007588: excretion;GO:0034220: ion transmembrane transport;GO:1902600: proton transmembrane transport	GO:0000139: Golgi membrane;GO:0005765: lysosomal membrane;GO:0005769: early endosome;GO:0005794: Golgi apparatus;GO:0005794: Golgi apparatus;GO:0005829: cytosol;GO:0005886: plasma membrane;GO:0005887: integral component of plasma membrane;GO:0008021: synaptic vesicle;GO:0010008: endosome membrane;GO:0016020: membrane;GO:0016020: membrane;GO:0045177: apical part of cell	GO:0005247: voltage-gated chloride channel activity;GO:0005254: chloride channel activity;GO:0005515: protein binding;GO:0005524: ATP binding;GO:0015297: antiporter activity;GO:0015299: solute:proton antiporter activity;GO:0042802: identical protein binding
ENSG00000121879|PIK3CA	659.317	-1.04963	0.314789	-3.33439	0.000854879	0.0256823	GO:0001525: angiogenesis;GO:0001889: liver development;GO:0001944: vasculature development;GO:0006006: glucose metabolic process;GO:0006468: protein phosphorylation;GO:0006909: phagocytosis;GO:0007173: epidermal growth factor receptor signaling pathway;GO:0010468: regulation of gene expression;GO:0010592: positive regulation of lamellipodium assembly;GO:0014065: phosphatidylinositol 3-kinase sign…	GO:0005737: cytoplasm;GO:0005829: cytosol;GO:0005886: plasma membrane;GO:0005942: phosphatidylinositol 3-kinase complex;GO:0005942: phosphatidylinositol 3-kinase complex;GO:0005943: phosphatidylinositol 3-kinase complex, class IA;GO:0005943: phosphatidylinositol 3-kinase complex, class IA;GO:0005944: phosphatidylinositol 3-kinase complex, class IB;GO:0014704: intercalated disc;GO:0016020: membran…	GO:0004674: protein serine/threonine kinase activity;GO:0005515: protein binding;GO:0005524: ATP binding;GO:0016301: kinase activity;GO:0016303: 1-phosphatidylinositol-3-kinase activity;GO:0016303: 1-phosphatidylinositol-3-kinase activity;GO:0030295: protein kinase activator activity;GO:0035004: phosphatidylinositol 3-kinase activity;GO:0035004: phosphatidylinositol 3-kinase activity;GO:0035005: …
ENSG00000166473|PKD1L2	31.0527	2.37437	0.71265	3.33174	0.000863036	0.0258801	GO:0050982: detection of mechanical stimulus;GO:0070588: calcium ion transmembrane transport	GO:0016020: membrane;GO:0016021: integral component of membrane	GO:0005262: calcium channel activity;GO:0005509: calcium ion binding;GO:0030246: carbohydrate binding
ENSG00000226688|ENTPD1-AS1	527.667	1.33281	0.400208	3.3303	0.000867518	0.0259672
ENSG00000079337|RAPGEF3	653.533	1.51965	0.456543	3.3286	0.000872838	0.026079	GO:0001525: angiogenesis;GO:0002250: adaptive immune response;GO:0007165: signal transduction;GO:0019933: cAMP-mediated signaling;GO:0032486: Rap protein signal transduction;GO:0033138: positive regulation of peptidyl-serine phosphorylation;GO:0034242: negative regulation of syncytium formation by plasma membrane fusion;GO:0043547: positive regulation of GTPase activity;GO:0045766: positive regul…	GO:0005886: plasma membrane;GO:0005886: plasma membrane;GO:0005902: microvillus;GO:0012505: endomembrane system;GO:0016020: membrane;GO:0030027: lamellipodium;GO:0030175: filopodium;GO:0030864: cortical actin cytoskeleton;GO:0070062: extracellular exosome	GO:0005085: guanyl-nucleotide exchange factor activity;GO:0005085: guanyl-nucleotide exchange factor activity;GO:0005515: protein binding;GO:0019904: protein domain specific binding;GO:0030552: cAMP binding
ENSG00000189171|S100A13	12790.4	1.27117	0.382418	3.32403	0.000887272	0.0264622	GO:0001819: positive regulation of cytokine production;GO:0008284: positive regulation of cell population proliferation;GO:0015031: protein transport;GO:0032730: positive regulation of interleukin-1 alpha production;GO:0043123: positive regulation of I-kappaB kinase/NF-kappaB signaling;GO:0043123: positive regulation of I-kappaB kinase/NF-kappaB signaling;GO:0043303: mast cell degranulation	GO:0005576: extracellular region;GO:0005615: extracellular space;GO:0005615: extracellular space;GO:0005634: nucleus;GO:0005654: nucleoplasm;GO:0005730: nucleolus;GO:0005737: cytoplasm;GO:0005829: cytosol;GO:0005886: plasma membrane;GO:0048471: perinuclear region of cytoplasm;GO:0048471: perinuclear region of cytoplasm	GO:0005507: copper ion binding;GO:0005509: calcium ion binding;GO:0005509: calcium ion binding;GO:0005515: protein binding;GO:0008270: zinc ion binding;GO:0008289: lipid binding;GO:0017134: fibroblast growth factor binding;GO:0042803: protein homodimerization activity;GO:0048306: calcium-dependent protein binding;GO:0050786: RAGE receptor binding;GO:0050786: RAGE receptor binding
ENSG00000164953|TMEM67	670.572	1.05827	0.318502	3.32265	0.000891662	0.0265451	GO:0010826: negative regulation of centrosome duplication;GO:0030433: ubiquitin-dependent ERAD pathway;GO:0060271: cilium assembly;GO:0060271: cilium assembly;GO:0060271: cilium assembly	GO:0005789: endoplasmic reticulum membrane;GO:0005813: centrosome;GO:0016021: integral component of membrane;GO:0030659: cytoplasmic vesicle membrane;GO:0035869: ciliary transition zone;GO:0035869: ciliary transition zone;GO:0036038: MKS complex;GO:0060170: ciliary membrane;GO:0060170: ciliary membrane	GO:0005515: protein binding;GO:0031005: filamin binding;GO:0051082: unfolded protein binding
ENSG00000105792|CFAP69	220.506	1.25362	0.377547	3.32044	0.000898751	0.0266616	GO:0007288: sperm axoneme assembly;GO:0007608: sensory perception of smell;GO:0030317: flagellated sperm motility;GO:0042048: olfactory behavior;GO:0042048: olfactory behavior;GO:1902093: positive regulation of flagellated sperm motility;GO:1902093: positive regulation of flagellated sperm motility;GO:1905516: positive regulation of fertilization;GO:1990834: response to odorant;GO:1990834: respon…	GO:0005737: cytoplasm;GO:0097225: sperm midpiece;GO:0097225: sperm midpiece;GO:0097730: non-motile cilium;GO:0097730: non-motile cilium
ENSG00000284707|AC079781.5	376.395	-1.11259	0.335074	-3.32042	0.000898815	0.0266616
ENSG00000260927|AC009107.2	108.108	1.71036	0.515351	3.31882	0.000903988	0.0267188
ENSG00000127418|FGFRL1	1808.17	-1.04194	0.313905	-3.3193	0.000902442	0.0267188	GO:0001501: skeletal system development;GO:0003179: heart valve morphogenesis;GO:0008285: negative regulation of cell population proliferation;GO:0008543: fibroblast growth factor receptor signaling pathway;GO:0060412: ventricular septum morphogenesis;GO:0060539: diaphragm development;GO:0098742: cell-cell adhesion via plasma-membrane adhesion molecules	GO:0005794: Golgi apparatus;GO:0005886: plasma membrane;GO:0005886: plasma membrane;GO:0005886: plasma membrane;GO:0016021: integral component of membrane;GO:0030133: transport vesicle;GO:0044291: cell-cell contact zone	GO:0005007: fibroblast growth factor-activated receptor activity;GO:0005007: fibroblast growth factor-activated receptor activity;GO:0008201: heparin binding;GO:0008201: heparin binding;GO:0017134: fibroblast growth factor binding;GO:0042802: identical protein binding
ENSG00000143850|PLEKHA6	501.576	1.32962	0.400727	3.31801	0.000906611	0.0267483			GO:0005515: protein binding
ENSG00000260914|AC026464.4	124.3	-1.47009	0.443228	-3.31677	0.000910651	0.0267975
ENSG00000155849|ELMO1	295.72	1.39827	0.42161	3.3165	0.000911536	0.0267975	GO:0006911: phagocytosis, engulfment;GO:0006915: apoptotic process;GO:0007015: actin filament organization;GO:0016477: cell migration;GO:0016601: Rac protein signal transduction;GO:0030036: actin cytoskeleton organization;GO:0048870: cell motility;GO:0048870: cell motility;GO:0050790: regulation of catalytic activity	GO:0005737: cytoplasm;GO:0005829: cytosol;GO:0005886: plasma membrane;GO:0005886: plasma membrane;GO:0016020: membrane;GO:0032045: guanyl-nucleotide exchange factor complex;GO:0032045: guanyl-nucleotide exchange factor complex	GO:0005085: guanyl-nucleotide exchange factor activity;GO:0005515: protein binding;GO:0017124: SH3 domain binding
ENSG00000225969|ABHD11-AS1	41.8673	2.26879	0.684522	3.31442	0.000918331	0.0269492
ENSG00000281103|TRG-AS1	168	1.34556	0.407537	3.30168	0.000961079	0.0281535
ENSG00000113083|LOX	11402.9	-0.982762	0.297763	-3.30048	0.000965185	0.0282235	GO:0001649: osteoblast differentiation;GO:0001932: regulation of protein phosphorylation;GO:0006464: cellular protein modification process;GO:0007507: heart development;GO:0009410: response to xenobiotic stimulus;GO:0010468: regulation of gene expression;GO:0016202: regulation of striated muscle tissue development;GO:0017015: regulation of transforming growth factor beta receptor signaling pathwa…	GO:0005576: extracellular region;GO:0005576: extracellular region;GO:0005581: collagen trimer;GO:0005615: extracellular space;GO:0005615: extracellular space;GO:0005634: nucleus;GO:0031012: extracellular matrix	GO:0004720: protein-lysine 6-oxidase activity;GO:0004720: protein-lysine 6-oxidase activity;GO:0004720: protein-lysine 6-oxidase activity;GO:0005507: copper ion binding;GO:0005515: protein binding;GO:0005518: collagen binding
ENSG00000150457|LATS2	411.557	-1.31986	0.400004	-3.29962	0.000968173	0.0282607	GO:0000082: G1/S transition of mitotic cell cycle;GO:0000082: G1/S transition of mitotic cell cycle;GO:0006468: protein phosphorylation;GO:0009755: hormone-mediated signaling pathway;GO:0017015: regulation of transforming growth factor beta receptor signaling pathway;GO:0018105: peptidyl-serine phosphorylation;GO:0035329: hippo signaling;GO:0035329: hippo signaling;GO:0035329: hippo signaling;GO:…	GO:0000922: spindle pole;GO:0000922: spindle pole;GO:0005634: nucleus;GO:0005634: nucleus;GO:0005634: nucleus;GO:0005829: cytosol;GO:0005829: cytosol;GO:0034451: centriolar satellite	GO:0004674: protein serine/threonine kinase activity;GO:0004674: protein serine/threonine kinase activity;GO:0004674: protein serine/threonine kinase activity;GO:0004674: protein serine/threonine kinase activity;GO:0005515: protein binding;GO:0005524: ATP binding;GO:0046872: metal ion binding;GO:0106310: protein serine kinase activity
ENSG00000148943|LIN7C	308.448	-1.10781	0.336201	-3.29507	0.000983967	0.0286709	GO:0002011: morphogenesis of an epithelial sheet;GO:0006887: exocytosis;GO:0007269: neurotransmitter secretion;GO:0015031: protein transport;GO:0045199: maintenance of epithelial cell apical/basal polarity;GO:1903361: protein localization to basolateral plasma membrane	GO:0005737: cytoplasm;GO:0005886: plasma membrane;GO:0005886: plasma membrane;GO:0005911: cell-cell junction;GO:0005911: cell-cell junction;GO:0005923: bicellular tight junction;GO:0016323: basolateral plasma membrane;GO:0045202: synapse;GO:0097025: MPP7-DLG1-LIN7 complex;GO:0097025: MPP7-DLG1-LIN7 complex;GO:0098793: presynapse;GO:0098839: postsynaptic density membrane;GO:0098978: glutamatergic …	GO:0005515: protein binding;GO:0008092: cytoskeletal protein binding;GO:0019904: protein domain specific binding;GO:0030165: PDZ domain binding;GO:0097016: L27 domain binding;GO:0097016: L27 domain binding
ENSG00000119686|FLVCR2	226.12	1.22605	0.37241	3.2922	0.000994061	0.0289138	GO:0055085: transmembrane transport;GO:0097037: heme export	GO:0005886: plasma membrane;GO:0016021: integral component of membrane	GO:0015232: heme transmembrane transporter activity;GO:0015232: heme transmembrane transporter activity;GO:0020037: heme binding;GO:0020037: heme binding
ENSG00000251432|LINC02615	101.586	1.58632	0.481983	3.29124	0.000997481	0.0289621
ENSG00000172426|RSPH9	197.328	1.25077	0.380286	3.28902	0.00100537	0.0291398	GO:0003341: cilium movement;GO:0035082: axoneme assembly;GO:0035082: axoneme assembly;GO:0044458: motile cilium assembly;GO:0060294: cilium movement involved in cell motility;GO:0062177: radial spoke assembly;GO:1904158: axonemal central apparatus assembly	GO:0001534: radial spoke;GO:0005930: axoneme;GO:0005930: axoneme;GO:0005930: axoneme;GO:0005930: axoneme;GO:0031514: motile cilium;GO:0031514: motile cilium;GO:0060091: kinocilium;GO:0097729: 9+2 motile cilium	GO:0005515: protein binding
ENSG00000166016|ABTB2	1234.7	-1.03234	0.314168	-3.28595	0.00101639	0.029356	GO:0097237: cellular response to toxic substance		GO:0003674: molecular_function;GO:0046982: protein heterodimerization activity
ENSG00000240891|PLCXD2	118.11	-1.48557	0.452041	-3.28635	0.00101493	0.029356	GO:0007165: signal transduction;GO:0016042: lipid catabolic process	GO:0005634: nucleus	GO:0008081: phosphoric diester hydrolase activity
ENSG00000183628|DGCR6	613.658	1.11829	0.340488	3.28437	0.0010221	0.0294691	GO:0007155: cell adhesion;GO:0009887: animal organ morphogenesis	GO:0005634: nucleus;GO:0031012: extracellular matrix	GO:0003674: molecular_function;GO:0005515: protein binding
ENSG00000137691|CFAP300	104.706	1.47142	0.448473	3.28095	0.00103459	0.0297771		GO:0005737: cytoplasm;GO:0005856: cytoskeleton;GO:0031514: motile cilium	GO:0005515: protein binding
ENSG00000121274|TENT4B	795.129	-0.98242	0.299729	-3.27769	0.00104659	0.0300697	GO:0006364: rRNA processing;GO:0006378: mRNA polyadenylation;GO:0007049: cell cycle;GO:0010587: miRNA catabolic process;GO:0031123: RNA 3'-end processing;GO:0032211: negative regulation of telomere maintenance via telomerase;GO:0033500: carbohydrate homeostasis;GO:0043629: ncRNA polyadenylation;GO:0043630: ncRNA polyadenylation involved in polyadenylation-dependent ncRNA catabolic process;GO:0051…	GO:0005730: nucleolus;GO:0005730: nucleolus;GO:0005737: cytoplasm;GO:0031499: TRAMP complex;GO:0031499: TRAMP complex	GO:0003677: DNA binding;GO:0003723: RNA binding;GO:0003887: DNA-directed DNA polymerase activity;GO:0004652: polynucleotide adenylyltransferase activity;GO:0004652: polynucleotide adenylyltransferase activity;GO:0005515: protein binding;GO:0046872: metal ion binding;GO:0070034: telomerase RNA binding;GO:0070568: guanylyltransferase activity
ENSG00000286070|AP000356.5	86.7663	-1.94682	0.594086	-3.27699	0.00104919	0.030092
ENSG00000144893|MED12L	84.5272	-1.60791	0.490793	-3.27615	0.00105232	0.0301293	GO:0006357: regulation of transcription by RNA polymerase II;GO:0045893: positive regulation of transcription, DNA-templated	GO:0016592: mediator complex	GO:0003713: transcription coactivator activity;GO:0005515: protein binding;GO:0008013: beta-catenin binding
ENSG00000176641|RNF152	71.5965	-1.75493	0.535911	-3.27468	0.00105783	0.0302	GO:0006915: apoptotic process;GO:0010508: positive regulation of autophagy;GO:0010508: positive regulation of autophagy;GO:0016567: protein ubiquitination;GO:0034198: cellular response to amino acid starvation;GO:0034198: cellular response to amino acid starvation;GO:0070534: protein K63-linked ubiquitination;GO:0070936: protein K48-linked ubiquitination;GO:0070936: protein K48-linked ubiquitinat…	GO:0005764: lysosome;GO:0005765: lysosomal membrane;GO:0005765: lysosomal membrane;GO:0005765: lysosomal membrane;GO:0031301: integral component of organelle membrane	GO:0004842: ubiquitin-protein transferase activity;GO:0005515: protein binding;GO:0031267: small GTPase binding;GO:0046872: metal ion binding;GO:0061630: ubiquitin protein ligase activity;GO:0061630: ubiquitin protein ligase activity;GO:0061630: ubiquitin protein ligase activity
ENSG00000167578|RAB4B	688.206	1.10341	0.336971	3.27451	0.00105846	0.0302	GO:0015031: protein transport;GO:0030100: regulation of endocytosis;GO:0032482: Rab protein signal transduction;GO:0046323: glucose import	GO:0005768: endosome;GO:0005886: plasma membrane;GO:0030667: secretory granule membrane;GO:0032593: insulin-responsive compartment;GO:0032593: insulin-responsive compartment;GO:0048471: perinuclear region of cytoplasm;GO:0055037: recycling endosome	GO:0003674: molecular_function;GO:0003925: G protein activity;GO:0005515: protein binding;GO:0005525: GTP binding
ENSG00000166881|NEMP1	902.236	-1.04223	0.318337	-3.27399	0.0010604	0.030203	GO:0071763: nuclear membrane organization	GO:0005635: nuclear envelope;GO:0005635: nuclear envelope;GO:0005637: nuclear inner membrane;GO:0016021: integral component of membrane	GO:0003674: molecular_function
ENSG00000122971|ACADS	454.761	1.30705	0.399527	3.2715	0.00106977	0.0303648	GO:0006635: fatty acid beta-oxidation;GO:0033539: fatty acid beta-oxidation using acyl-CoA dehydrogenase;GO:0033539: fatty acid beta-oxidation using acyl-CoA dehydrogenase;GO:0046359: butyrate catabolic process	GO:0005634: nucleus;GO:0005654: nucleoplasm;GO:0005739: mitochondrion;GO:0005739: mitochondrion;GO:0005759: mitochondrial matrix;GO:0005759: mitochondrial matrix;GO:0005813: centrosome	GO:0003995: acyl-CoA dehydrogenase activity;GO:0003995: acyl-CoA dehydrogenase activity;GO:0003995: acyl-CoA dehydrogenase activity;GO:0003995: acyl-CoA dehydrogenase activity;GO:0004085: butyryl-CoA dehydrogenase activity;GO:0004085: butyryl-CoA dehydrogenase activity;GO:0050660: flavin adenine dinucleotide binding
ENSG00000271993|AC126118.1	17.3876	3.3788	1.03277	3.27161	0.00106938	0.0303648
ENSG00000197467|COL13A1	3394.57	0.934397	0.285703	3.27052	0.00107349	0.0304181	GO:0001501: skeletal system development;GO:0001763: morphogenesis of a branching structure;GO:0001763: morphogenesis of a branching structure;GO:0001958: endochondral ossification;GO:0007160: cell-matrix adhesion;GO:0007160: cell-matrix adhesion;GO:0030154: cell differentiation;GO:0030198: extracellular matrix organization;GO:0030199: collagen fibril organization;GO:0030903: notochord development…	GO:0005576: extracellular region;GO:0005581: collagen trimer;GO:0005600: collagen type XIII trimer;GO:0005615: extracellular space;GO:0005788: endoplasmic reticulum lumen;GO:0005886: plasma membrane;GO:0005911: cell-cell junction;GO:0031012: extracellular matrix;GO:0045211: postsynaptic membrane;GO:0062023: collagen-containing extracellular matrix	GO:0005201: extracellular matrix structural constituent;GO:0005515: protein binding;GO:0008201: heparin binding;GO:0008201: heparin binding;GO:0030020: extracellular matrix structural constituent conferring tensile strength
ENSG00000163216|SPRR2D	85.7991	-1.59021	0.486678	-3.26748	0.00108511	0.0305587	GO:0008544: epidermis development;GO:0031424: keratinization	GO:0001533: cornified envelope;GO:0005737: cytoplasm;GO:0005829: cytosol
ENSG00000140285|FGF7	56.0039	-1.79558	0.549566	-3.26728	0.00108588	0.0305587	GO:0001934: positive regulation of protein phosphorylation;GO:0007165: signal transduction;GO:0008284: positive regulation of cell population proliferation;GO:0008284: positive regulation of cell population proliferation;GO:0008543: fibroblast growth factor receptor signaling pathway;GO:0008543: fibroblast growth factor receptor signaling pathway;GO:0008544: epidermis development;GO:0009611: resp…	GO:0005576: extracellular region;GO:0005615: extracellular space;GO:0005737: cytoplasm;GO:0005794: Golgi apparatus	GO:0005104: fibroblast growth factor receptor binding;GO:0005111: type 2 fibroblast growth factor receptor binding;GO:0005515: protein binding;GO:0008083: growth factor activity;GO:0008201: heparin binding;GO:0042056: chemoattractant activity
ENSG00000118523|CCN2	812.5	-0.99793	0.305395	-3.26767	0.00108437	0.0305587	GO:0001502: cartilage condensation;GO:0001503: ossification;GO:0001525: angiogenesis;GO:0001894: tissue homeostasis;GO:0001934: positive regulation of protein phosphorylation;GO:0007155: cell adhesion;GO:0007160: cell-matrix adhesion;GO:0007165: signal transduction;GO:0007229: integrin-mediated signaling pathway;GO:0007568: aging;GO:0008284: positive regulation of cell population proliferation;GO…	GO:0005576: extracellular region;GO:0005615: extracellular space;GO:0005801: cis-Golgi network;GO:0005829: cytosol;GO:0005886: plasma membrane;GO:0005938: cell cortex;GO:0031012: extracellular matrix;GO:0048471: perinuclear region of cytoplasm;GO:0062023: collagen-containing extracellular matrix	GO:0001968: fibronectin binding;GO:0005178: integrin binding;GO:0005515: protein binding;GO:0005520: insulin-like growth factor binding;GO:0008022: protein C-terminus binding;GO:0008083: growth factor activity;GO:0008201: heparin binding
ENSG00000236939|BAALC-AS2	82.3162	1.59041	0.486666	3.26797	0.00108321	0.0305587
ENSG00000213462|ERV3-1	212.033	1.43194	0.438705	3.26401	0.00109847	0.0308603	GO:0008150: biological_process		GO:0003674: molecular_function
ENSG00000158062|UBXN11	1900.99	1.0217	0.313574	3.25826	0.001121	0.0314394	GO:0043161: proteasome-mediated ubiquitin-dependent protein catabolic process	GO:0005829: cytosol;GO:0005856: cytoskeleton	GO:0005515: protein binding;GO:0043130: ubiquitin binding
ENSG00000138587|MNS1	3820.52	1.08568	0.333454	3.25585	0.00113053	0.0316528	GO:0007288: sperm axoneme assembly;GO:0044782: cilium organization;GO:0045724: positive regulation of cilium assembly;GO:0051321: meiotic cell cycle;GO:0070986: left/right axis specification	GO:0005635: nuclear envelope;GO:0005882: intermediate filament;GO:0005930: axoneme;GO:0031514: motile cilium;GO:0036126: sperm flagellum	GO:0005515: protein binding;GO:0042802: identical protein binding
ENSG00000158887|MPZ	222.239	1.33255	0.409381	3.25503	0.0011338	0.0316904	GO:0007268: chemical synaptic transmission;GO:0042552: myelination;GO:0042552: myelination;GO:0043066: negative regulation of apoptotic process;GO:0098742: cell-cell adhesion via plasma-membrane adhesion molecules;GO:0098743: cell aggregation	GO:0005764: lysosome;GO:0005791: rough endoplasmic reticulum;GO:0005886: plasma membrane;GO:0005886: plasma membrane;GO:0005886: plasma membrane;GO:0005887: integral component of plasma membrane;GO:0016323: basolateral plasma membrane;GO:0043209: myelin sheath;GO:0045202: synapse	GO:0005198: structural molecule activity
ENSG00000198768|APCDD1L	1005.55	-1.024	0.314753	-3.25336	0.00114048	0.0317695	GO:0030178: negative regulation of Wnt signaling pathway	GO:0005886: plasma membrane;GO:0016021: integral component of membrane	GO:0005515: protein binding;GO:0017147: Wnt-protein binding
ENSG00000132561|MATN2	1824.76	0.935032	0.287405	3.25336	0.00114048	0.0317695	GO:0008150: biological_process	GO:0005576: extracellular region;GO:0031012: extracellular matrix;GO:0062023: collagen-containing extracellular matrix;GO:0062023: collagen-containing extracellular matrix;GO:0062023: collagen-containing extracellular matrix;GO:0062023: collagen-containing extracellular matrix	GO:0005201: extracellular matrix structural constituent;GO:0005201: extracellular matrix structural constituent;GO:0005509: calcium ion binding;GO:0005515: protein binding
ENSG00000105426|PTPRS	2316.21	-1.45174	0.446367	-3.25235	0.00114454	0.0318288	GO:0006470: protein dephosphorylation;GO:0006470: protein dephosphorylation;GO:0010977: negative regulation of neuron projection development;GO:0021510: spinal cord development;GO:0021549: cerebellum development;GO:0021766: hippocampus development;GO:0021987: cerebral cortex development;GO:0022038: corpus callosum development;GO:0030517: negative regulation of axon extension;GO:0032687: negative …	GO:0005829: cytosol;GO:0005886: plasma membrane;GO:0005886: plasma membrane;GO:0005887: integral component of plasma membrane;GO:0030285: integral component of synaptic vesicle membrane;GO:0030424: axon;GO:0030426: growth cone;GO:0043204: perikaryon;GO:0070062: extracellular exosome;GO:0098685: Schaffer collateral - CA1 synapse;GO:0098978: glutamatergic synapse;GO:0099056: integral component of p…	GO:0004721: phosphoprotein phosphatase activity;GO:0004725: protein tyrosine phosphatase activity;GO:0004725: protein tyrosine phosphatase activity;GO:0005515: protein binding;GO:0008201: heparin binding;GO:0035374: chondroitin sulfate binding;GO:0043395: heparan sulfate proteoglycan binding
ENSG00000151014|NOCT	184.366	-1.22569	0.377474	-3.24709	0.00116592	0.0323685	GO:0000290: deadenylation-dependent decapping of nuclear-transcribed mRNA;GO:0006366: transcription by RNA polymerase II;GO:0006739: NADP metabolic process;GO:0009991: response to extracellular stimulus;GO:0010629: negative regulation of gene expression;GO:0016311: dephosphorylation;GO:0032496: response to lipopolysaccharide;GO:0032922: circadian regulation of gene expression;GO:0033962: P-body a…	GO:0000932: P-body;GO:0005634: nucleus;GO:0005654: nucleoplasm;GO:0005737: cytoplasm;GO:0005739: mitochondrion;GO:0048471: perinuclear region of cytoplasm	GO:0000175: 3'-5'-exoribonuclease activity;GO:0003729: mRNA binding;GO:0004535: poly(A)-specific ribonuclease activity;GO:0019178: NADP phosphatase activity;GO:0046872: metal ion binding;GO:0102757: NADPH phosphatase activity
ENSG00000128849|CGNL1	351.177	1.68827	0.520561	3.24318	0.00118202	0.0327602	GO:0007015: actin filament organization;GO:0051058: negative regulation of small GTPase mediated signal transduction;GO:0051497: negative regulation of stress fiber assembly;GO:0150105: protein localization to cell-cell junction	GO:0005923: bicellular tight junction;GO:0016459: myosin complex;GO:0032991: protein-containing complex	GO:0005515: protein binding
ENSG00000100583|SAMD15	1584.85	1.03045	0.317909	3.24135	0.00118966	0.0328612
ENSG00000151090|THRB	89.8427	-1.48618	0.458472	-3.24159	0.00118866	0.0328612	GO:0000122: negative regulation of transcription by RNA polymerase II;GO:0002154: thyroid hormone mediated signaling pathway;GO:0006351: transcription, DNA-templated;GO:0007605: sensory perception of sound;GO:0007621: negative regulation of female receptivity;GO:0008016: regulation of heart contraction;GO:0008050: female courtship behavior;GO:0009755: hormone-mediated signaling pathway;GO:0030154…	GO:0000785: chromatin;GO:0005634: nucleus;GO:0005654: nucleoplasm;GO:0016604: nuclear body	GO:0000978: RNA polymerase II cis-regulatory region sequence-specific DNA binding;GO:0000981: DNA-binding transcription factor activity, RNA polymerase II-specific;GO:0001223: transcription coactivator binding;GO:0003677: DNA binding;GO:0003700: DNA-binding transcription factor activity;GO:0004879: nuclear receptor activity;GO:0004879: nuclear receptor activity;GO:0005515: protein binding;GO:0008…
ENSG00000255823|MTRNR2L8	81.634	1.55218	0.479321	3.23829	0.00120248	0.03316	GO:1900118: negative regulation of execution phase of apoptosis;GO:2000272: negative regulation of signaling receptor activity	GO:0005576: extracellular region;GO:0005737: cytoplasm	GO:0048019: receptor antagonist activity
ENSG00000137843|PAK6	75.7621	-1.77649	0.549002	-3.23586	0.00121278	0.0333878	GO:0006355: regulation of transcription, DNA-templated;GO:0006468: protein phosphorylation;GO:0006915: apoptotic process;GO:0007010: cytoskeleton organization;GO:0007612: learning;GO:0007613: memory;GO:0007626: locomotory behavior;GO:0035556: intracellular signal transduction;GO:0043408: regulation of MAPK cascade;GO:0140058: neuron projection arborization;GO:1990138: neuron projection extension	GO:0001650: fibrillar center;GO:0005654: nucleoplasm;GO:0005737: cytoplasm;GO:0005829: cytosol;GO:0030054: cell junction	GO:0004674: protein serine/threonine kinase activity;GO:0004674: protein serine/threonine kinase activity;GO:0005515: protein binding;GO:0005524: ATP binding;GO:0045296: cadherin binding;GO:0106310: protein serine kinase activity
ENSG00000186710|CFAP73	110.429	1.76647	0.546196	3.23414	0.0012201	0.0334776	GO:0003341: cilium movement;GO:0036159: inner dynein arm assembly	GO:0031514: motile cilium;GO:0097545: axonemal outer doublet	GO:0070840: dynein complex binding
ENSG00000197046|SIGLEC15	1006.37	1.04935	0.324447	3.23428	0.00121949	0.0334776	GO:0032956: regulation of actin cytoskeleton organization;GO:0045124: regulation of bone resorption;GO:2001204: regulation of osteoclast development	GO:0005886: plasma membrane;GO:0005886: plasma membrane;GO:0016021: integral component of membrane;GO:0032991: protein-containing complex
ENSG00000163516|ANKZF1	4856.67	0.94268	0.291707	3.2316	0.001231	0.0336879	GO:0030433: ubiquitin-dependent ERAD pathway;GO:0070301: cellular response to hydrogen peroxide	GO:0005737: cytoplasm;GO:0016020: membrane	GO:0005515: protein binding;GO:0046872: metal ion binding
ENSG00000091879|ANGPT2	55.5954	1.99212	0.616487	3.2314	0.00123186	0.0336879	GO:0001525: angiogenesis;GO:0001666: response to hypoxia;GO:0007165: signal transduction;GO:0007281: germ cell development;GO:0009314: response to radiation;GO:0009612: response to mechanical stimulus;GO:0009749: response to glucose;GO:0010467: gene expression;GO:0010812: negative regulation of cell-substrate adhesion;GO:0014070: response to organic cyclic compound;GO:0014823: response to activit…	GO:0005576: extracellular region;GO:0005615: extracellular space;GO:0005615: extracellular space;GO:0005634: nucleus;GO:0005886: plasma membrane;GO:0042995: cell projection;GO:0062023: collagen-containing extracellular matrix	GO:0005102: signaling receptor binding;GO:0005515: protein binding;GO:0030971: receptor tyrosine kinase binding;GO:0030971: receptor tyrosine kinase binding;GO:0046872: metal ion binding
ENSG00000140939|NOL3	1769.09	0.916061	0.284277	3.22242	0.00127113	0.0347042	GO:0001666: response to hypoxia;GO:0001974: blood vessel remodeling;GO:0002931: response to ischemia;GO:0006376: mRNA splice site selection;GO:0008380: RNA splicing;GO:0010659: cardiac muscle cell apoptotic process;GO:0010667: negative regulation of cardiac muscle cell apoptotic process;GO:0010804: negative regulation of tumor necrosis factor-mediated signaling pathway;GO:0014736: negative regula…	GO:0005730: nucleolus;GO:0005739: mitochondrion;GO:0005739: mitochondrion;GO:0005829: cytosol;GO:0016020: membrane;GO:0016529: sarcoplasmic reticulum	GO:0003723: RNA binding;GO:0005123: death receptor binding;GO:0005123: death receptor binding;GO:0005509: calcium ion binding;GO:0005515: protein binding;GO:0035877: death effector domain binding;GO:0035877: death effector domain binding;GO:0042802: identical protein binding;GO:0043027: cysteine-type endopeptidase inhibitor activity involved in apoptotic process;GO:0043027: cysteine-type endopept…
ENSG00000250365|AL139353.2	85.5358	-2.49748	0.775517	-3.22041	0.00128008	0.0348907
ENSG00000177868|SVBP	998.211	1.07277	0.333513	3.21656	0.00129738	0.0351295	GO:0006508: proteolysis;GO:0009306: protein secretion;GO:0009306: protein secretion;GO:0010596: negative regulation of endothelial cell migration;GO:0031397: negative regulation of protein ubiquitination;GO:0031397: negative regulation of protein ubiquitination;GO:0061564: axon development;GO:1905048: regulation of metallopeptidase activity	GO:0005576: extracellular region;GO:0005737: cytoplasm;GO:0005856: cytoskeleton;GO:0045177: apical part of cell;GO:0045177: apical part of cell	GO:0005515: protein binding;GO:0008017: microtubule binding
ENSG00000133030|MPRIP	73539.8	-1.12839	0.350784	-3.21676	0.00129647	0.0351295	GO:0007015: actin filament organization	GO:0005829: cytosol;GO:0005925: focal adhesion;GO:0015629: actin cytoskeleton;GO:0015629: actin cytoskeleton	GO:0005515: protein binding;GO:0045296: cadherin binding;GO:0051015: actin filament binding
ENSG00000102575|ACP5	284.457	1.11628	0.347001	3.21694	0.00129567	0.0351295	GO:0016311: dephosphorylation;GO:0032496: response to lipopolysaccharide;GO:0032691: negative regulation of interleukin-1 beta production;GO:0032695: negative regulation of interleukin-12 production;GO:0032720: negative regulation of tumor necrosis factor production;GO:0032929: negative regulation of superoxide anion generation;GO:0034097: response to cytokine;GO:0045019: negative regulation of n…	GO:0005764: lysosome;GO:0005829: cytosol;GO:0016021: integral component of membrane	GO:0003993: acid phosphatase activity;GO:0008198: ferrous iron binding;GO:0008198: ferrous iron binding;GO:0008199: ferric iron binding;GO:0008199: ferric iron binding
ENSG00000163739|CXCL1	296.741	-1.15865	0.360123	-3.21737	0.0012937	0.0351295	GO:0006935: chemotaxis;GO:0006954: inflammatory response;GO:0007165: signal transduction;GO:0007186: G protein-coupled receptor signaling pathway;GO:0007399: nervous system development;GO:0008285: negative regulation of cell population proliferation;GO:0030036: actin cytoskeleton organization;GO:0030593: neutrophil chemotaxis;GO:0035556: intracellular signal transduction;GO:0050790: regulation of…	GO:0005576: extracellular region;GO:0005615: extracellular space;GO:0035580: specific granule lumen;GO:1904724: tertiary granule lumen	GO:0005102: signaling receptor binding;GO:0005515: protein binding;GO:0008009: chemokine activity;GO:0008047: enzyme activator activity;GO:0008083: growth factor activity;GO:0045236: CXCR chemokine receptor binding
ENSG00000132640|BTBD3	178.498	-1.22634	0.381374	-3.21557	0.00130186	0.0351929	GO:0021987: cerebral cortex development;GO:0021987: cerebral cortex development;GO:0022008: neurogenesis;GO:0048813: dendrite morphogenesis;GO:0048813: dendrite morphogenesis	GO:0005634: nucleus;GO:0005829: cytosol;GO:0005829: cytosol	GO:0005515: protein binding;GO:0042802: identical protein binding
ENSG00000173992|CCS	2762.7	1.04457	0.325438	3.20975	0.00132849	0.0358541	GO:0006801: superoxide metabolic process;GO:0015680: protein maturation by copper ion transfer;GO:0019430: removal of superoxide radicals;GO:0034599: cellular response to oxidative stress;GO:0051353: positive regulation of oxidoreductase activity	GO:0005634: nucleus;GO:0005737: cytoplasm;GO:0005829: cytosol	GO:0004784: superoxide dismutase activity;GO:0005507: copper ion binding;GO:0005507: copper ion binding;GO:0005515: protein binding;GO:0015035: protein-disulfide reductase activity;GO:0045296: cadherin binding
ENSG00000000457|SCYL3	434.893	1.13298	0.353211	3.20767	0.00133816	0.0358692	GO:0006468: protein phosphorylation;GO:0006954: inflammatory response;GO:0016477: cell migration;GO:0021522: spinal cord motor neuron differentiation;GO:0034613: cellular protein localization;GO:0048666: neuron development	GO:0000139: Golgi membrane;GO:0005737: cytoplasm;GO:0005794: Golgi apparatus;GO:0030027: lamellipodium	GO:0005515: protein binding;GO:0005524: ATP binding;GO:0016301: kinase activity;GO:0042802: identical protein binding
ENSG00000150764|DIXDC1	1029.66	-1.22503	0.381985	-3.20701	0.00134123	0.0358692	GO:0021799: cerebral cortex radially oriented cell migration;GO:0021869: forebrain ventricular zone progenitor cell division;GO:0030177: positive regulation of Wnt signaling pathway;GO:0032956: regulation of actin cytoskeleton organization;GO:0045665: negative regulation of neuron differentiation;GO:0060070: canonical Wnt signaling pathway;GO:0060070: canonical Wnt signaling pathway;GO:0070507: r…	GO:0005829: cytosol;GO:0005829: cytosol;GO:0005856: cytoskeleton;GO:0005925: focal adhesion	GO:0003779: actin binding;GO:0005515: protein binding;GO:0019904: protein domain specific binding;GO:0043015: gamma-tubulin binding
ENSG00000172379|ARNT2	805.472	-1.55053	0.483354	-3.20785	0.00133729	0.0358692	GO:0001666: response to hypoxia;GO:0001701: in utero embryonic development;GO:0006355: regulation of transcription, DNA-templated;GO:0006357: regulation of transcription by RNA polymerase II;GO:0007417: central nervous system development;GO:0007420: brain development;GO:0008284: positive regulation of cell population proliferation;GO:0032355: response to estradiol;GO:0043066: negative regulation …	GO:0000785: chromatin;GO:0005634: nucleus;GO:0005634: nucleus;GO:0005654: nucleoplasm;GO:0005654: nucleoplasm;GO:0005667: transcription regulator complex;GO:0005737: cytoplasm;GO:0034751: aryl hydrocarbon receptor complex	GO:0000978: RNA polymerase II cis-regulatory region sequence-specific DNA binding;GO:0000981: DNA-binding transcription factor activity, RNA polymerase II-specific;GO:0000981: DNA-binding transcription factor activity, RNA polymerase II-specific;GO:0000981: DNA-binding transcription factor activity, RNA polymerase II-specific;GO:0001228: DNA-binding transcription activator activity, RNA polymeras…
ENSG00000213889|PPM1N	275.754	1.108	0.345301	3.20878	0.00133297	0.0358692	GO:0006470: protein dephosphorylation;GO:0043124: negative regulation of I-kappaB kinase/NF-kappaB signaling;GO:0090263: positive regulation of canonical Wnt signaling pathway	GO:0005634: nucleus;GO:0005829: cytosol	GO:0000287: magnesium ion binding;GO:0030145: manganese ion binding;GO:0106306: protein serine phosphatase activity;GO:0106307: protein threonine phosphatase activity
ENSG00000026297|RNASET2	1052.34	1.04042	0.324467	3.20656	0.0013433	0.0358692	GO:0006401: RNA catabolic process;GO:0006401: RNA catabolic process;GO:0045087: innate immune response;GO:0090502: RNA phosphodiester bond hydrolysis, endonucleolytic	GO:0005576: extracellular region;GO:0005576: extracellular region;GO:0005615: extracellular space;GO:0005615: extracellular space;GO:0005758: mitochondrial intermembrane space;GO:0005764: lysosome;GO:0005788: endoplasmic reticulum lumen;GO:0035578: azurophil granule lumen;GO:0043202: lysosomal lumen;GO:0070062: extracellular exosome	GO:0003723: RNA binding;GO:0004521: endoribonuclease activity;GO:0004540: ribonuclease activity;GO:0033897: ribonuclease T2 activity
ENSG00000169583|CLIC3	26.4115	2.51452	0.784232	3.20635	0.0013443	0.0358692	GO:0006749: glutathione metabolic process;GO:0006821: chloride transport;GO:0006821: chloride transport;GO:0007165: signal transduction;GO:0034220: ion transmembrane transport;GO:0034765: regulation of ion transmembrane transport	GO:0005634: nucleus;GO:0005737: cytoplasm;GO:0005737: cytoplasm;GO:0016020: membrane;GO:0016604: nuclear body;GO:0034707: chloride channel complex;GO:0070062: extracellular exosome	GO:0005244: voltage-gated ion channel activity;GO:0005254: chloride channel activity;GO:0005254: chloride channel activity;GO:0005515: protein binding
ENSG00000278817|AC007325.4	425.47	1.05701	0.329646	3.20651	0.00134354	0.0358692	GO:0007155: cell adhesion;GO:0009887: animal organ morphogenesis	GO:0005634: nucleus;GO:0031012: extracellular matrix	GO:0003674: molecular_function;GO:0005515: protein binding
ENSG00000129991|TNNI3	151.215	1.51996	0.474531	3.20308	0.00135965	0.0361847	GO:0001570: vasculogenesis;GO:0001980: regulation of systemic arterial blood pressure by ischemic conditions;GO:0003009: skeletal muscle contraction;GO:0006874: cellular calcium ion homeostasis;GO:0006936: muscle contraction;GO:0006940: regulation of smooth muscle contraction;GO:0007507: heart development;GO:0010882: regulation of cardiac muscle contraction by calcium ion signaling;GO:0032780: ne…	GO:0005829: cytosol;GO:0005861: troponin complex;GO:0005861: troponin complex;GO:0030017: sarcomere;GO:0097512: cardiac myofibril;GO:1990584: cardiac Troponin complex	GO:0003779: actin binding;GO:0005515: protein binding;GO:0019855: calcium channel inhibitor activity;GO:0019901: protein kinase binding;GO:0019904: protein domain specific binding;GO:0030172: troponin C binding;GO:0031014: troponin T binding;GO:0046872: metal ion binding;GO:0048306: calcium-dependent protein binding;GO:0051015: actin filament binding
ENSG00000185222|TCEAL9	54980	1.08762	0.339575	3.2029	0.00136053	0.0361847		GO:0005634: nucleus	GO:0050699: WW domain binding
ENSG00000013441|CLK1	2447.29	0.908425	0.283769	3.20129	0.00136814	0.0363286	GO:0018105: peptidyl-serine phosphorylation;GO:0018107: peptidyl-threonine phosphorylation;GO:0018108: peptidyl-tyrosine phosphorylation;GO:0043484: regulation of RNA splicing;GO:0046777: protein autophosphorylation	GO:0005634: nucleus;GO:0005737: cytoplasm	GO:0004674: protein serine/threonine kinase activity;GO:0004674: protein serine/threonine kinase activity;GO:0004712: protein serine/threonine/tyrosine kinase activity;GO:0004714: transmembrane receptor protein tyrosine kinase activity;GO:0004715: non-membrane spanning protein tyrosine kinase activity;GO:0005515: protein binding;GO:0005524: ATP binding;GO:0106310: protein serine kinase activity
ENSG00000223764|LINC02593	273.62	1.31114	0.409894	3.19873	0.00138034	0.0365432
ENSG00000114315|HES1	492.25	-1.11508	0.348608	-3.19866	0.00138067	0.0365432	GO:0000122: negative regulation of transcription by RNA polymerase II;GO:0001889: liver development;GO:0003143: embryonic heart tube morphogenesis;GO:0003151: outflow tract morphogenesis;GO:0003266: regulation of secondary heart field cardioblast proliferation;GO:0003281: ventricular septum development;GO:0006357: regulation of transcription by RNA polymerase II;GO:0007155: cell adhesion;GO:00072…	GO:0005634: nucleus;GO:0005634: nucleus;GO:0005654: nucleoplasm;GO:0005654: nucleoplasm;GO:0005737: cytoplasm;GO:0032991: protein-containing complex	GO:0000978: RNA polymerase II cis-regulatory region sequence-specific DNA binding;GO:0000981: DNA-binding transcription factor activity, RNA polymerase II-specific;GO:0001227: DNA-binding transcription repressor activity, RNA polymerase II-specific;GO:0003677: DNA binding;GO:0005515: protein binding;GO:0042803: protein homodimerization activity;GO:0042826: histone deacetylase binding;GO:0043398: …
ENSG00000170185|USP38	253.424	-1.14575	0.358937	-3.19207	0.00141257	0.0373278	GO:0006511: ubiquitin-dependent protein catabolic process;GO:0016579: protein deubiquitination;GO:0016579: protein deubiquitination	GO:0005634: nucleus;GO:0005829: cytosol	GO:0004197: cysteine-type endopeptidase activity;GO:0004843: thiol-dependent deubiquitinase;GO:0004843: thiol-dependent deubiquitinase;GO:0005515: protein binding
ENSG00000053371|AKR7A2	2809.38	1.05954	0.332186	3.1896	0.0014247	0.0375879	GO:0005975: carbohydrate metabolic process;GO:0006081: cellular aldehyde metabolic process;GO:0022900: electron transport chain;GO:0044597: daunorubicin metabolic process;GO:0044598: doxorubicin metabolic process	GO:0005737: cytoplasm;GO:0005794: Golgi apparatus;GO:0005829: cytosol;GO:0005829: cytosol;GO:0070062: extracellular exosome	GO:0004032: alditol:NADP+ 1-oxidoreductase activity;GO:0004033: aldo-keto reductase (NADP) activity;GO:0005515: protein binding;GO:0009055: electron transfer activity;GO:0019119: phenanthrene-9,10-epoxide hydrolase activity;GO:0047834: D-threo-aldose 1-dehydrogenase activity
ENSG00000144749|LRIG1	2324	-0.948945	0.29763	-3.18834	0.00143091	0.0376913	GO:0007605: sensory perception of sound;GO:0022405: hair cycle process;GO:0032474: otolith morphogenesis;GO:0060384: innervation	GO:0005615: extracellular space;GO:0005886: plasma membrane;GO:0016021: integral component of membrane;GO:0031012: extracellular matrix	GO:0005515: protein binding
ENSG00000275405|U1	40.6333	2.90104	0.910785	3.18521	0.0014465	0.0380411
ENSG00000121716|PILRB	586.45	1.15398	0.362691	3.18172	0.00146403	0.0384408	GO:0007169: transmembrane receptor protein tyrosine kinase signaling pathway;GO:0007171: activation of transmembrane receptor protein tyrosine kinase activity	GO:0005886: plasma membrane;GO:0005887: integral component of plasma membrane	GO:0005515: protein binding;GO:0042288: MHC class I protein binding
ENSG00000189060|H1-0	8519.3	-0.951859	0.299223	-3.1811	0.00146717	0.0384618	GO:0000122: negative regulation of transcription by RNA polymerase II;GO:0006334: nucleosome assembly;GO:0016584: nucleosome positioning;GO:0030261: chromosome condensation;GO:0045910: negative regulation of DNA recombination;GO:2000679: positive regulation of transcription regulatory region DNA binding	GO:0000785: chromatin;GO:0000786: nucleosome;GO:0000791: euchromatin;GO:0005634: nucleus;GO:0005634: nucleus;GO:0005654: nucleoplasm;GO:0005654: nucleoplasm;GO:0005794: Golgi apparatus;GO:0015629: actin cytoskeleton;GO:0016604: nuclear body;GO:0017053: transcription repressor complex	GO:0003680: minor groove of adenine-thymine-rich DNA binding;GO:0003690: double-stranded DNA binding;GO:0003723: RNA binding;GO:0005515: protein binding;GO:0031490: chromatin DNA binding;GO:0031492: nucleosomal DNA binding
ENSG00000164741|DLC1	1526.84	-1.08345	0.341027	-3.17702	0.00148799	0.0389455	GO:0001843: neural tube closure;GO:0003007: heart morphogenesis;GO:0006915: apoptotic process;GO:0006919: activation of cysteine-type endopeptidase activity involved in apoptotic process;GO:0007165: signal transduction;GO:0008285: negative regulation of cell population proliferation;GO:0008285: negative regulation of cell population proliferation;GO:0008360: regulation of cell shape;GO:0021575: h…	GO:0005634: nucleus;GO:0005737: cytoplasm;GO:0005829: cytosol;GO:0005829: cytosol;GO:0005901: caveola;GO:0005925: focal adhesion;GO:0005925: focal adhesion;GO:0030864: cortical actin cytoskeleton;GO:0032587: ruffle membrane;GO:0045121: membrane raft	GO:0005096: GTPase activator activity;GO:0005096: GTPase activator activity;GO:0005096: GTPase activator activity;GO:0005096: GTPase activator activity;GO:0005096: GTPase activator activity;GO:0005515: protein binding;GO:0008289: lipid binding;GO:0042169: SH2 domain binding
ENSG00000204147|ASAH2B	870.45	-1.01152	0.318515	-3.17574	0.00149456	0.0389934	GO:0042759: long-chain fatty acid biosynthetic process;GO:0046512: sphingosine biosynthetic process;GO:0046514: ceramide catabolic process	GO:0005576: extracellular region	GO:0017040: N-acylsphingosine amidohydrolase activity
ENSG00000115685|PPP1R7	16591.9	0.882581	0.277908	3.1758	0.00149421	0.0389934	GO:0035307: positive regulation of protein dephosphorylation;GO:0050790: regulation of catalytic activity	GO:0005634: nucleus;GO:0005694: chromosome;GO:0005737: cytoplasm;GO:0070062: extracellular exosome	GO:0005515: protein binding;GO:0019888: protein phosphatase regulator activity;GO:0030234: enzyme regulator activity
ENSG00000139190|VAMP1	612.916	0.971843	0.306457	3.17122	0.00151802	0.0394805	GO:0006906: vesicle fusion;GO:0035493: SNARE complex assembly	GO:0005741: mitochondrial outer membrane;GO:0005829: cytosol;GO:0005829: cytosol;GO:0005886: plasma membrane;GO:0005887: integral component of plasma membrane;GO:0030285: integral component of synaptic vesicle membrane;GO:0030672: synaptic vesicle membrane;GO:0031201: SNARE complex;GO:0035577: azurophil granule membrane;GO:0035579: specific granule membrane;GO:0043005: neuron projection;GO:007082…	GO:0005484: SNAP receptor activity;GO:0005515: protein binding;GO:0019905: syntaxin binding
ENSG00000285943|AC112128.1	438.671	1.23862	0.390569	3.17133	0.00151745	0.0394805
ENSG00000105289|TJP3	21.0581	2.67927	0.845484	3.16892	0.00153009	0.0397316	GO:0035633: maintenance of blood-brain barrier;GO:0045216: cell-cell junction organization;GO:0090557: establishment of endothelial intestinal barrier;GO:0098609: cell-cell adhesion;GO:0150105: protein localization to cell-cell junction;GO:1905605: positive regulation of blood-brain barrier permeability	GO:0005634: nucleus;GO:0005654: nucleoplasm;GO:0005886: plasma membrane;GO:0005886: plasma membrane;GO:0005923: bicellular tight junction;GO:0005923: bicellular tight junction;GO:0030054: cell junction	GO:0005515: protein binding;GO:0050839: cell adhesion molecule binding
ENSG00000248592|STIMATE-MUSTN1	391.163	-1.54659	0.48818	-3.16808	0.0015345	0.0397834
ENSG00000071051|NCK2	2751.53	-0.937686	0.296023	-3.16762	0.00153695	0.0397843	GO:0001771: immunological synapse formation;GO:0007015: actin filament organization;GO:0007165: signal transduction;GO:0007172: signal complex assembly;GO:0007173: epidermal growth factor receptor signaling pathway;GO:0007176: regulation of epidermal growth factor-activated receptor activity;GO:0008285: negative regulation of cell population proliferation;GO:0016477: cell migration;GO:0030032: la…	GO:0005737: cytoplasm;GO:0005737: cytoplasm;GO:0005783: endoplasmic reticulum;GO:0005829: cytosol;GO:0012506: vesicle membrane;GO:0014069: postsynaptic density	GO:0001784: phosphotyrosine residue binding;GO:0005515: protein binding;GO:0008093: cytoskeletal anchor activity;GO:0030159: signaling receptor complex adaptor activity;GO:0030971: receptor tyrosine kinase binding;GO:0035591: signaling adaptor activity;GO:0035591: signaling adaptor activity;GO:0044877: protein-containing complex binding;GO:0097110: scaffold protein binding
ENSG00000261659|Z92544.1	19.4677	2.98659	0.942996	3.16713	0.0015395	0.0397878
ENSG00000251144|AC113346.1	713.178	1.00977	0.319153	3.1639	0.00155673	0.0400595
ENSG00000155530|LRGUK	74.593	1.52534	0.482125	3.16379	0.00155732	0.0400595	GO:0007283: spermatogenesis;GO:0016310: phosphorylation;GO:0030154: cell differentiation;GO:0035082: axoneme assembly;GO:0046037: GMP metabolic process;GO:0046710: GDP metabolic process	GO:0001669: acrosomal vesicle;GO:0002177: manchette;GO:0005829: cytosol;GO:0042995: cell projection	GO:0004385: guanylate kinase activity;GO:0005515: protein binding;GO:0005524: ATP binding
ENSG00000179388|EGR3	50.0544	-1.80377	0.570062	-3.16416	0.00155533	0.0400595	GO:0001938: positive regulation of endothelial cell proliferation;GO:0002042: cell migration involved in sprouting angiogenesis;GO:0006357: regulation of transcription by RNA polymerase II;GO:0007274: neuromuscular synaptic transmission;GO:0007422: peripheral nervous system development;GO:0007517: muscle organ development;GO:0007623: circadian rhythm;GO:0033089: positive regulation of T cell diff…	GO:0000785: chromatin;GO:0005654: nucleoplasm;GO:0045202: synapse	GO:0000978: RNA polymerase II cis-regulatory region sequence-specific DNA binding;GO:0000981: DNA-binding transcription factor activity, RNA polymerase II-specific;GO:0000981: DNA-binding transcription factor activity, RNA polymerase II-specific;GO:0001228: DNA-binding transcription activator activity, RNA polymerase II-specific;GO:0003700: DNA-binding transcription factor activity;GO:0046872: me…
ENSG00000205562|AL049775.1	101.479	-1.4055	0.444665	-3.1608	0.00157335	0.040346
ENSG00000038427|VCAN	7279.1	-1.43255	0.453174	-3.16116	0.00157144	0.040346	GO:0001501: skeletal system development;GO:0001649: osteoblast differentiation;GO:0007155: cell adhesion;GO:0007275: multicellular organism development;GO:0007417: central nervous system development;GO:0008037: cell recognition	GO:0001750: photoreceptor outer segment;GO:0005576: extracellular region;GO:0005576: extracellular region;GO:0005615: extracellular space;GO:0005788: endoplasmic reticulum lumen;GO:0005796: Golgi lumen;GO:0016020: membrane;GO:0031012: extracellular matrix;GO:0033165: interphotoreceptor matrix;GO:0043202: lysosomal lumen;GO:0062023: collagen-containing extracellular matrix;GO:0062023: collagen-con…	GO:0005509: calcium ion binding;GO:0005515: protein binding;GO:0005539: glycosaminoglycan binding;GO:0005540: hyaluronic acid binding;GO:0030021: extracellular matrix structural constituent conferring compression resistance;GO:0030021: extracellular matrix structural constituent conferring compression resistance;GO:0030246: carbohydrate binding
ENSG00000076864|RAP1GAP	135.247	1.5569	0.492646	3.16029	0.00157614	0.0403546	GO:0002250: adaptive immune response;GO:0007165: signal transduction;GO:0043087: regulation of GTPase activity;GO:0043547: positive regulation of GTPase activity;GO:0045665: negative regulation of neuron differentiation;GO:0051056: regulation of small GTPase mediated signal transduction;GO:0090630: activation of GTPase activity;GO:1903697: negative regulation of microvillus assembly;GO:1904425: n…	GO:0000139: Golgi membrane;GO:0005737: cytoplasm;GO:0005769: early endosome;GO:0005829: cytosol;GO:0005829: cytosol;GO:0016020: membrane;GO:0016020: membrane;GO:0030424: axon;GO:0030425: dendrite;GO:0043025: neuronal cell body	GO:0003924: GTPase activity;GO:0005096: GTPase activator activity;GO:0005096: GTPase activator activity;GO:0005096: GTPase activator activity;GO:0005515: protein binding;GO:0031267: small GTPase binding;GO:0042803: protein homodimerization activity
ENSG00000163697|APBB2	2759.35	-1.29968	0.411502	-3.15838	0.00158646	0.0403677	GO:0000122: negative regulation of transcription by RNA polymerase II;GO:0006355: regulation of transcription, DNA-templated;GO:0006939: smooth muscle contraction;GO:0035556: intracellular signal transduction;GO:0036438: maintenance of lens transparency;GO:0045944: positive regulation of transcription by RNA polymerase II;GO:0050808: synapse organization;GO:1901988: negative regulation of cell cy…	GO:0005634: nucleus;GO:0005634: nucleus;GO:0005737: cytoplasm;GO:0005769: early endosome;GO:0005783: endoplasmic reticulum;GO:0005794: Golgi apparatus;GO:0016020: membrane;GO:0030027: lamellipodium;GO:0030426: growth cone;GO:0045202: synapse	GO:0001540: amyloid-beta binding;GO:0005515: protein binding;GO:0008134: transcription factor binding
ENSG00000270800|RPS10-NUDT3	1419.84	1.65389	0.523572	3.15886	0.0015839	0.0403677
ENSG00000164663|USP49	165.814	-1.31727	0.416938	-3.15939	0.00158097	0.0403677	GO:0000398: mRNA splicing, via spliceosome;GO:0006511: ubiquitin-dependent protein catabolic process;GO:0016579: protein deubiquitination;GO:0016579: protein deubiquitination;GO:0035616: histone H2B conserved C-terminal lysine deubiquitination	GO:0005654: nucleoplasm;GO:0005737: cytoplasm	GO:0004197: cysteine-type endopeptidase activity;GO:0004843: thiol-dependent deubiquitinase;GO:0004843: thiol-dependent deubiquitinase;GO:0005515: protein binding;GO:0008270: zinc ion binding;GO:0042393: histone binding
ENSG00000111834|RSPH4A	64.8817	1.61802	0.512293	3.15839	0.00158643	0.0403677	GO:0003341: cilium movement;GO:0003341: cilium movement;GO:0035082: axoneme assembly;GO:0035082: axoneme assembly;GO:0060294: cilium movement involved in cell motility;GO:0062177: radial spoke assembly	GO:0001534: radial spoke;GO:0005654: nucleoplasm;GO:0005730: nucleolus;GO:0005930: axoneme;GO:0005930: axoneme;GO:0005930: axoneme;GO:0031514: motile cilium	GO:0003674: molecular_function
ENSG00000167964|RAB26	63.7991	2.27968	0.722188	3.15663	0.00159604	0.0405126	GO:0017157: regulation of exocytosis;GO:0035272: exocrine system development;GO:0035272: exocrine system development;GO:0043001: Golgi to plasma membrane protein transport;GO:0045055: regulated exocytosis;GO:0099575: regulation of protein catabolic process at presynapse, modulating synaptic transmission;GO:0099575: regulation of protein catabolic process at presynapse, modulating synaptic transmi…	GO:0000139: Golgi membrane;GO:0005768: endosome;GO:0005794: Golgi apparatus;GO:0030667: secretory granule membrane;GO:0031226: intrinsic component of plasma membrane;GO:0098993: anchored component of synaptic vesicle membrane;GO:0098993: anchored component of synaptic vesicle membrane;GO:0098993: anchored component of synaptic vesicle membrane;GO:0098993: anchored component of synaptic vesicle me…	GO:0003924: GTPase activity;GO:0005515: protein binding;GO:0005525: GTP binding;GO:0005525: GTP binding;GO:0019002: GMP binding
ENSG00000035862|TIMP2	3626.69	-0.982364	0.311225	-3.15644	0.00159708	0.0405126	GO:0007417: central nervous system development;GO:0007568: aging;GO:0008285: negative regulation of cell population proliferation;GO:0009410: response to xenobiotic stimulus;GO:0009725: response to hormone;GO:0010033: response to organic substance;GO:0010951: negative regulation of endopeptidase activity;GO:0032487: regulation of Rap protein signal transduction;GO:0034097: response to cytokine;GO…	GO:0005576: extracellular region;GO:0005615: extracellular space;GO:0009986: cell surface;GO:0030426: growth cone;GO:0031012: extracellular matrix;GO:0035580: specific granule lumen;GO:0043025: neuronal cell body;GO:0062023: collagen-containing extracellular matrix;GO:1904724: tertiary granule lumen;GO:1904813: ficolin-1-rich granule lumen	GO:0002020: protease binding;GO:0002020: protease binding;GO:0005178: integrin binding;GO:0005515: protein binding;GO:0008191: metalloendopeptidase inhibitor activity;GO:0008270: zinc ion binding;GO:0030414: peptidase inhibitor activity
ENSG00000102034|ELF4	1769.03	-1.19128	0.377512	-3.15561	0.00160164	0.0405659	GO:0001787: natural killer cell proliferation;GO:0001866: NK T cell proliferation;GO:0006357: regulation of transcription by RNA polymerase II;GO:0030154: cell differentiation;GO:0045087: innate immune response;GO:0045893: positive regulation of transcription, DNA-templated;GO:0045944: positive regulation of transcription by RNA polymerase II	GO:0000785: chromatin;GO:0005634: nucleus;GO:0005654: nucleoplasm;GO:0016604: nuclear body;GO:0016605: PML body	GO:0000978: RNA polymerase II cis-regulatory region sequence-specific DNA binding;GO:0000981: DNA-binding transcription factor activity, RNA polymerase II-specific;GO:0000981: DNA-binding transcription factor activity, RNA polymerase II-specific;GO:0001228: DNA-binding transcription activator activity, RNA polymerase II-specific;GO:0005515: protein binding;GO:1990837: sequence-specific double-str…
ENSG00000139318|DUSP6	1613.68	-0.925698	0.293581	-3.15313	0.00161532	0.0408496	GO:0000165: MAPK cascade;GO:0001933: negative regulation of protein phosphorylation;GO:0009410: response to xenobiotic stimulus;GO:0014070: response to organic cyclic compound;GO:0030154: cell differentiation;GO:0035335: peptidyl-tyrosine dephosphorylation;GO:0043065: positive regulation of apoptotic process;GO:0043065: positive regulation of apoptotic process;GO:0043409: negative regulation of M…	GO:0005654: nucleoplasm;GO:0005654: nucleoplasm;GO:0005737: cytoplasm;GO:0005737: cytoplasm;GO:0005829: cytosol;GO:0005829: cytosol;GO:0005829: cytosol	GO:0004721: phosphoprotein phosphatase activity;GO:0004725: protein tyrosine phosphatase activity;GO:0005515: protein binding;GO:0008138: protein tyrosine/serine/threonine phosphatase activity;GO:0008330: protein tyrosine/threonine phosphatase activity;GO:0017017: MAP kinase tyrosine/serine/threonine phosphatase activity;GO:0017017: MAP kinase tyrosine/serine/threonine phosphatase activity;GO:010…
ENSG00000161642|ZNF385A	736.471	0.998991	0.317197	3.14943	0.0016359	0.0413065	GO:0006915: apoptotic process;GO:0006974: cellular response to DNA damage stimulus;GO:0010609: mRNA localization resulting in posttranscriptional regulation of gene expression;GO:0010609: mRNA localization resulting in posttranscriptional regulation of gene expression;GO:0035855: megakaryocyte development;GO:0045600: positive regulation of fat cell differentiation;GO:1902164: positive regulation …	GO:0000785: chromatin;GO:0005634: nucleus;GO:0005654: nucleoplasm;GO:0005730: nucleolus;GO:0005737: cytoplasm;GO:0030425: dendrite;GO:0043025: neuronal cell body;GO:0043025: neuronal cell body	GO:0002039: p53 binding;GO:0003677: DNA binding;GO:0003723: RNA binding;GO:0003730: mRNA 3'-UTR binding;GO:0003730: mRNA 3'-UTR binding;GO:0008270: zinc ion binding
ENSG00000178078|STAP2	82.8446	1.51976	0.482843	3.14752	0.00164664	0.0415139		GO:0005829: cytosol;GO:0005886: plasma membrane	GO:0005515: protein binding;GO:0035591: signaling adaptor activity
ENSG00000284934|AC048338.2	42.2038	-2.05708	0.653706	-3.1468	0.00165069	0.0415525
ENSG00000150773|PIH1D2	56.4905	1.82437	0.580078	3.14505	0.00166059	0.0417378	GO:0000492: box C/D snoRNP assembly;GO:0006364: rRNA processing	GO:0005737: cytoplasm;GO:0097255: R2TP complex;GO:1990904: ribonucleoprotein complex	GO:0005515: protein binding;GO:0031267: small GTPase binding
ENSG00000116698|SMG7	3130.65	-1.22495	0.38958	-3.14428	0.00166495	0.0417837	GO:0000184: nuclear-transcribed mRNA catabolic process, nonsense-mediated decay;GO:0000184: nuclear-transcribed mRNA catabolic process, nonsense-mediated decay;GO:0006406: mRNA export from nucleus;GO:0035303: regulation of dephosphorylation	GO:0005634: nucleus;GO:0005697: telomerase holoenzyme complex;GO:0005737: cytoplasm;GO:0005829: cytosol;GO:0005829: cytosol;GO:0045111: intermediate filament cytoskeleton	GO:0005515: protein binding;GO:0042162: telomeric DNA binding;GO:0042162: telomeric DNA binding;GO:0051721: protein phosphatase 2A binding;GO:0070034: telomerase RNA binding
ENSG00000065802|ASB1	4512.24	-0.917889	0.292131	-3.14205	0.0016777	0.0420368	GO:0001818: negative regulation of cytokine production;GO:0016567: protein ubiquitination;GO:0016567: protein ubiquitination;GO:0016567: protein ubiquitination;GO:0030539: male genitalia development;GO:0035556: intracellular signal transduction	GO:0000151: ubiquitin ligase complex;GO:0000151: ubiquitin ligase complex;GO:0005829: cytosol	GO:0005515: protein binding;GO:0061630: ubiquitin protein ligase activity
ENSG00000283537|AC073264.3	135.467	1.27813	0.406838	3.14162	0.00168014	0.0420368
ENSG00000100784|RPS6KA5	198.806	-1.35801	0.432429	-3.14043	0.00168701	0.0421107	GO:0001818: negative regulation of cytokine production;GO:0006355: regulation of transcription, DNA-templated;GO:0006355: regulation of transcription, DNA-templated;GO:0006355: regulation of transcription, DNA-templated;GO:0006468: protein phosphorylation;GO:0006954: inflammatory response;GO:0007173: epidermal growth factor receptor signaling pathway;GO:0007411: axon guidance;GO:0016572: histone …	GO:0005634: nucleus;GO:0005634: nucleus;GO:0005654: nucleoplasm;GO:0005654: nucleoplasm;GO:0005654: nucleoplasm;GO:0005737: cytoplasm;GO:0005737: cytoplasm	GO:0000287: magnesium ion binding;GO:0004672: protein kinase activity;GO:0004674: protein serine/threonine kinase activity;GO:0004674: protein serine/threonine kinase activity;GO:0004674: protein serine/threonine kinase activity;GO:0004674: protein serine/threonine kinase activity;GO:0004674: protein serine/threonine kinase activity;GO:0005515: protein binding;GO:0005524: ATP binding;GO:0106310: …
ENSG00000169410|PTPN9	1194.13	-0.942017	0.299985	-3.14022	0.00168821	0.0421107	GO:0006470: protein dephosphorylation;GO:0010977: negative regulation of neuron projection development;GO:0035335: peptidyl-tyrosine dephosphorylation;GO:1903078: positive regulation of protein localization to plasma membrane	GO:0005654: nucleoplasm;GO:0005737: cytoplasm;GO:0044306: neuron projection terminus	GO:0004725: protein tyrosine phosphatase activity;GO:0004725: protein tyrosine phosphatase activity;GO:0004726: non-membrane spanning protein tyrosine phosphatase activity;GO:0005515: protein binding
ENSG00000197747|S100A10	51913.7	1.10995	0.353547	3.13945	0.00169264	0.0421459	GO:0001765: membrane raft assembly;GO:0006900: vesicle budding from membrane;GO:0009410: response to xenobiotic stimulus;GO:0043547: positive regulation of GTPase activity;GO:0051099: positive regulation of binding;GO:0051496: positive regulation of stress fiber assembly;GO:0051894: positive regulation of focal adhesion assembly;GO:0072659: protein localization to plasma membrane;GO:1900026: posi…	GO:0005576: extracellular region;GO:0005615: extracellular space;GO:0005737: cytoplasm;GO:0005783: endoplasmic reticulum;GO:0019897: extrinsic component of plasma membrane;GO:0045121: membrane raft;GO:0062023: collagen-containing extracellular matrix;GO:0070062: extracellular exosome;GO:1990665: AnxA2-p11 complex	GO:0005509: calcium ion binding;GO:0005515: protein binding;GO:0008289: lipid binding;GO:0042803: protein homodimerization activity;GO:0044325: transmembrane transporter binding;GO:0044325: transmembrane transporter binding;GO:0048306: calcium-dependent protein binding
ENSG00000213085|CFAP45	3178.99	0.975106	0.310653	3.13889	0.00169588	0.0421459	GO:0030317: flagellated sperm motility;GO:0060287: epithelial cilium movement involved in determination of left/right asymmetry;GO:0060296: regulation of cilium beat frequency involved in ciliary motility;GO:0061966: establishment of left/right asymmetry;GO:0090660: cerebrospinal fluid circulation	GO:0005576: extracellular region;GO:0005634: nucleus;GO:0005654: nucleoplasm;GO:0005930: axoneme;GO:0097728: 9+0 motile cilium;GO:0097729: 9+2 motile cilium	GO:0005515: protein binding;GO:0016208: AMP binding
ENSG00000122641|INHBA	302.719	-1.25183	0.398843	-3.13865	0.0016973	0.0421459	GO:0000082: G1/S transition of mitotic cell cycle;GO:0001541: ovarian follicle development;GO:0001541: ovarian follicle development;GO:0001942: hair follicle development;GO:0002244: hematopoietic progenitor cell differentiation;GO:0006357: regulation of transcription by RNA polymerase II;GO:0006952: defense response;GO:0007166: cell surface receptor signaling pathway;GO:0007267: cell-cell signali…	GO:0005576: extracellular region;GO:0005576: extracellular region;GO:0005615: extracellular space;GO:0043509: activin A complex;GO:0043512: inhibin A complex;GO:0048471: perinuclear region of cytoplasm	GO:0005125: cytokine activity;GO:0005125: cytokine activity;GO:0005179: hormone activity;GO:0005515: protein binding;GO:0008083: growth factor activity;GO:0017046: peptide hormone binding;GO:0034711: inhibin binding;GO:0042802: identical protein binding;GO:0044877: protein-containing complex binding;GO:0070699: type II activin receptor binding
ENSG00000089091|DZANK1	161.024	1.28072	0.408714	3.13352	0.00172721	0.042824	GO:0042462: eye photoreceptor cell development		GO:0046872: metal ion binding
ENSG00000183833|CFAP91	571.626	0.991846	0.31686	3.13023	0.00174668	0.0432416	GO:0003341: cilium movement	GO:0005739: mitochondrion;GO:0005930: axoneme;GO:0031514: motile cilium	GO:0005515: protein binding
ENSG00000184602|SNN	423.397	1.10343	0.353163	3.12443	0.0017815	0.0440373	GO:0009636: response to toxic substance	GO:0005737: cytoplasm;GO:0005741: mitochondrial outer membrane;GO:0016021: integral component of membrane;GO:0016021: integral component of membrane	GO:0046872: metal ion binding
ENSG00000023839|ABCC2	4742.07	0.931198	0.298236	3.12235	0.00179411	0.0442825	GO:0006855: xenobiotic transmembrane transport;GO:0006954: inflammatory response;GO:0006979: response to oxidative stress;GO:0007565: female pregnancy;GO:0009408: response to heat;GO:0010629: negative regulation of gene expression;GO:0015694: mercury ion transport;GO:0015698: inorganic anion transport;GO:0015721: bile acid and bile salt transport;GO:0015722: canalicular bile acid transport;GO:001…	GO:0005886: plasma membrane;GO:0005887: integral component of plasma membrane;GO:0009986: cell surface;GO:0009986: cell surface;GO:0016020: membrane;GO:0016324: apical plasma membrane;GO:0016324: apical plasma membrane;GO:0031526: brush border membrane;GO:0046581: intercellular canaliculus;GO:0046691: intracellular canaliculus	GO:0005515: protein binding;GO:0005524: ATP binding;GO:0008514: organic anion transmembrane transporter activity;GO:0008559: ABC-type xenobiotic transporter activity;GO:0015127: bilirubin transmembrane transporter activity;GO:0015127: bilirubin transmembrane transporter activity;GO:0015431: ABC-type glutathione S-conjugate transporter activity;GO:0019904: protein domain specific binding;GO:004262…
ENSG00000103257|SLC7A5	2061.58	-1.47583	0.473108	-3.11943	0.00181201	0.0446575	GO:0002720: positive regulation of cytokine production involved in immune response;GO:0003333: amino acid transmembrane transport;GO:0010629: negative regulation of gene expression;GO:0015804: neutral amino acid transport;GO:0015823: phenylalanine transport;GO:0032729: positive regulation of interferon-gamma production;GO:0032740: positive regulation of interleukin-17 production;GO:0032753: posit…	GO:0005765: lysosomal membrane;GO:0005829: cytosol;GO:0005886: plasma membrane;GO:0005886: plasma membrane;GO:0009925: basal plasma membrane;GO:0016020: membrane;GO:0016021: integral component of membrane;GO:0016323: basolateral plasma membrane;GO:0016324: apical plasma membrane;GO:0016324: apical plasma membrane;GO:0031528: microvillus membrane;GO:0043231: intracellular membrane-bounded organell…	GO:0005515: protein binding;GO:0015171: amino acid transmembrane transporter activity;GO:0015171: amino acid transmembrane transporter activity;GO:0015171: amino acid transmembrane transporter activity;GO:0015173: aromatic amino acid transmembrane transporter activity;GO:0015175: neutral amino acid transmembrane transporter activity;GO:0015175: neutral amino acid transmembrane transporter activit…
ENSG00000159335|PTMS	18491.5	1.03477	0.331868	3.11803	0.00182063	0.0448028	GO:0002376: immune system process;GO:0006260: DNA replication	GO:0005634: nucleus
ENSG00000110435|PDHX	1887.26	-0.884799	0.283898	-3.11661	0.00182941	0.0448845	GO:0061732: mitochondrial acetyl-CoA biosynthetic process from pyruvate	GO:0005739: mitochondrion;GO:0005759: mitochondrial matrix;GO:0045254: pyruvate dehydrogenase complex;GO:0045254: pyruvate dehydrogenase complex	GO:0005515: protein binding;GO:0016746: acyltransferase activity;GO:0034604: pyruvate dehydrogenase (NAD+) activity
ENSG00000114019|AMOTL2	1931.83	-1.18344	0.379683	-3.11693	0.00182746	0.0448845	GO:0001525: angiogenesis;GO:0003365: establishment of cell polarity involved in ameboidal cell migration;GO:0016055: Wnt signaling pathway;GO:0030036: actin cytoskeleton organization;GO:0030334: regulation of cell migration;GO:0035329: hippo signaling	GO:0005829: cytosol;GO:0005886: plasma membrane;GO:0005923: bicellular tight junction;GO:0031410: cytoplasmic vesicle;GO:0055037: recycling endosome	GO:0005515: protein binding
ENSG00000253910|PCDHGB2	189.633	1.67616	0.538614	3.11199	0.00185834	0.0455265	GO:0007155: cell adhesion;GO:0007156: homophilic cell adhesion via plasma membrane adhesion molecules	GO:0005887: integral component of plasma membrane	GO:0005509: calcium ion binding
ENSG00000159403|C1R	3072.76	0.877293	0.282028	3.11066	0.00186668	0.045663	GO:0006955: immune response;GO:0006958: complement activation, classical pathway;GO:0031638: zymogen activation;GO:0031638: zymogen activation;GO:0045087: innate immune response	GO:0005576: extracellular region;GO:0005576: extracellular region;GO:0005615: extracellular space;GO:0005615: extracellular space;GO:0070062: extracellular exosome;GO:0072562: blood microparticle;GO:0072562: blood microparticle	GO:0004252: serine-type endopeptidase activity;GO:0004252: serine-type endopeptidase activity;GO:0005509: calcium ion binding;GO:0005515: protein binding;GO:0008236: serine-type peptidase activity;GO:0042802: identical protein binding
ENSG00000173846|PLK3	513.406	-1.0802	0.347415	-3.10924	0.00187571	0.0458157	GO:0000082: G1/S transition of mitotic cell cycle;GO:0000086: G2/M transition of mitotic cell cycle;GO:0000122: negative regulation of transcription by RNA polymerase II;GO:0000278: mitotic cell cycle;GO:0000302: response to reactive oxygen species;GO:0006468: protein phosphorylation;GO:0006915: apoptotic process;GO:0006970: response to osmotic stress;GO:0006974: cellular response to DNA damage s…	GO:0000922: spindle pole;GO:0005634: nucleus;GO:0005634: nucleus;GO:0005654: nucleoplasm;GO:0005730: nucleolus;GO:0005737: cytoplasm;GO:0005737: cytoplasm;GO:0005795: Golgi stack;GO:0005813: centrosome;GO:0005813: centrosome;GO:0030425: dendrite;GO:0043025: neuronal cell body	GO:0002039: p53 binding;GO:0004674: protein serine/threonine kinase activity;GO:0004674: protein serine/threonine kinase activity;GO:0004674: protein serine/threonine kinase activity;GO:0004674: protein serine/threonine kinase activity;GO:0005515: protein binding;GO:0005524: ATP binding;GO:0106310: protein serine kinase activity
ENSG00000262049|AC139530.1	136.931	1.40378	0.451955	3.10602	0.00189622	0.0462481
ENSG00000139537|CCDC65	87.4767	1.5088	0.485924	3.10502	0.00190269	0.0462831	GO:0003352: regulation of cilium movement;GO:0003352: regulation of cilium movement;GO:0060271: cilium assembly;GO:0060285: cilium-dependent cell motility;GO:0070286: axonemal dynein complex assembly	GO:0005858: axonemal dynein complex;GO:0005930: axoneme;GO:0031514: motile cilium;GO:0036064: ciliary basal body	GO:0003674: molecular_function
ENSG00000010310|GIPR	417.365	0.991743	0.31941	3.10492	0.00190328	0.0462831	GO:0002029: desensitization of G protein-coupled receptor signaling pathway;GO:0006091: generation of precursor metabolites and energy;GO:0007166: cell surface receptor signaling pathway;GO:0007188: adenylate cyclase-modulating G protein-coupled receptor signaling pathway;GO:0007189: adenylate cyclase-activating G protein-coupled receptor signaling pathway;GO:0007190: activation of adenylate cycl…	GO:0005886: plasma membrane;GO:0005886: plasma membrane;GO:0016021: integral component of membrane	GO:0004888: transmembrane signaling receptor activity;GO:0005515: protein binding;GO:0008528: G protein-coupled peptide receptor activity;GO:0016519: gastric inhibitory peptide receptor activity;GO:0016519: gastric inhibitory peptide receptor activity;GO:0017046: peptide hormone binding;GO:0017046: peptide hormone binding;GO:0120022: glucagon family peptide binding
ENSG00000128594|LRRC4	45.1889	-1.8591	0.598956	-3.1039	0.0019099	0.0463757	GO:0050804: modulation of chemical synaptic transmission;GO:0097119: postsynaptic density protein 95 clustering;GO:0099560: synaptic membrane adhesion;GO:1904861: excitatory synapse assembly	GO:0005886: plasma membrane;GO:0043197: dendritic spine;GO:0060076: excitatory synapse;GO:0098685: Schaffer collateral - CA1 synapse;GO:0098978: glutamatergic synapse;GO:0099061: integral component of postsynaptic density membrane	GO:0005515: protein binding
ENSG00000264058|AC073508.2	1390.27	-1.80564	0.581842	-3.10332	0.0019136	0.046397
ENSG00000091409|ITGA6	414.852	-1.4423	0.465279	-3.09987	0.00193605	0.0468722	GO:0007044: cell-substrate junction assembly;GO:0007229: integrin-mediated signaling pathway;GO:0010668: ectodermal cell differentiation;GO:0010811: positive regulation of cell-substrate adhesion;GO:0010976: positive regulation of neuron projection development;GO:0030335: positive regulation of cell migration;GO:0031589: cell-substrate adhesion;GO:0035878: nail development;GO:0042327: positive re…	GO:0005886: plasma membrane;GO:0005886: plasma membrane;GO:0005912: adherens junction;GO:0005925: focal adhesion;GO:0009986: cell surface;GO:0009986: cell surface;GO:0030175: filopodium;GO:0034676: integrin alpha6-beta4 complex	GO:0005515: protein binding;GO:0031994: insulin-like growth factor I binding;GO:0038132: neuregulin binding;GO:0043236: laminin binding;GO:0044877: protein-containing complex binding;GO:0045296: cadherin binding;GO:0046872: metal ion binding
ENSG00000263244|AC087190.3	982.169	4.0257	1.29931	3.09833	0.00194611	0.0470468
ENSG00000095739|BAMBI	89.2511	1.6472	0.532787	3.09167	0.00199037	0.0479263	GO:0007179: transforming growth factor beta receptor signaling pathway;GO:0008284: positive regulation of cell population proliferation;GO:0008360: regulation of cell shape;GO:0010718: positive regulation of epithelial to mesenchymal transition;GO:0016477: cell migration;GO:0030512: negative regulation of transforming growth factor beta receptor signaling pathway;GO:0030512: negative regulation o…	GO:0005737: cytoplasm;GO:0005886: plasma membrane;GO:0005886: plasma membrane;GO:0016021: integral component of membrane	GO:0005109: frizzled binding;GO:0005109: frizzled binding;GO:0005114: type II transforming growth factor beta receptor binding;GO:0005515: protein binding
ENSG00000081803|CADPS2	765.884	0.962808	0.311433	3.09154	0.00199123	0.0479263	GO:0006887: exocytosis;GO:0015031: protein transport;GO:0016079: synaptic vesicle exocytosis;GO:0045921: positive regulation of exocytosis;GO:1990504: dense core granule exocytosis	GO:0005654: nucleoplasm;GO:0030659: cytoplasmic vesicle membrane;GO:0043231: intracellular membrane-bounded organelle;GO:0098793: presynapse;GO:0098978: glutamatergic synapse	GO:0008289: lipid binding;GO:0046872: metal ion binding
ENSG00000148400|NOTCH1	306.911	-1.13866	0.368236	-3.09221	0.00198674	0.0479263	GO:0000122: negative regulation of transcription by RNA polymerase II;GO:0000122: negative regulation of transcription by RNA polymerase II;GO:0001701: in utero embryonic development;GO:0001708: cell fate specification;GO:0001837: epithelial to mesenchymal transition;GO:0001837: epithelial to mesenchymal transition;GO:0001889: liver development;GO:0001947: heart looping;GO:0002040: sprouting angi…	GO:0000139: Golgi membrane;GO:0001669: acrosomal vesicle;GO:0002193: MAML1-RBP-Jkappa- ICN1 complex;GO:0005576: extracellular region;GO:0005634: nucleus;GO:0005634: nucleus;GO:0005654: nucleoplasm;GO:0005789: endoplasmic reticulum membrane;GO:0005829: cytosol;GO:0005886: plasma membrane;GO:0005886: plasma membrane;GO:0005886: plasma membrane;GO:0005912: adherens junction;GO:0009986: cell surface;…	GO:0003713: transcription coactivator activity;GO:0004857: enzyme inhibitor activity;GO:0004888: transmembrane signaling receptor activity;GO:0005112: Notch binding;GO:0005509: calcium ion binding;GO:0005515: protein binding;GO:0019899: enzyme binding;GO:0031490: chromatin DNA binding;GO:0042802: identical protein binding
ENSG00000225614|ZNF469	28.4486	2.21963	0.718366	3.08983	0.0020027	0.048132		GO:0005634: nucleus	GO:0003677: DNA binding;GO:0046872: metal ion binding
ENSG00000099377|HSD3B7	523.216	1.01018	0.327082	3.08846	0.00201196	0.0482272	GO:0006699: bile acid biosynthetic process;GO:0035754: B cell chemotaxis	GO:0005789: endoplasmic reticulum membrane;GO:0005811: lipid droplet;GO:0016021: integral component of membrane	GO:0003854: 3-beta-hydroxy-delta5-steroid dehydrogenase activity;GO:0003854: 3-beta-hydroxy-delta5-steroid dehydrogenase activity;GO:0005515: protein binding;GO:0016616: oxidoreductase activity, acting on the CH-OH group of donors, NAD or NADP as acceptor;GO:0047016: cholest-5-ene-3-beta,7-alpha-diol 3-beta-dehydrogenase activity
ENSG00000039523|RIPOR1	4546.64	-1.09384	0.35418	-3.08838	0.00201252	0.0482272	GO:0007266: Rho protein signal transduction;GO:0009267: cellular response to starvation;GO:0009611: response to wounding;GO:0030335: positive regulation of cell migration;GO:0034067: protein localization to Golgi apparatus;GO:0051683: establishment of Golgi localization;GO:0090316: positive regulation of intracellular protein transport	GO:0005737: cytoplasm;GO:0005737: cytoplasm;GO:0005737: cytoplasm;GO:0005794: Golgi apparatus;GO:0012506: vesicle membrane;GO:0016020: membrane;GO:0070062: extracellular exosome	GO:0005515: protein binding;GO:0071889: 14-3-3 protein binding
ENSG00000130429|ARPC1B	3896.44	1.08005	0.34978	3.08779	0.00201649	0.0482298	GO:0032355: response to estradiol;GO:0034314: Arp2/3 complex-mediated actin nucleation;GO:0034314: Arp2/3 complex-mediated actin nucleation;GO:0043627: response to estrogen	GO:0005634: nucleus;GO:0005829: cytosol;GO:0005885: Arp2/3 protein complex;GO:0005885: Arp2/3 protein complex;GO:0005925: focal adhesion;GO:0015629: actin cytoskeleton;GO:0036284: tubulobulbar complex;GO:0070062: extracellular exosome	GO:0005200: structural constituent of cytoskeleton;GO:0005515: protein binding;GO:0051015: actin filament binding
ENSG00000156298|TSPAN7	134.52	-1.25935	0.407887	-3.0875	0.00201849	0.0482298		GO:0005887: integral component of plasma membrane	GO:0005515: protein binding
ENSG00000164849|GPR146	81.9794	1.97335	0.639235	3.08706	0.00202149	0.0482317	GO:0007186: G protein-coupled receptor signaling pathway	GO:0005886: plasma membrane;GO:0016021: integral component of membrane	GO:0004930: G protein-coupled receptor activity
ENSG00000110395|CBL	856.53	-1.11184	0.360241	-3.08638	0.00202611	0.0482451	GO:0000209: protein polyubiquitination;GO:0006511: ubiquitin-dependent protein catabolic process;GO:0006513: protein monoubiquitination;GO:0006974: cellular response to DNA damage stimulus;GO:0007165: signal transduction;GO:0007166: cell surface receptor signaling pathway;GO:0007173: epidermal growth factor receptor signaling pathway;GO:0007175: negative regulation of epidermal growth factor-acti…	GO:0005794: Golgi apparatus;GO:0005829: cytosol;GO:0005829: cytosol;GO:0005886: plasma membrane;GO:0005886: plasma membrane;GO:0005886: plasma membrane;GO:0005925: focal adhesion;GO:0005929: cilium;GO:0016600: flotillin complex;GO:0030426: growth cone;GO:0045121: membrane raft;GO:0048471: perinuclear region of cytoplasm	GO:0001784: phosphotyrosine residue binding;GO:0004842: ubiquitin-protein transferase activity;GO:0005154: epidermal growth factor receptor binding;GO:0005509: calcium ion binding;GO:0005515: protein binding;GO:0017124: SH3 domain binding;GO:0017124: SH3 domain binding;GO:0030971: receptor tyrosine kinase binding;GO:0036312: phosphatidylinositol 3-kinase regulatory subunit binding;GO:0045296: cad…
ENSG00000115159|GPD2	1315.65	-1.02859	0.333295	-3.08611	0.00202792	0.0482451	GO:0006072: glycerol-3-phosphate metabolic process;GO:0006127: glycerophosphate shuttle;GO:0019563: glycerol catabolic process	GO:0005739: mitochondrion;GO:0005739: mitochondrion;GO:0005743: mitochondrial inner membrane;GO:0009331: glycerol-3-phosphate dehydrogenase complex	GO:0004368: glycerol-3-phosphate dehydrogenase (quinone) activity;GO:0005509: calcium ion binding;GO:0052591: sn-glycerol-3-phosphate:ubiquinone-8 oxidoreductase activity
ENSG00000287632|AC112253.1	116.19	1.43978	0.466882	3.08383	0.00204356	0.0484772
ENSG00000146416|AIG1	2619.66	0.95092	0.308323	3.08416	0.00204126	0.0484772	GO:0042758: long-chain fatty acid catabolic process	GO:0005886: plasma membrane;GO:0012505: endomembrane system;GO:0016020: membrane;GO:0016021: integral component of membrane	GO:0005515: protein binding;GO:0016787: hydrolase activity
ENSG00000185269|NOTUM	73.2458	1.60214	0.519796	3.08225	0.00205444	0.048665	GO:0016055: Wnt signaling pathway;GO:0030178: negative regulation of Wnt signaling pathway;GO:0030500: regulation of bone mineralization;GO:0030500: regulation of bone mineralization;GO:0060348: bone development;GO:0090090: negative regulation of canonical Wnt signaling pathway;GO:1990697: protein depalmitoleylation;GO:1990697: protein depalmitoleylation	GO:0005576: extracellular region;GO:0005788: endoplasmic reticulum lumen	GO:0004629: phospholipase C activity;GO:0005515: protein binding;GO:1990699: palmitoleyl hydrolase activity;GO:1990699: palmitoleyl hydrolase activity
ENSG00000117616|RSRP1	7025.72	0.933294	0.302903	3.08117	0.00206192	0.0487695			GO:0005515: protein binding
ENSG00000187860|CCDC157	472.732	0.976059	0.316825	3.08075	0.00206477	0.0487695			GO:0005515: protein binding
ENSG00000143127|ITGA10	120.644	1.41972	0.460961	3.07991	0.00207064	0.0487781	GO:0007160: cell-matrix adhesion;GO:0007229: integrin-mediated signaling pathway	GO:0005886: plasma membrane;GO:0008305: integrin complex;GO:0034680: integrin alpha10-beta1 complex	GO:0005518: collagen binding;GO:0046872: metal ion binding;GO:0098639: collagen binding involved in cell-matrix adhesion
ENSG00000136754|ABI1	2103.49	-1.11	0.360408	-3.07985	0.00207106	0.0487781	GO:0001756: somitogenesis;GO:0007169: transmembrane receptor protein tyrosine kinase signaling pathway;GO:0008154: actin polymerization or depolymerization;GO:0008285: negative regulation of cell population proliferation;GO:0018108: peptidyl-tyrosine phosphorylation;GO:0035855: megakaryocyte development;GO:0048813: dendrite morphogenesis;GO:0061098: positive regulation of protein tyrosine kinase …	GO:0005622: intracellular anatomical structure;GO:0005634: nucleus;GO:0005783: endoplasmic reticulum;GO:0005829: cytosol;GO:0005856: cytoskeleton;GO:0014069: postsynaptic density;GO:0030027: lamellipodium;GO:0030027: lamellipodium;GO:0030426: growth cone;GO:0031209: SCAR complex;GO:0032433: filopodium tip;GO:0070062: extracellular exosome	GO:0005515: protein binding;GO:0008092: cytoskeletal protein binding;GO:0017124: SH3 domain binding;GO:0017124: SH3 domain binding;GO:0030296: protein tyrosine kinase activator activity;GO:0035591: signaling adaptor activity;GO:0035591: signaling adaptor activity;GO:0045296: cadherin binding
ENSG00000107560|RAB11FIP2	536.384	-1.23528	0.401445	-3.07708	0.00209037	0.0489849	GO:0006909: phagocytosis;GO:0030010: establishment of cell polarity;GO:0035669: TRAM-dependent toll-like receptor 4 signaling pathway;GO:0035773: insulin secretion involved in cellular response to glucose stimulus;GO:0043547: positive regulation of GTPase activity;GO:0045055: regulated exocytosis;GO:0045055: regulated exocytosis;GO:1903078: positive regulation of protein localization to plasma me…	GO:0001891: phagocytic cup;GO:0001891: phagocytic cup;GO:0005654: nucleoplasm;GO:0005768: endosome;GO:0005768: endosome;GO:0030659: cytoplasmic vesicle membrane;GO:0042995: cell projection;GO:0043231: intracellular membrane-bounded organelle;GO:0043231: intracellular membrane-bounded organelle;GO:0055038: recycling endosome membrane	GO:0005515: protein binding;GO:0019901: protein kinase binding;GO:0031267: small GTPase binding;GO:0042802: identical protein binding;GO:0042803: protein homodimerization activity
ENSG00000135363|LMO2	366.137	1.01323	0.32932	3.07674	0.0020928	0.0489849	GO:0007275: multicellular organism development;GO:0045944: positive regulation of transcription by RNA polymerase II;GO:0097067: cellular response to thyroid hormone stimulus	GO:0005654: nucleoplasm;GO:0005667: transcription regulator complex	GO:0001221: transcription coregulator binding;GO:0003713: transcription coactivator activity;GO:0005515: protein binding;GO:0043425: bHLH transcription factor binding;GO:0046872: metal ion binding;GO:0061629: RNA polymerase II-specific DNA-binding transcription factor binding
ENSG00000253797|UTP14C	226.24	-1.84413	0.599307	-3.07711	0.00209021	0.0489849	GO:0006364: rRNA processing;GO:0007283: spermatogenesis;GO:0030154: cell differentiation;GO:0051321: meiotic cell cycle	GO:0005730: nucleolus;GO:0005730: nucleolus;GO:0005829: cytosol;GO:0032040: small-subunit processome	GO:0005515: protein binding
ENSG00000109083|IFT20	3837.79	0.865724	0.281402	3.07646	0.00209472	0.0489849	GO:0001736: establishment of planar polarity;GO:0001822: kidney development;GO:0007224: smoothened signaling pathway;GO:0007283: spermatogenesis;GO:0008542: visual learning;GO:0034067: protein localization to Golgi apparatus;GO:0035845: photoreceptor cell outer segment organization;GO:0036372: opsin transport;GO:0042073: intraciliary transport;GO:0045198: establishment of epithelial cell apical/b…	GO:0000139: Golgi membrane;GO:0001750: photoreceptor outer segment;GO:0005794: Golgi apparatus;GO:0005794: Golgi apparatus;GO:0005801: cis-Golgi network;GO:0005813: centrosome;GO:0005813: centrosome;GO:0005814: centriole;GO:0005902: microvillus;GO:0005929: cilium;GO:0005929: cilium;GO:0005929: cilium;GO:0030992: intraciliary transport particle B;GO:0030992: intraciliary transport particle B;GO:00…	GO:0002046: opsin binding;GO:0005515: protein binding;GO:0031267: small GTPase binding
ENSG00000102265|TIMP1	5032.98	-1.10897	0.360345	-3.07751	0.00208737	0.0489849	GO:0001775: cell activation;GO:0002248: connective tissue replacement involved in inflammatory response wound healing;GO:0007165: signal transduction;GO:0007568: aging;GO:0008284: positive regulation of cell population proliferation;GO:0009725: response to hormone;GO:0010033: response to organic substance;GO:0010951: negative regulation of endopeptidase activity;GO:0010951: negative regulation of…	GO:0005576: extracellular region;GO:0005576: extracellular region;GO:0005604: basement membrane;GO:0005615: extracellular space;GO:0005615: extracellular space;GO:0005788: endoplasmic reticulum lumen;GO:0031012: extracellular matrix;GO:0031093: platelet alpha granule lumen;GO:0070062: extracellular exosome	GO:0002020: protease binding;GO:0005125: cytokine activity;GO:0005515: protein binding;GO:0008083: growth factor activity;GO:0008191: metalloendopeptidase inhibitor activity;GO:0008191: metalloendopeptidase inhibitor activity;GO:0008270: zinc ion binding;GO:0030414: peptidase inhibitor activity
ENSG00000226864|ATE1-AS1	168.426	-1.36709	0.444594	-3.07492	0.0021056	0.0491695
ENSG00000106004|HOXA5	52.5281	1.79014	0.582448	3.07347	0.00211586	0.0493392	GO:0003016: respiratory system process;GO:0006357: regulation of transcription by RNA polymerase II;GO:0009952: anterior/posterior pattern specification;GO:0010628: positive regulation of gene expression;GO:0016477: cell migration;GO:0016525: negative regulation of angiogenesis;GO:0030878: thyroid gland development;GO:0033599: regulation of mammary gland epithelial cell proliferation;GO:0035264: …	GO:0000785: chromatin;GO:0005634: nucleus;GO:0005634: nucleus	GO:0000978: RNA polymerase II cis-regulatory region sequence-specific DNA binding;GO:0000978: RNA polymerase II cis-regulatory region sequence-specific DNA binding;GO:0000981: DNA-binding transcription factor activity, RNA polymerase II-specific;GO:0000981: DNA-binding transcription factor activity, RNA polymerase II-specific;GO:0001228: DNA-binding transcription activator activity, RNA polymeras…
ENSG00000165379|LRFN5	159.193	-1.20548	0.392753	-3.0693	0.00214559	0.0495456	GO:0043031: negative regulation of macrophage activation;GO:0050728: negative regulation of inflammatory response;GO:0099560: synaptic membrane adhesion;GO:1905606: regulation of presynapse assembly	GO:0009986: cell surface;GO:0098978: glutamatergic synapse;GO:0098982: GABA-ergic synapse;GO:0099061: integral component of postsynaptic density membrane	GO:0005515: protein binding
ENSG00000004776|HSPB6	1604.27	0.931266	0.303358	3.06985	0.00214164	0.0495456	GO:0006937: regulation of muscle contraction;GO:0010667: negative regulation of cardiac muscle cell apoptotic process;GO:0045766: positive regulation of angiogenesis;GO:0061077: chaperone-mediated protein folding	GO:0005576: extracellular region;GO:0005634: nucleus;GO:0005730: nucleolus;GO:0005737: cytoplasm;GO:0005794: Golgi apparatus;GO:0005829: cytosol	GO:0005212: structural constituent of eye lens;GO:0042803: protein homodimerization activity;GO:0051082: unfolded protein binding;GO:0051087: chaperone binding
ENSG00000167619|TMEM145	16.1988	3.05008	0.993052	3.07143	0.00213039	0.0495456	GO:0007186: G protein-coupled receptor signaling pathway;GO:0019236: response to pheromone	GO:0016021: integral component of membrane
ENSG00000285872|AC007240.3	16.2789	-3.14826	1.02537	-3.07035	0.00213809	0.0495456
ENSG00000173531|MST1	109.48	1.47108	0.479292	3.06928	0.00214578	0.0495456	GO:0006508: proteolysis;GO:0035978: histone H2A-S139 phosphorylation;GO:0045721: negative regulation of gluconeogenesis;GO:0046425: regulation of receptor signaling pathway via JAK-STAT;GO:2000479: regulation of cAMP-dependent protein kinase activity	GO:0005576: extracellular region;GO:0005615: extracellular space;GO:0005615: extracellular space;GO:0062023: collagen-containing extracellular matrix	GO:0004175: endopeptidase activity;GO:0005102: signaling receptor binding;GO:0005515: protein binding;GO:0030971: receptor tyrosine kinase binding;GO:0030971: receptor tyrosine kinase binding
ENSG00000272886|DCP1A	521.106	-1.17969	0.38433	-3.06948	0.0021443	0.0495456	GO:0000184: nuclear-transcribed mRNA catabolic process, nonsense-mediated decay;GO:0000290: deadenylation-dependent decapping of nuclear-transcribed mRNA;GO:0031087: deadenylation-independent decapping of nuclear-transcribed mRNA;GO:0043085: positive regulation of catalytic activity;GO:0110156: methylguanosine-cap decapping;GO:1903608: protein localization to cytoplasmic stress granule	GO:0000932: P-body;GO:0000932: P-body;GO:0005634: nucleus;GO:0005737: cytoplasm;GO:0005829: cytosol;GO:0016020: membrane;GO:0036464: cytoplasmic ribonucleoprotein granule	GO:0003729: mRNA binding;GO:0005515: protein binding;GO:0008047: enzyme activator activity;GO:0016787: hydrolase activity;GO:0019894: kinesin binding;GO:0042802: identical protein binding
ENSG00000268089|GABRQ	4270.35	-1.1347	0.369624	-3.06988	0.00214143	0.0495456	GO:0006836: neurotransmitter transport;GO:0007165: signal transduction;GO:0007268: chemical synaptic transmission;GO:0034220: ion transmembrane transport;GO:0042391: regulation of membrane potential;GO:0050877: nervous system process;GO:1902476: chloride transmembrane transport	GO:0005886: plasma membrane;GO:0005887: integral component of plasma membrane;GO:0034707: chloride channel complex;GO:0043005: neuron projection;GO:0043235: receptor complex;GO:0045202: synapse;GO:0045211: postsynaptic membrane;GO:1902711: GABA-A receptor complex	GO:0004888: transmembrane signaling receptor activity;GO:0004890: GABA-A receptor activity;GO:0005230: extracellular ligand-gated ion channel activity;GO:0005254: chloride channel activity;GO:0005326: neurotransmitter transmembrane transporter activity;GO:0005515: protein binding;GO:0030594: neurotransmitter receptor activity
ENSG00000254726|MEX3A	682.949	-1.06418	0.347244	-3.06464	0.00217935	0.0502503		GO:0000932: P-body;GO:0005634: nucleus;GO:0005829: cytosol	GO:0003723: RNA binding;GO:0003723: RNA binding;GO:0046872: metal ion binding
ENSG00000075826|SEC31B	93.8079	1.60664	0.524339	3.06413	0.00218305	0.050265	GO:0006886: intracellular protein transport;GO:0007029: endoplasmic reticulum organization;GO:0090110: COPII-coated vesicle cargo loading	GO:0005789: endoplasmic reticulum membrane;GO:0030120: vesicle coat;GO:0030127: COPII vesicle coat;GO:0070971: endoplasmic reticulum exit site	GO:0005198: structural molecule activity
ENSG00000150551|LYPD1	1236.1	0.933321	0.304916	3.06092	0.00220661	0.0507367	GO:0095500: acetylcholine receptor signaling pathway;GO:2000272: negative regulation of signaling receptor activity	GO:0005576: extracellular region;GO:0005886: plasma membrane;GO:0031225: anchored component of membrane;GO:0045202: synapse	GO:0030550: acetylcholine receptor inhibitor activity
ENSG00000139329|LUM	98.8436	1.42256	0.466554	3.04908	0.0022954	0.0526313	GO:0007601: visual perception;GO:0014070: response to organic cyclic compound;GO:0030199: collagen fibril organization;GO:0032914: positive regulation of transforming growth factor beta1 production;GO:0045944: positive regulation of transcription by RNA polymerase II;GO:0051216: cartilage development;GO:0070848: response to growth factor	GO:0005576: extracellular region;GO:0005576: extracellular region;GO:0005576: extracellular region;GO:0005583: fibrillar collagen trimer;GO:0005615: extracellular space;GO:0005615: extracellular space;GO:0005796: Golgi lumen;GO:0031012: extracellular matrix;GO:0043202: lysosomal lumen;GO:0062023: collagen-containing extracellular matrix;GO:0062023: collagen-containing extracellular matrix;GO:0062…	GO:0005201: extracellular matrix structural constituent;GO:0005515: protein binding;GO:0005518: collagen binding;GO:0005518: collagen binding;GO:0030021: extracellular matrix structural constituent conferring compression resistance;GO:0030021: extracellular matrix structural constituent conferring compression resistance
ENSG00000140368|PSTPIP1	52.8073	1.86625	0.611995	3.04946	0.00229254	0.0526313	GO:0006897: endocytosis;GO:0006954: inflammatory response;GO:0007155: cell adhesion;GO:0007165: signal transduction;GO:0030041: actin filament polymerization;GO:0045087: innate immune response	GO:0001931: uropod;GO:0005737: cytoplasm;GO:0005829: cytosol;GO:0005884: actin filament;GO:0005886: plasma membrane;GO:0016020: membrane;GO:0030027: lamellipodium;GO:0032154: cleavage furrow;GO:0048471: perinuclear region of cytoplasm	GO:0005515: protein binding;GO:0042802: identical protein binding;GO:0051015: actin filament binding
ENSG00000180818|HOXC10	40.1355	2.18948	0.718932	3.04547	0.00232319	0.053025	GO:0006357: regulation of transcription by RNA polymerase II;GO:0008284: positive regulation of cell population proliferation;GO:0045944: positive regulation of transcription by RNA polymerase II;GO:0120163: negative regulation of cold-induced thermogenesis	GO:0000785: chromatin;GO:0005634: nucleus;GO:0005654: nucleoplasm;GO:0016604: nuclear body	GO:0000977: RNA polymerase II transcription regulatory region sequence-specific DNA binding;GO:0000978: RNA polymerase II cis-regulatory region sequence-specific DNA binding;GO:0000981: DNA-binding transcription factor activity, RNA polymerase II-specific;GO:0000981: DNA-binding transcription factor activity, RNA polymerase II-specific;GO:0001228: DNA-binding transcription activator activity, RNA…
ENSG00000129521|EGLN3	46.8574	-2.09616	0.688427	-3.04485	0.00232796	0.053025	GO:0001666: response to hypoxia;GO:0006915: apoptotic process;GO:0006919: activation of cysteine-type endopeptidase activity involved in apoptotic process;GO:0006974: cellular response to DNA damage stimulus;GO:0018126: protein hydroxylation;GO:0018401: peptidyl-proline hydroxylation to 4-hydroxy-L-proline;GO:0018401: peptidyl-proline hydroxylation to 4-hydroxy-L-proline;GO:0042127: regulation of…	GO:0005634: nucleus;GO:0005634: nucleus;GO:0005654: nucleoplasm;GO:0005737: cytoplasm;GO:0005737: cytoplasm;GO:0005829: cytosol;GO:0005829: cytosol	GO:0005515: protein binding;GO:0008198: ferrous iron binding;GO:0016706: 2-oxoglutarate-dependent dioxygenase activity;GO:0031418: L-ascorbic acid binding;GO:0031543: peptidyl-proline dioxygenase activity;GO:0031545: peptidyl-proline 4-dioxygenase activity;GO:0031545: peptidyl-proline 4-dioxygenase activity
ENSG00000179029|TMEM107	1643.56	0.941643	0.309191	3.0455	0.00232291	0.053025	GO:0003127: detection of nodal flow;GO:0010468: regulation of gene expression;GO:0021532: neural tube patterning;GO:0042733: embryonic digit morphogenesis;GO:0060021: roof of mouth development;GO:0060271: cilium assembly;GO:0060271: cilium assembly;GO:0097094: craniofacial suture morphogenesis;GO:1904491: protein localization to ciliary transition zone;GO:1905515: non-motile cilium assembly;GO:19…	GO:0016021: integral component of membrane;GO:0035869: ciliary transition zone;GO:0036038: MKS complex;GO:0036038: MKS complex	GO:0003674: molecular_function;GO:0005515: protein binding
ENSG00000163818|LZTFL1	496.968	0.966019	0.317129	3.04614	0.00231798	0.053025	GO:1903565: negative regulation of protein localization to cilium;GO:1903565: negative regulation of protein localization to cilium;GO:1903568: negative regulation of protein localization to ciliary membrane	GO:0005737: cytoplasm;GO:0005829: cytosol;GO:0005829: cytosol	GO:0005515: protein binding;GO:0042802: identical protein binding;GO:0044877: protein-containing complex binding
ENSG00000169064|ZBBX	56.1129	1.71077	0.561874	3.04476	0.00232868	0.053025	GO:0003341: cilium movement	GO:0031514: motile cilium	GO:0046872: metal ion binding
ENSG00000145819|ARHGAP26	1212.93	-1.16727	0.384289	-3.03747	0.00238574	0.0542492	GO:0007165: signal transduction;GO:0007399: nervous system development;GO:0030036: actin cytoskeleton organization;GO:0050790: regulation of catalytic activity;GO:0051056: regulation of small GTPase mediated signal transduction	GO:0005575: cellular_component;GO:0005829: cytosol;GO:0005856: cytoskeleton;GO:0005925: focal adhesion	GO:0005096: GTPase activator activity;GO:0005096: GTPase activator activity;GO:0005096: GTPase activator activity;GO:0005515: protein binding;GO:0005543: phospholipid binding
ENSG00000275740|AC091959.3	380.346	1.22129	0.402152	3.03688	0.00239045	0.0542812
ENSG00000259316|AC087632.2	14.7685	-4.07688	1.34408	-3.0332	0.00241973	0.0547951
ENSG00000088305|DNMT3B	248.929	-1.61803	0.533393	-3.03346	0.00241766	0.0547951	GO:0000122: negative regulation of transcription by RNA polymerase II;GO:0001666: response to hypoxia;GO:0006306: DNA methylation;GO:0006306: DNA methylation;GO:0009410: response to xenobiotic stimulus;GO:0009636: response to toxic substance;GO:0010212: response to ionizing radiation;GO:0010628: positive regulation of gene expression;GO:0014823: response to activity;GO:0031000: response to caffei…	GO:0005634: nucleus;GO:0005654: nucleoplasm;GO:0005654: nucleoplasm	GO:0003677: DNA binding;GO:0003682: chromatin binding;GO:0003714: transcription corepressor activity;GO:0003714: transcription corepressor activity;GO:0003886: DNA (cytosine-5-)-methyltransferase activity;GO:0003886: DNA (cytosine-5-)-methyltransferase activity;GO:0003886: DNA (cytosine-5-)-methyltransferase activity;GO:0005515: protein binding;GO:0009008: DNA-methyltransferase activity;GO:004282…
ENSG00000229400|CNIH3-AS1	288.07	1.02685	0.3387	3.03175	0.00243141	0.0549085
ENSG00000047644|WWC3	2124.82	-1.13984	0.375962	-3.03181	0.00243095	0.0549085	GO:0000122: negative regulation of transcription by RNA polymerase II;GO:0006355: regulation of transcription, DNA-templated;GO:0016477: cell migration;GO:0035330: regulation of hippo signaling;GO:0035331: negative regulation of hippo signaling;GO:0046621: negative regulation of organ growth;GO:0046621: negative regulation of organ growth	GO:0005737: cytoplasm;GO:0005829: cytosol	GO:0019900: kinase binding;GO:0019900: kinase binding;GO:0060090: molecular adaptor activity;GO:0060090: molecular adaptor activity
ENSG00000081853|PCDHGA2	79.1973	-2.23656	0.737935	-3.03084	0.00243875	0.0549988	GO:0007155: cell adhesion;GO:0007156: homophilic cell adhesion via plasma membrane adhesion molecules	GO:0005887: integral component of plasma membrane	GO:0005509: calcium ion binding
ENSG00000165091|TMC1	104.032	1.30706	0.431788	3.02709	0.00246918	0.055609	GO:0050910: detection of mechanical stimulus involved in sensory perception of sound;GO:0060005: vestibular reflex;GO:0060117: auditory receptor cell development;GO:0070588: calcium ion transmembrane transport;GO:1903169: regulation of calcium ion transmembrane transport	GO:0005887: integral component of plasma membrane;GO:0009897: external side of plasma membrane;GO:0032426: stereocilium tip	GO:0005245: voltage-gated calcium channel activity;GO:0008381: mechanosensitive ion channel activity
ENSG00000125354|SEPTIN6	46.3968	-1.83689	0.607048	-3.02594	0.00247862	0.0557453	GO:0000281: mitotic cytokinesis;GO:0007283: spermatogenesis;GO:0030154: cell differentiation;GO:0034613: cellular protein localization;GO:0060271: cilium assembly;GO:0061640: cytoskeleton-dependent cytokinesis	GO:0000776: kinetochore;GO:0005819: spindle;GO:0005940: septin ring;GO:0008021: synaptic vesicle;GO:0015630: microtubule cytoskeleton;GO:0030496: midbody;GO:0031105: septin complex;GO:0031105: septin complex;GO:0032153: cell division site;GO:0032154: cleavage furrow;GO:0032173: septin collar;GO:0043679: axon terminus;GO:0097227: sperm annulus	GO:0003924: GTPase activity;GO:0005515: protein binding;GO:0005525: GTP binding;GO:0060090: molecular adaptor activity
ENSG00000161835|TAMALIN	44.6042	2.07719	0.686616	3.02526	0.00248421	0.0557948	GO:0007165: signal transduction;GO:0008104: protein localization;GO:0099152: regulation of neurotransmitter receptor transport, endosome to postsynaptic membrane	GO:0005886: plasma membrane;GO:0014069: postsynaptic density;GO:0045211: postsynaptic membrane;GO:0048471: perinuclear region of cytoplasm;GO:0098685: Schaffer collateral - CA1 synapse;GO:0098978: glutamatergic synapse	GO:0030165: PDZ domain binding;GO:0031267: small GTPase binding;GO:0042802: identical protein binding
ENSG00000185950|IRS2	215.688	-1.1116	0.367709	-3.02303	0.00250258	0.0561308	GO:0002053: positive regulation of mesenchymal cell proliferation;GO:0002903: negative regulation of B cell apoptotic process;GO:0006006: glucose metabolic process;GO:0007165: signal transduction;GO:0007420: brain development;GO:0008284: positive regulation of cell population proliferation;GO:0008286: insulin receptor signaling pathway;GO:0008286: insulin receptor signaling pathway;GO:0009749: re…	GO:0005829: cytosol;GO:0005829: cytosol;GO:0005886: plasma membrane;GO:0005886: plasma membrane;GO:0032991: protein-containing complex	GO:0005158: insulin receptor binding;GO:0005515: protein binding;GO:0019901: protein kinase binding;GO:0019903: protein phosphatase binding;GO:0019904: protein domain specific binding;GO:0043548: phosphatidylinositol 3-kinase binding;GO:0071889: 14-3-3 protein binding
ENSG00000224596|ZMIZ1-AS1	2499.16	0.892211	0.295343	3.02094	0.00251994	0.0564433
[truncated: 17,896 more rows]
